# Supplementary material for: Highly enantioselective zinc/BINOL-catalyzed alkynylation of α-ketoimine ester: a new entry to optically active quaternary α-CF3 α-amino acids
Source: Royal Society of Chemistry journal article supplement (doi:10.1039/c1cc10403a), 2011-01-01
Supplement: c1cc10403a.pdf [file c1cc10403a.pdf]

*Supporting Information for*

# Highly Enantioselective Zn(BINOL)-Catalyzed Alkynylation of $\alpha$ -Ketoimine Ester: A New Entry to Optically Active Quaternary $\alpha$ -CF<sub>3</sub> $\alpha$ -Amino Acids

Gaochao Huang,<sup>a</sup> Jie Yang,<sup>b</sup> and Xingang Zhang\*,<sup>a</sup>

<sup>a</sup>*Key Laboratory of Organofluorine Chemistry, Shanghai Institute of Organic Chemistry, Chinese Academy of Sciences, 345 Lingling Road, Shanghai 200032, China, and* <sup>b</sup>*Graduate School of Southwest Petroleum University Southwest Petroleum University*  
8 Xindu Avenue, Chengdu 610065, China  
[xgzhang@mail.sioc.ac.cn](mailto:xgzhang@mail.sioc.ac.cn)

## List of Contents

|                                                                                                                                                           |     |
|-----------------------------------------------------------------------------------------------------------------------------------------------------------|-----|
| 1) Screens for addition of phenylacetylene <b>2a</b> to $\alpha$ -ketoimine ester <b>1a</b> with different transition metal catalysts ( <b>Table S1</b> ) | S04 |
| 2) General procedure for addition of phenylacetylene <b>2a</b> to $\alpha$ -ketoimine ester <b>1</b> with zinc/BINOL catalytic system ( <b>Table S2</b> ) | S04 |
| 3) SED Tests of <b>3a</b> and <b>3h</b> ( <b>Table S3 and S4</b> )                                                                                        | S06 |
| 4) Preparation of $\alpha$ -ketoimine ester <b>1</b>                                                                                                      | S07 |
| 5) General procedure for enantioselective addition of terminal alkynes to $\alpha$ -ketoimine ester <b>1</b>                                              | S08 |
| 6) Data for compounds <b>3</b>                                                                                                                            | S09 |
| 7) Gram-scale catalytic asymmetric synthesis of <b>3a</b> and <b>3m</b>                                                                                   | S17 |
| 8) Preparation of compound <b>6</b>                                                                                                                       | S18 |
| 9) Preparation of compound <b>7</b>                                                                                                                       | S20 |
| 10) Copies of $^1\text{H}$ NMR, $^{19}\text{F}$ NMR and $^{13}\text{C}$ NMR spectra of <b>1</b>                                                           | S22 |
| 11) Copies of $^1\text{H}$ NMR, $^{19}\text{F}$ NMR, $^{13}\text{C}$ NMR, and HPLC analysis spectra of <b>3</b>                                           | S24 |
| 12) Copies of $^1\text{H}$ NMR, $^{19}\text{F}$ NMR, $^{13}\text{C}$ NMR, and HPLC analysis spectra of <b>5</b> and <b>6</b>                              | S68 |
| 13) Copies of $^1\text{H}$ NMR, $^{19}\text{F}$ NMR, $^{13}\text{C}$ NMR, and HPLC analysis spectra of <b>7</b>                                           | S71 |

**General information:**  $^1\text{H}$  NMR and  $^{13}\text{C}$  NMR spectra were recorded on a Bruker AM300 and AM400 spectrometer.  $^{19}\text{F}$  NMR was recorded on a Bruker AM300 spectrometer ( $\text{CFCl}_3$  as outside standard and low field is positive). Chemical shifts ( $\delta$ ) are reported in ppm, and coupling constants ( $J$ ) are in Hertz (Hz). The following abbreviations were used to explain the multiplicities: s = singlet, d = doublet, t = triplet, q = quartet, m = multiplet, br = broad. NMR yield was determined by  $^{19}\text{F}$  NMR using trifluorobenzene as an internal standard before working up the reaction.

**Materials:**  $\text{Me}_2\text{Zn}$  (1.2 M in toluene) was purchased from Acros, all alkynes were from Aldrich, and methyl trifluoropyruvate was from Intechem, China. All reagents were weighed and handled in air, and refilled with an inert atmosphere of  $\text{N}_2$  at room temperature. Toluene and hexane were distilled from sodium and benzophenone immediately before use.  $\text{CH}_2\text{Cl}_2$  and  $\text{CHCl}_3$  were distilled from  $\text{CaH}_2$ . The BINOL type ligands **4a**,<sup>1</sup> **4c-g**,<sup>1</sup> **4h-j**<sup>2</sup> were prepared according to literatures.

**Table S1.** Screens for Addition of Phenylacetylene **2a** to  $\alpha$ -Ketoimine Ester **1** with Different Transition Metal Catalysts.<sup>a</sup>

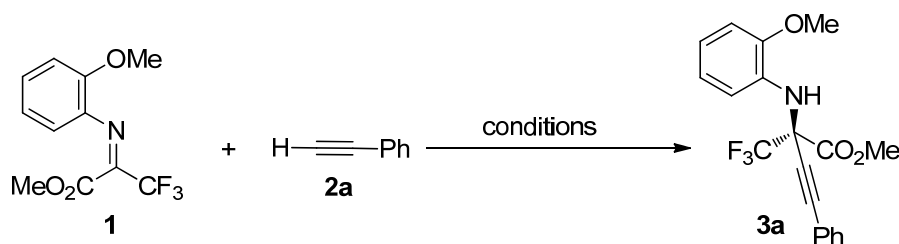

| Entry | Catalyst                               | Ligand    | Yield <sup>b</sup> |
|-------|----------------------------------------|-----------|--------------------|
| 1     | CuPF <sub>6</sub> .CH <sub>3</sub> CN  | <b>L1</b> | 0                  |
| 2     | CuPF <sub>6</sub> .CH <sub>3</sub> CN  | <b>L2</b> | 0                  |
| 3     | CuOTf.0.5C <sub>6</sub> H <sub>6</sub> | <b>L1</b> | 0                  |
| 4     | CuOTf.0.5C <sub>6</sub> H <sub>6</sub> | <b>L2</b> | 0                  |
| 5     | Sc(OTf) <sub>3</sub>                   | <b>L2</b> | 0                  |
| 6     | Zn(OTf) <sub>2</sub>                   | ----      | 0                  |

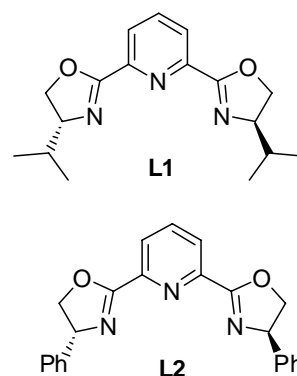

<sup>a</sup>Reaction conditions: **1** (0.3 mmol), **2a** (0.6 mmol), catalyst (10 mol%), **L** (10 mol%) PMP-NH<sub>2</sub> (0.1 equiv) in CH<sub>2</sub>Cl<sub>2</sub> at room temperature. <sup>b</sup>Part of **1** was decomposed and some uncertain products were observed. N.R., no reaction.

**General Procedure for Addition of Phenylacetylene **2a** to  $\alpha$ -Ketoimine Ester **1** with Zinc/BINOL Catalytic System (Table S2).** To a solution of Phenylacetylene **2a** (1.7-3.3 equiv) in anhydrous solvent (1.2 mL) was added Me<sub>2</sub>Zn (1.2-1.5 equiv, 1.2 M in toluene) under Ar at room temperature. After stirring for 1h, BINOL type ligand **4** (5-10 mol%) was added as a solid in one portion. The reaction mixture was stirred for 2.5 h at room temperature.  $\alpha$ -CF<sub>3</sub> ketoimine ester **1** (0.3 mmol) was then added as an oil by a microliter syringe. The reaction mixture was stirred at the same temperature until the starting material was totally consumed, as confirmed by means of TLC. The reaction mixture was quenched with saturated NH<sub>4</sub>Cl, and diluted with EtOAc. The aqueous layer was extracted with EtOAc. The combined organic extract was dried over anhydrous sodium sulfate, filtered, and concentrated. The residue was purified using chromatography on silica gel (Petroleum ether /Ethyl acetate = 100:1) to give product **3a**.

**Table S2.** Addition of Phenylacetylene **2a** to  $\alpha$ -Ketoimine Ester **1** with Zn/BINOL Catalytic System<sup>a</sup>

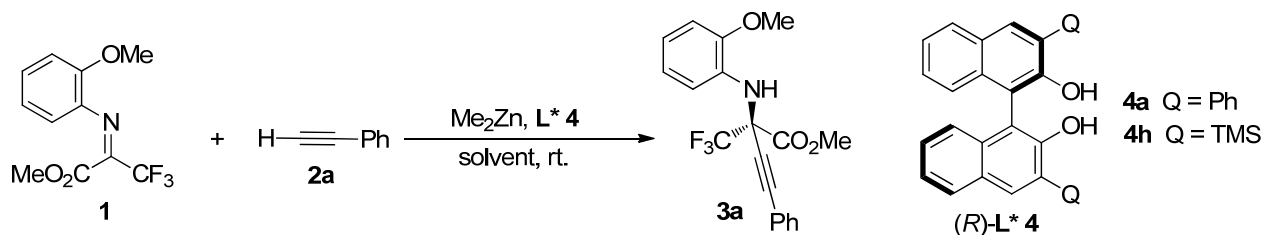

| Entry     | $\text{Me}_2\text{Zn}$ (equiv) | <b>2a</b> (equiv) | <b>L* 4</b> (x mol%) | Solvent                  | Time (h)  | Yield (%) <sup>b</sup> | ee (%) <sup>c</sup> |
|-----------|--------------------------------|-------------------|----------------------|--------------------------|-----------|------------------------|---------------------|
| 1         | 1.5                            | 2.4               | <b>4a</b> , 10       | toluene                  | 8         | 78                     | 87                  |
| 2         | 1.5                            | 2.7               | <b>4a</b> , 10       | toluene                  | 8         | 80                     | 88                  |
| 3         | 1.5                            | 3.3               | <b>4a</b> , 10       | toluene                  | 8         | 77                     | 87                  |
| 4         | 1.3                            | 2.1               | <b>4a</b> , 10       | toluene                  | 8         | 89                     | 88                  |
| 5         | 1.2                            | 2.0               | <b>4a</b> , 10       | toluene                  | 8         | 90                     | 85                  |
| 6         | 1.2                            | 2.0               | <b>4a</b> , 10       | $\text{CH}_2\text{Cl}_2$ | 8         | 76                     | 87                  |
| 7         | 1.2                            | 2.0               | <b>4a</b> , 10       | $\text{CHCl}_3$          | 12        | 84                     | 62                  |
| 8         | 1.2                            | 2.0               | <b>4a</b> , 10       | Hexane                   | 8         | 76                     | 82                  |
| 9         | 1.2                            | 2.0               | <b>4h</b> , 10       | toluene                  | 8         | 91                     | 97                  |
| <b>10</b> | <b>1.2</b>                     | <b>1.7</b>        | <b>4h</b> , <b>5</b> | <b>toluene</b>           | <b>24</b> | <b>90</b>              | <b>97.3</b>         |

<sup>a</sup>Reaction conditions: **1** (0.3 mmol) in solvent (1.2 mL); <sup>b</sup>Isolated yield; <sup>c</sup> Determined by chiral HPLC analysis.

**General Procedure for Self-Disproportionation of Enantiomers (SDE) Test of Compounds 3a and 3h.** After the enantioselective addition of alkyne **2a** or **2h** to  $\alpha$ -Ketoimine ester **1**, the reaction mixture was worked up as mentioned in general procedure. The crude product **3a** or **3h** was run on silica gel chromatography to give 7 fractions that include all of the product. The 7 fractions were subsequently determined ee values by chiral HPLC analysis separately as shown in Table S3 and S4.

The SDE tests of **3a** and **3h** showed that **3a** has slight SDE effect, but no such effect for **3h**. However, the ee values obtained before and after column chromatography are similar, suggesting that the ee values obtained after purification are not influenced by the SDE effect of **3**.

**Table S3.** Self-disproportionation of enantiomers (SDE) test of compound **3a**.<sup>a</sup>

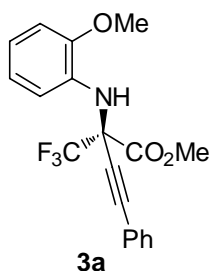

| Fraction    | Mass / mg | Mass% | % ee <sup>b</sup> |
|-------------|-----------|-------|-------------------|
| A1          | 12.8      | 8.8   | 99.8              |
| B2          | 18.9      | 13.1  | 97.2              |
| C3          | 21.0      | 14.5  | 97.6              |
| D4          | 23.7      | 16.4  | 97.7              |
| E5          | 20.4      | 14.1  | 97.7              |
| F6          | 15.0      | 10.4  | 97.9              |
| G7          | 32.9      | 22.7  | 97.9              |
| SUM (A1-G7) | 144.7     | 100   | 97.9 <sup>c</sup> |

<sup>a</sup>Silica gel chromatography eluent: petroleum ether/ethyl acetate = 100/1. <sup>b</sup>Determined by chiral HPLC analysis after column chromatography (AD-H, flow 0.7mL/min, Hexane/i-PrOH = 98:2, 214 nm,  $t_R$  = 7.783 min (major) and  $t_R$  = 10.077 min (minor)). 98.3% ee was obtained before column chromatography for compound **3a**. <sup>c</sup> average ee value based on calculation.

**Table S4.** Self-disproportionation of enantiomers (SDE) test of compound **3h**.<sup>a</sup>

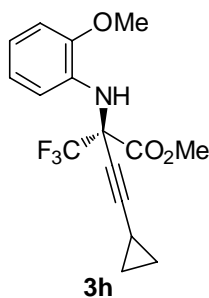

| Fraction    | Mass / mg | Mass% | % ee <sup>b</sup> |
|-------------|-----------|-------|-------------------|
| A1          | 2.0       | 2.2   | 98.71             |
| B2          | 6.7       | 7.2   | 98.29             |
| C3          | 7.7       | 8.3   | 98.09             |
| D4          | 17.1      | 18.4  | 98.04             |
| E5          | 25.1      | 27.1  | 98.40             |
| F6          | 16.8      | 18.1  | 98.98             |
| G7          | 17.3      | 18.7  | 98.42             |
| SUM (A1-G7) | 92.7      | 100   | 98.4 <sup>c</sup> |

<sup>a</sup>Silica gel chromatography eluent: petroleum ether/ethyl acetate = 200/1. <sup>b</sup>Determined by chiral HPLC analysis after column chromatography (PC-1, flow 0.7mL/min, Hexane/i-PrOH = 98:2, 214 nm,  $t_R$  = 7.485 min (major) and  $t_R$  = 8.052 min (minor)). 98.5% ee was obtained before column chromatography for compound **3h**. <sup>c</sup>Average ee value based on calculation.

### Preparation of $\alpha$ -Ketoimine Ester **1**.

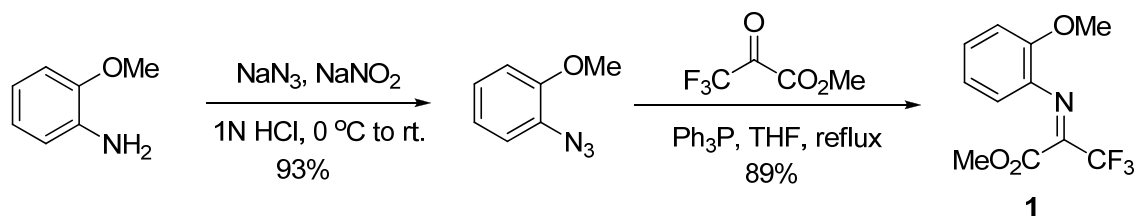

**Methyl 3,3,3-trifluoro-2-(2-methoxyphenylimino)propanoate (1).**<sup>3, 4</sup> To a solution of 2-methoxyaniline (3.3 mL, 30 mmol) in 1N HCl (30 mL) was added NaNO<sub>2</sub> (2.08 g, 30 mmol) at 0 °C. After stirring for 2 h at same temperature, the reaction mixture was warmed to room temperature. NaN<sub>3</sub> (2.34 g, 36 mmol) was added. The reaction mixture stirred until the starting

material was consumed. The reaction mixture was diluted with ethyl acetate, washed with brine. The organic layer was dried over Na<sub>2</sub>SO<sub>4</sub>, filtered, and concentrated to give 1-azido-2-methoxybenzene 4.185 g (93% yield) as a brown oil, which was used for next step. To a solution of 1-azido-2-methoxybenzene (4.18 g, 28 mmol) in THF was added dropwise of a solution of Ph<sub>3</sub>P (7.31 g, 28 mmol) in THF (100 mL) at room temperature. The resulting mixture was then heated to reflux and stirred for 2 h. The reaction mixture was cooled to room temperature. Methyl trifluoropyruvate (1.87 mL, 16.7 mmol) was added. The reaction mixture was then heated to reflux and stirred until the starting material was consumed. The reaction was then cooled to room temperature and concentrated. The residue was extracted with petroleum ether several times. The combined organic layers were concentrated. The residue was purified with silica gel by flash chromatography (Petroleum ether /Ethyl Acetate = 80:1) to give **1** (3.90 g, 89% yield) as a brown oil. <sup>1</sup>H NMR (300 MHz, CDCl<sub>3</sub>) δ 7.17 (td, *J* = 8.7, 2.4, 1H), 6.99-6.94 (m, 2H), 6.92-6.87 (m, 2H), 3.71 (s, 3H), 3.67 (s, 3H); <sup>19</sup>F NMR (282 MHz, CDCl<sub>3</sub>) δ -69.6 (s, 3F). IR (thin film): ν<sub>max</sub> 2858, 1747, 1593 cm<sup>-1</sup>. MS (EI): *m/z* (%) 261 (M<sup>+</sup>), 202 (100), 133, 77. HRMS: Calculated for C<sub>11</sub>H<sub>10</sub>NO<sub>3</sub>F<sub>3</sub> (M<sup>+</sup>): 261.0613; Found: 261.0612.

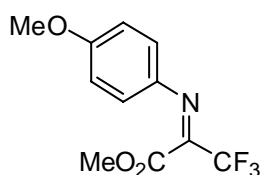

**Methyl 3,3,3-trifluoro-2-(4-methoxyphenylimino)propanoate (1').**<sup>5</sup> The preparation of **1'** is same with **1**. <sup>1</sup>H NMR (300 MHz, CDCl<sub>3</sub>) δ 7.01 (d, *J* = 6.9, 2H), 6.90 (d, *J* = 6.9, 2H), 3.82 (s, 3H), 3.78 (s, 3H); <sup>19</sup>F NMR (282 MHz, CDCl<sub>3</sub>) δ -69.5 (s, 3F).

### General Procedure for Enantioselective Addition of Terminal Alkynes to α-Ketoimine Esters **1**.

To a solution of terminal alkyne **2** (1.7 equiv) in anhydrous toluene (1.2 mL) was added Me<sub>2</sub>Zn (300 μL, 1.2 M in toluene) under Ar at room temperature. After stirring for 1h, BINOL type ligand **4h** (6.5 mg, 5 mol%) was added as a solid in one portion. The reaction mixture was stirred for 2.5 h at room temperature. α-Fluoroalkyl ketoimine ester **1** (0.3 mmol) was then added as an oil with a microliter syringe. The reaction mixture was stirred at the same temperature until the starting material was totally consumed, as confirmed by means of TLC. The reaction mixture was quenched with saturated NH<sub>4</sub>Cl, and diluted with EtOAc. The aqueous layer was extracted with EtOAc. The combined organic extract was dried over anhydrous sodium sulfate, and the solvent was removed in



vacuo. The residue was purified using chromatography on silica gel to give product **3**.

**Note:** For  $\alpha$ -CF<sub>3</sub>  $\alpha$ -amino acids **3**, two ee values were provided for each compound, which were determined before and after silica gel column chromatography.

### General Procedure for Synthesis of Racemic **3**.

To a solution of terminal alkyne **2** (1.7 equiv) in anhydrous toluene (1.2 mL) was added Me<sub>2</sub>Zn (300  $\mu$ L, 1.2 M in toluene) under Ar at room temperature. After stirring for 1h, racemic BINOL **4h** (6.5 mg, 5 mol%) was added as a solid in one portion. The reaction mixture was stirred for 2.5 h at room temperature.  $\alpha$ -CF<sub>3</sub> ketoimine ester **1** (0.3 mmol) was then added as an oil by a microliter syringe. The reaction mixture was stirred at the same temperature until the starting material was totally consumed, as confirmed by means of TLC. The reaction mixture was quenched with saturated NH<sub>4</sub>Cl, and diluted with EtOAc. The aqueous layer was extracted with EtOAc. The combined organic extract was dried over anhydrous sodium sulfate, and the solvent was removed in vacuo. The residue was purified using chromatography on silica gel to give products **3**.

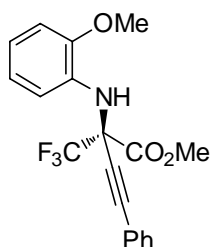

**(R)-Methyl 2-(2-methoxyphenylamino)-4-phenyl-2-(trifluoromethyl)but**

**-3-ynoate (3a).** The product (98 mg, 90% yield) as a colorless oil was purified

with silica gel chromatography (Petroleum ether/Ethyl acetate = 100:1). <sup>1</sup>H NMR (300 MHz, CDCl<sub>3</sub>)  $\delta$  7.41-7.32 (m, 5 H), 7.20 (m, 1H), 6.86 (m, 3H), 3.96 (s, 3H), 3.89 (s, 3H); <sup>13</sup>C NMR (100 MHz, CDCl<sub>3</sub>)  $\delta$  165.9, 148.6, 132.7, 131.9 (2), 129.3,

128.3 (2), 123.0 (q,  $J$  = 288.1), 121.0, 120.3, 120.2, 116.0 (q,  $J$  = 2.2), 109.8, 89.6, 78.6, 63.4 (q,  $J$  = 32.1), 55.6, 54.7; <sup>19</sup>F NMR (282 MHz, CDCl<sub>3</sub>)  $\delta$  -74.8 (s, 3F). IR (thin film):  $\nu_{\text{max}}$  3373, 2238, 1758, 1602 cm<sup>-1</sup>. LRMS (EI):  $m/z$  (%) 363 (M<sup>+</sup>), 304 (100), 77. HRMS (EI) Calcd for C<sub>19</sub>H<sub>16</sub>F<sub>3</sub>NO<sub>3</sub>: 363.1082. Found: 363.1083.  $[\alpha]_D^{25}$  = -7.8 ( $c$  3.2, CHCl<sub>3</sub>) for a 97.3% ee sample Enantiomeric purity was determined by chiral HPLC analysis (AD-H, flow 0.7mL/min, Hexane/i-PrOH = 98:2, 214 nm,  $t_R$  = 7.727 min (major) and  $t_R$  = 9.977 min (minor)): 98.3% ee (before silica gel column chromatography), 97.3% ee (after silica gel column chromatography).

**(R)-Methyl 2-(4-methoxyphenylamino)-4-phenyl-2-(trifluoromethyl)but-3-ynoate (3a').** 2.0

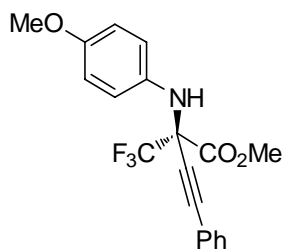

equiv of phenylacetylene was used. The product (98 mg, 90% yield) as a colorless oil was purified with silica gel chromatography (Petroleum ether/Ethyl acetate = 100:1). <sup>1</sup>H NMR (300 MHz, CDCl<sub>3</sub>) δ 7.39 – 7.23 (m, 5H), 7.06 (d, *J* = 9.0, 2H), 6.80 (d, *J* = 9.0, 2H), 3.94 (s, 3H), 3.77 (s, 3H).

<sup>13</sup>C NMR (75.4 MHz, CDCl<sub>3</sub>) δ = 166.4, 155.5, 136.1, 131.9(2), 129.3,

128.3(2), 122.9(2), 122.8 (q, *J* = 287.1), 121.0, 113.9(2), 90.3, 78.6, 65.3 (q, *J* = 30.9), 55.4, 54.7.

<sup>19</sup>F NMR (282 MHz, CDCl<sub>3</sub>) δ -75.3 (s, 3F). IR (thin film): ν<sub>max</sub> 3354, 2241, 1755, 1574 cm<sup>-1</sup>.

LRMS (EI): *m/z* (%) 363 (M<sup>+</sup>), 304 (100), 234, 122. HRMS (EI) Calcd for C<sub>19</sub>H<sub>16</sub>F<sub>3</sub>NO<sub>3</sub>: 363.1082.

Found: 363.1081. [α]<sub>D</sub><sup>27</sup> = -21 (*c* 0.55, CHCl<sub>3</sub>) for a 95.7% ee sample. Enantiomeric purity was determined by chiral HPLC analysis (AD-H, flow 0.7mL/min, Hexane:i-PrOH=95:5, 214nm, t<sub>R</sub> = 11.627 min (major) and t<sub>R</sub> = 11.727 min (minor)): 96.1% ee (before silica gel column chromatography), 95.7% ee (after silica gel column chromatography).

**(R)-Methyl 2-(2-methoxyphenylamino)-4-(4-propylphenyl)-2-(trifluoromethyl)but-3-ynoate (3b).**

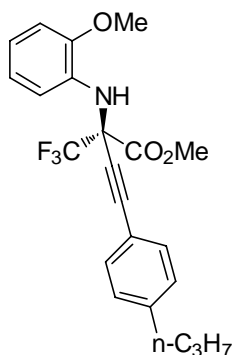

The product (112 mg, 92% yield) as a colorless oil was purified with silica gel chromatography (Petroleum ether/Ethyl acetate = 100:1). <sup>1</sup>H NMR (300

MHz, CDCl<sub>3</sub>) δ 7.31 (d, *J* = 8.2, 2H), 7.20 (t, *J* = 3.8, 1H), 7.11 (d, *J* = 8.2, 2H), 6.83 – 6.87 (m, 3H), 3.95 (s, 3H), 3.89 (s, 3H), 2.56 (t, *J* = 7.2, 2H), 1.61 (m, 2H), 0.91 (t, *J* = 7.3, 3H); <sup>13</sup>C NMR (75.4 MHz, CDCl<sub>3</sub>) δ 166.0, 148.4, 144.4,

132.7, 131.8(2), 128.4(2), 123.0 (q, *J* = 288.2), 120.3, 120.0, 118.1, 115.9 (q, *J*

= 2.0), 109.7, 89.9, 77.9, 63.3 (q, *J* = 32.2), 55.6, 54.7, 37.9, 24.3, 13.6; <sup>19</sup>F NMR (282 MHz, CDCl<sub>3</sub>)

δ -74.9 (s, 3F). IR (thin film): ν<sub>max</sub> 3372, 2237, 1759, 1603 cm<sup>-1</sup>. LRMS (EI): *m/z* (%) 405 (M<sup>+</sup>), 346

(100), 336. HRMS (EI) Calcd for C<sub>22</sub>H<sub>22</sub>F<sub>3</sub>NO<sub>3</sub>: 405.1552. Found: 405.1549. [α]<sub>D</sub><sup>24</sup> = -1.8 (*c* 1.5,

CHCl<sub>3</sub>) for a 97.5% ee sample. Enantiomeric purity was determined by chiral HPLC analysis

(AD-H, flow 0.7mL/min, Hexane/i-PrOH = 95:5, 214 nm, t<sub>R</sub> = 6.73 min (major) and t<sub>R</sub> = 9.23

min(minor)).

**(R)-Methyl 4-(4-methoxyphenyl)-2-(2-methoxyphenylamino)-2-(trifluoromethyl)but-3-ynoate (3c).**

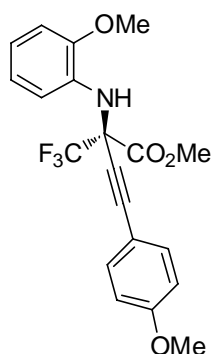

(**3c**). The product (102 mg, 87% yield) as a white solid was purified with silica gel chromatography (Petroleum ether/Ethyl acetate = 100:1). M.P. 68-71 °C; <sup>1</sup>H NMR (300 MHz, CDCl<sub>3</sub>) δ 7.33 (d, *J* = 8.9, 2H), 7.20 (m, 1H), 6.80 – 6.87 (m, 5H), 3.95 (s, 3H), 3.89 (s, 3H), 3.80 (s, 3H). <sup>13</sup>C NMR (75.4 MHz, CDCl<sub>3</sub>) δ 166.1, 160.3, 148.5, 133.5(2), 132.8, 123.1 (q, *J* = 288.1), 120.2, 120.0, 116.0 (q, *J* = 2.2), 113.9(2), 113.0, 109.8, 89.7, 77.3, 63.4 (q, *J* = 32.3), 55.6, 55.3, 54.7.

<sup>19</sup>F NMR (282 MHz, CDCl<sub>3</sub>) δ -74.9 (s, 3F). IR (thin film): ν<sub>max</sub> 3369, 2235, 1758, 1605, 1511 cm<sup>-1</sup>. LRMS (EI): *m/z* (%) 393 (M<sup>+</sup>), 334 (100), 324. HRMS (EI) Calcd for C<sub>20</sub>H<sub>18</sub>F<sub>3</sub>NO<sub>4</sub>: 393.1188. Found: 393.1190. [α]<sub>D</sub><sup>20</sup> = 0.6 (*c* 1.5, CHCl<sub>3</sub>) for a 95.9% ee sample. Enantiomeric purity was determined by chiral HPLC analysis (AD-H, flow 0.7 mL/min, Hexane/i-PrOH = 98:2, 214 nm, t<sub>R</sub> = 11.477 min (major) and t<sub>R</sub> = 18.827 min (minor)): 98.5% ee (before silica gel column chromatography), 95.9% ee (after silica gel column chromatography).

**(R)-Methyl 4-(6-methoxynaphthalen-2-yl)-2-(2-methoxyphenylamino)-2-(trifluoromethyl)but-3-ynoate (3d).**

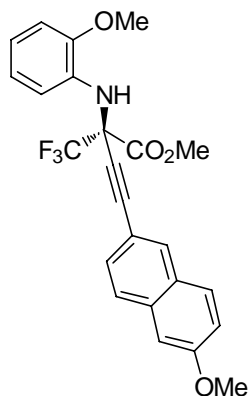

The product (120 mg, 91% yield) as a white solid was purified with silica gel chromatography (Petroleum ether/Ethyl acetate = 50:1). M.P. 83-86 °C; <sup>1</sup>H NMR (300 MHz, CDCl<sub>3</sub>) δ 7.85 (s, 1H), 7.65 (t, *J* = 8.3, 2H), 7.37 (dd, *J* = 8.5, 1.3, 1H), 7.25 (m, 1H), 7.15 (dd, *J* = 9.0, 2.4, 1H), 7.08 (d, *J* = 1.9, 1H), 6.88 (m, 3H), 5.78 (br, 1H), 3.97 (s, 3H), 3.91 (s, 3H), 3.90 (s, 3H). <sup>13</sup>C NMR (75.4 MHz, CDCl<sub>3</sub>) δ 166.0, 158.6, 148.5, 134.6, 132.7, 132.2, 129.4, 128.6, 128.0, 126.8, 123.1 (q, *J* = 288.4), 120.3, 120.1, 119.6, 116.0, 115.7,

110.0, 105.6, 90.2, 78.1, 63.4 (q, *J* = 32.0), 55.6, 55.3, 54.8. <sup>19</sup>F NMR (282 MHz, CDCl<sub>3</sub>) δ -74.8 (s, 3F). IR (thin film): ν<sub>max</sub> 3387, 2231, 1763, 1627, 1603 cm<sup>-1</sup>. LRMS (EI): *m/z* (%) 443 (M<sup>+</sup>), 384 (100), 338. HRMS (EI) Calcd for C<sub>24</sub>H<sub>20</sub>F<sub>3</sub>NO<sub>4</sub>: 443.1344. Found: 443.1347. [α]<sub>D</sub><sup>24</sup> = 13.2 (*c* 2.20, CHCl<sub>3</sub>) for a 95.8% ee sample. Enantiomeric purity was determined by chiral HPLC analysis (AD-H, flow 0.7 mL/min, Hexane/i-PrOH = 98:2, 214 nm, t<sub>R</sub> = 15.177 min (major) and t<sub>R</sub> = 22.727 min (minor)): 96.0% ee (before silica gel chromatography), 95.8% ee (after silica gel column chromatography).

**(R)-Methyl 4-(3-chlorophenyl)-2-(2-methoxyphenylamino)-2-(trifluoromethyl)but-3-ynoate (3e).**

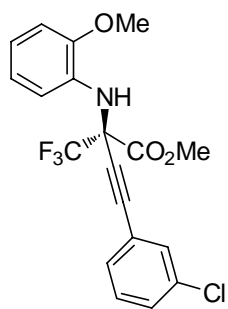

(**3e**). The product (108 mg, 90% yield) as a white solid was purified with silica gel chromatography (Petroleum ether/Ethyl acetate = 100:1). M.P. 27-29 °C; <sup>1</sup>H NMR (300 MHz, CDCl<sub>3</sub>) δ 7.37-7.32 (m, 2H), 7.28-7.22 (m, 2H), 7.14 (m, 1H), 6.89 – 6.84 (m, 3H), 3.96 (s, 3H), 3.89 (s, 3H). <sup>13</sup>C NMR (75.4 MHz, CDCl<sub>3</sub>) δ 165.6, 148.5, 134.1, 132.5, 131.7, 130.1, 129.7, 129.6, 122.9 (q, *J* = 288.1), 122.6, 120.4, 120.2, 115.9 (q, *J* = 1.9), 109.8, 88.1, 79.8, 63.4 (q, *J* =

31.7), 55.6, 54.8; <sup>19</sup>F NMR (282 MHz, CDCl<sub>3</sub>) δ -74.8 (s, 3F). IR (thin film): ν<sub>max</sub> 3360, 2240, 1759, 1602 cm<sup>-1</sup>. LRMS (EI): *m/z* (%) 399 (M<sup>+</sup>), 397 (M<sup>+</sup>), 338 (100), 202. HRMS (EI) Calcd for C<sub>19</sub>H<sub>15</sub>ClF<sub>3</sub>NO<sub>3</sub>: 397.0693. Found: 397.0696. [α]<sub>D</sub><sup>24</sup> = -3.3 (*c* 3.0, CHCl<sub>3</sub>) for a 93.9% ee sample. Enantiomeric purity was determined by chiral HPLC analysis (AD-H, flow 0.7mL/min, Hexane/i-PrOH = 98:2, 214 nm, t<sub>R</sub> = 7.127 min (major) and t<sub>R</sub> = 7.877 min (minor)): 94.6% ee (before silica gel column chromatography), 93.9% ee (after silica gel column chromatography).

**(R)-Ethyl 4-(4,4,4-trifluoro-3-(methoxycarbonyl)-3-(2-methoxyphenylamino)but-1-ynyl)benzoate (3f).**

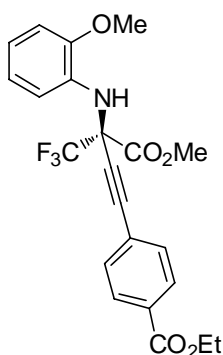

product (121 mg, 93% yield) as a colorless oil was purified with silica gel chromatography (Petroleum ether/Ethyl acetate = 100:1). <sup>1</sup>H NMR (300 MHz, CDCl<sub>3</sub>) δ 7.98 (d, *J* = 8.3, 2H), 7.44 (d, *J* = 8.3, 2H), 7.15 (m, 1H), 6.89 – 6.84 (m, 3H), 5.76 (br, 1H), 4.37 (q, *J* = 7.1, 2H), 3.97 (s, 3H), 3.89 (s, 3H), 1.39 (t, *J* = 7.1, 3H). <sup>13</sup>C NMR (100 MHz, CDCl<sub>3</sub>) δ 165.7, 165.6, 148.6, 132.5, 131.8, 130.9, 129.3, 125.4, 122.9 (q, *J* = 288.0), 120.4, 120.2, 116.0 (q, *J* = 2.0), 109.9, 88.7, 81.3, 63.5 (q, *J* = 32.2), 61.2, 55.6, 54.8, 14.2. <sup>19</sup>F NMR (282 MHz, CDCl<sub>3</sub>)

δ -74.7 (s, 3F). IR (thin film): ν<sub>max</sub> 3370, 2240, 1759, 1721, 1604 cm<sup>-1</sup>. LRMS (EI): *m/z* (%) 435 (M<sup>+</sup>), 376 (100), 202. HRMS(EI) Calcd for C<sub>20</sub>H<sub>20</sub>F<sub>3</sub>NO<sub>5</sub>: 435.1294. Found: 435.1296. [α]<sub>D</sub><sup>25</sup> = 7.1 (*c* 2.9, CHCl<sub>3</sub>) for a 91.9% ee sample. Enantiomeric purity was determined by chiral HPLC analysis (AD-H, flow 0.7mL/min, Hexane/i-PrOH = 98:2, 214 nm, t<sub>R</sub> = 13.627 min (major) and t<sub>R</sub> = 20.617 min (minor)): 91.9% ee (before silica gel column chromatography), 91.9% ee (after silica gel column chromatography).

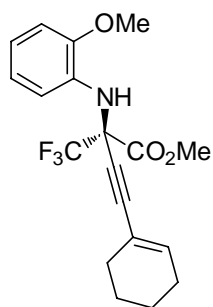

**(R)-Methyl 4-cyclohexenyl-2-(2-methoxyphenylamino)-2-(trifluoromethyl)but**

**-3-ynoate (3g).** 2.5 equiv of 1-ethynylcyclohex-1-ene and 1.2 equiv of  $\text{Me}_2\text{Zn}$

were used. The product (101 mg, 91% yield) as a colorless oil was purified

with silica gel chromatography (Petroleum ether/Ethyl acetate = 200:1).  $^1\text{H}$

NMR (300 MHz,  $\text{CDCl}_3$ )  $\delta$  7.12 (m, 1H), 6.86 – 6.83 (m, 3H), 6.16 (m, 1H),

5.70 (br, 1H), 3.92 (s, 3H), 3.87 (s, 3H), 2.06 (m, 4H), 1.58 (m, 4H).  $^{13}\text{C}$  NMR

(75.4 MHz,  $\text{CDCl}_3$ )  $\delta$  166.1, 148.3, 137.8, 132.7, 123.0 (q,  $J = 288.2$ ), 120.2, 119.8, 119.1, 115.9,

110.0, 91.4, 75.8, 63.2 (q,  $J = 32.0$ ), 55.6, 54.6, 28.2, 25.6, 21.9, 21.2.  $^{19}\text{F}$  NMR (282 MHz,  $\text{CDCl}_3$ )

$\delta$  -75.0 (s, 3F). IR (thin film):  $\nu_{\text{max}}$  3373, 2226, 1757, 1603  $\text{cm}^{-1}$ . LRMS (EI):  $m/z$  (%) 367 ( $\text{M}^+$ ), 308

(100), 298. HRMS (EI) Calcd for  $\text{C}_{19}\text{H}_{20}\text{F}_3\text{NO}_3$ : 367.1395. Found: 367.1390.  $[\alpha]_{\text{D}}^{24} = -12.4$  (c 1.10,

$\text{CHCl}_3$ ) for a 99.6% ee sample. Enantiomeric purity was determined by chiral HPLC analysis

(OD-H, flow 0.4mL/min, Hexane/i-PrOH = 100:1, 254 nm,  $t_{\text{R}} = 13.113$  min (major) and  $t_{\text{R}} = 14.627$

min (minor)): 99.5% ee (before silica gel column chromatography), 99.6% ee (after silica gel

column chromatography).

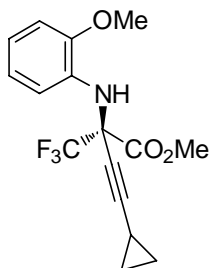

**(R)-Methyl 4-cyclopropyl-2-(2-methoxyphenylamino)-2-(trifluoromethyl)but-3-ynoate**

**(3h).** The product (89 mg, 91% yield) as a white solid was purified with silica gel

chromatography (Petroleum ether/Ethyl acetate = 200:1). M.P. 55-57  $^{\circ}\text{C}$ ;  $^1\text{H}$

NMR (300 MHz,  $\text{CDCl}_3$ )  $\delta$  7.06 (t,  $J = 3.6$  Hz, 1H), 6.85 – 6.81 (m, 3H), 5.61 (s,

1H), 3.90 (s, 3H), 3.86 (s, 3H), 1.26 (m, 1H), 0.83 – 0.73 (m, 2H), 0.72 – 0.58 (m,

2H).  $^{13}\text{C}$  NMR (75 MHz,  $\text{CDCl}_3$ )  $\delta$  166.2, 148.4, 132.8, 123.0 (q,  $J = 288.0$ ), 120.1, 119.9, 116.0 (q,

$J = 1.9$ ), 109.7, 94.1, 64.7, 62.8 (q,  $J = 32.2$ ), 55.6, 54.6, 8.2(2), -0.6.  $^{19}\text{F}$  NMR (282 MHz,  $\text{CDCl}_3$ )  $\delta$

-75.2 (s, 3F). IR (thin film):  $\nu_{\text{max}}$  3367, 2247, 1756, 1603  $\text{cm}^{-1}$ . LRMS (EI):  $m/z$  (%) 327 ( $\text{M}^+$ ), 268

(100), 258. HRMS (EI) Calcd for  $\text{C}_{16}\text{H}_{16}\text{F}_3\text{NO}_3$ : 327.1082. Found: 327.1087.  $[\alpha]_{\text{D}}^{24} = -7.4$  (c 1.3,

$\text{CHCl}_3$ ) for a 98.2% ee sample. Enantiomeric purity was determined by chiral HPLC analysis (PC-1,

flow 0.7mL/min, Hexane/i-PrOH = 98:2, 214 nm,  $t_{\text{R}} = 7.727$  min (major) and  $t_{\text{R}} = 8.477$  min

(minor)): 98.5% ee (before silica gel column chromatography), 98.2% ee (after silica gel column

chromatography).

**(R)-Methyl 2-(2-methoxyphenylamino)-5,5-dimethyl-2-(trifluoromethyl)hex-3-ynoate (3i).** To a

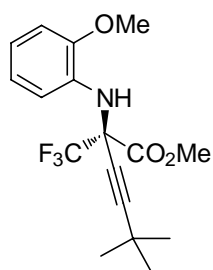

solution of 3,3-dimethylbut-1-yne (5.0 equiv) in anhydrous toluene (1.2 mL) in a sealed tube was added  $\text{Me}_2\text{Zn}$  (300  $\mu\text{L}$ , 1.2 M in toluene) under Ar at room temperature. After stirring for 12h, BINOL type ligand **4h** (6.5 mg, 5 mol%) was added as a solid in one portion. The reaction mixture was stirred for 2.5 h at room temperature.  $\alpha$ -Trifluoromethyl ketoimine ester **1a** (0.3 mmol) was

then added as an oil with a microliter syringe. The reaction mixture was stirred at the same temperature for 70h. The reaction mixture was quenched with saturated  $\text{NH}_4\text{Cl}$ , and diluted with EtOAc. The aqueous layer was extracted with EtOAc. The combined organic extracts were dried over anhydrous sodium sulfate, and the solvent was removed in vacuo. The residue was purified using chromatography (Petroleum ether/Ethyl acetate = 200:1) on silica gel to give product **3i** 94 mg (91% yield) as a white solid. M.P. 51-52  $^\circ\text{C}$ ;  $^1\text{H}$  NMR (300 MHz,  $\text{CDCl}_3$ )  $\delta$  7.14 (m, 1H), 6.87 – 6.76 (m, 3H), 3.91 (s, 3H), 3.87 (s, 3H), 1.17 (s, 9H).  $^{13}\text{C}$  NMR (75.4 MHz,  $\text{CDCl}_3$ )  $\delta$  166.4, 148.5, 132.8, 123.0 (q,  $J = 287.8$ ), 120.0, 119.9, 116.4 (q,  $J = 2.0$ ), 109.6, 99.0, 68.5, 62.8 (q,  $J = 32.3$ ), 60.4, 55.6, 54.5, 30.1(3), 27.5.  $^{19}\text{F}$  NMR (282 MHz,  $\text{CDCl}_3$ )  $\delta$  -75.4 (s, 3F). IR (thin film):  $\nu_{\text{max}}$  3377, 2248, 1758, 1603  $\text{cm}^{-1}$ . LRMS (EI):  $m/z$  (%) 343 ( $\text{M}^+$ ), 284 (100), 274. HRMS (EI) Calcd for  $\text{C}_{17}\text{H}_{20}\text{F}_3\text{NO}_3$ : 343.1395. Found: 343.1399.  $[\alpha]_D^{24} = -20$  ( $c$  0.91,  $\text{CHCl}_3$ ) for a 97.6% ee sample. Enantiomeric purity was determined by chiral HPLC analysis (IC, flow 0.7mL/min, Hexane/i-PrOH = 100:1, 214 nm,  $t_R = 8.660$  min (minor) and  $t_R = 10.177$  min (major)): 97.5% ee (before silica gel column chromatography), 97.6% ee (after silica gel column chromatography).

**(R)-Methyl 2-(2-methoxyphenylamino)-6-phenyl-2-(trifluoromethyl)hex-3-ynoate (3j).** 2.5

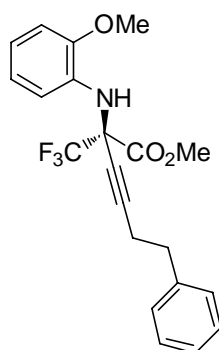

equiv of but-3-ynylbenzene and 1.2 equiv of  $\text{Me}_2\text{Zn}$  were used. The product (101 mg, 86% yield) as a colorless oil was purified with silica gel chromatography (Petroleum ether/Ethyl acetate = 100:1).  $^1\text{H}$  NMR (300 MHz,  $\text{CDCl}_3$ )  $\delta$  7.30 – 7.20 (m, 3H), 7.14 (d,  $J = 7.8$ , 2H), 6.98 (d,  $J = 7.5$ , 1H), 6.86 – 6.76 (m, 3H), 3.87 (s, 3H), 3.86 (s, 3H), 2.78 (m, 2H), 2.50 (td,  $J = 7.2$ , 3.0, 2H).  $^{13}\text{C}$  NMR (75.4 MHz,  $\text{CDCl}_3$ )  $\delta$  166.1, 148.3, 140.0, 132.7, 128.4(2), 128.3(2), 126.3, 123.0 (q,  $J = 288.0$ ), 120.21, 119.8, 115.7 (q,  $J = 1.7$ ), 109.7, 90.3, 70.7, 62.8 (q,  $J = 32.3$ ), 55.6, 54.5, 34.0, 20.9.  $^{19}\text{F}$  NMR (282 MHz,  $\text{CDCl}_3$ )  $\delta$  -75.0 (s, 3F). IR (thin film):  $\nu_{\text{max}}$

3374, 2250, 1756, 1603  $\text{cm}^{-1}$ . LRMS (EI):  $m/z$  (%) 391 ( $\text{M}^+$ ), 332 (100), 91. HRMS (EI) Calcd for  $\text{C}_{21}\text{H}_{20}\text{F}_3\text{NO}_3$ : 391.1395. Found: 391.1398.  $[\alpha]_{\text{D}}^{24} = -6.3$  ( $c$  4.0,  $\text{CHCl}_3$ ) for a 95.6% ee sample. Enantiomeric purity was determined by chiral HPLC analysis (PC-1, flow 0.7 mL/min, Hexane/i-PrOH = 98:2, 214 nm,  $t_{\text{R}} = 11.577$  min (minor) and  $t_{\text{R}} = 12.777$  min (major)): 95.1% ee (before silica gel column chromatography), 95.6% ee (after silica gel column chromatography).

**(R)-Methyl 2-(2-methoxyphenylamino)-2-(trifluoromethyl)dec-3-ynoate (3k).** To a solution of

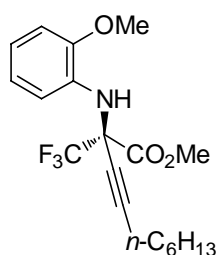

oct-1-yne (2.5 equiv) in anhydrous toluene (1.2 mL) was added  $\text{Me}_2\text{Zn}$  (300  $\mu\text{L}$ , 1.2 M in toluene) under Ar at room temperature. The reaction mixture was heated to 100  $^\circ\text{C}$  for 2h and cooled to room temperature. BINOL type ligand **4h** (6.5 mg, 5 mol%) was then added as a solid in one portion. The reaction mixture was stirred for 2.5 h at room temperature.  $\alpha$ -Trifluoromethyl

ketoimine ester **1a** (0.3 mmol) was then added as an oil with a microliter syringe. The reaction mixture was stirred at the same temperature for 48h. The reaction mixture was quenched with saturated  $\text{NH}_4\text{Cl}$ , and diluted with EtOAc. The aqueous layer was extracted with EtOAc. The combined organic extracts were dried over anhydrous sodium sulfate, and the solvent was removed in vacuo. The residue was purified using chromatography on silica gel (Petroleum ether/Ethyl acetate = 200:1) to give product **3k** 106 mg (95% yield) as a white solid. M.P. 22-23  $^\circ\text{C}$ ;  $^1\text{H}$  NMR (300 MHz,  $\text{CDCl}_3$ )  $\delta$  7.10 (m, 1H), 6.83-6.81 (m, 3H), 3.90 (s, 3H), 3.87 (s, 3H), 2.22 (t,  $J = 6.9$ , 2H), 1.47 (m, 2H), 1.32-1.21 (m, 6H), 0.87 (t,  $J = 6.7$ , 3H).  $^{13}\text{C}$  NMR (75 MHz,  $\text{CDCl}_3$ )  $\delta$  166.3, 148.3, 132.8, 123.1 (q,  $J = 287.9$ ), 120.2, 119.8, 115.8 (q,  $J = 2.2$ ), 109.7, 91.3, 69.9, 62.8 (q,  $J = 32.0$ ), 55.6, 54.5, 31.2, 28.3, 27.7, 22.5, 18.7, 14.0.  $^{19}\text{F}$  NMR (282 MHz,  $\text{CDCl}_3$ )  $\delta$  -75.2 (s, 3F). IR (thin film):  $\nu_{\text{max}}$  3376, 2249, 1758, 1603  $\text{cm}^{-1}$ . LRMS (EI):  $m/z$  (%) 371 ( $\text{M}^+$ ), 312(100), 302. HRMS (EI) Calcd for  $\text{C}_{19}\text{H}_{24}\text{F}_3\text{NO}_3$ : 371.1708. Found: 371.1703.  $[\alpha]_{\text{D}}^{24} = -4.7$  ( $c$  2.3,  $\text{CHCl}_3$ ) for a 95.9% ee sample. Enantiomeric purity was determined by chiral HPLC analysis (Sino-OJ, flow 0.7mL/min, Hexane/i-PrOH = 98:2, 214 nm,  $t_{\text{R}} = 7.447$  min (minor) and  $t_{\text{R}} = 8.877$  min (major)): 96.2% ee (before silica gel column chromatography), 95.9% ee (after silica gel column chromatography).

**(R)-Methyl 2-(2-methoxyphenylamino)-2-(trifluoromethyl)-4-(trimethylsilyl)but-3-ynoate (3l).**

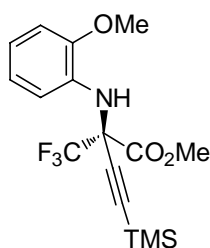

To a solution of ethynyltrimethylsilane (5.0 equiv) in anhydrous toluene (1.2 mL) in a sealed tube was added  $\text{Me}_2\text{Zn}$  (300  $\mu\text{L}$ , 1.2 M in toluene) under Ar at room temperature. After stirring for 12h, BINOL type ligand **4h** (6.5 mg, 5 mol%) was added as a solid in one portion. The reaction mixture was stirred for 2.5 h at room temperature.  $\alpha$ -Trifluoromethyl ketoimine ester **1a** (0.3 mmol) was then added as an oil with a microliter syringe. The reaction mixture was stirred at the same temperature for 48h. The reaction mixture was diluted with EtOAc (100mL) and washed quickly with 20mL 0.1wt%  $\text{H}_2\text{SO}_4$ . The aqueous layer was extracted with EtOAc. The combined organic extracts were dried over anhydrous sodium sulfate, and the solvent was removed in vacuo. The residue was purified using chromatography on silica gel (Petroleum ether/Ethyl acetate = 200:1) to give product **3l** 91 mg (84% yield) as a colorless oil.  $^1\text{H}$  NMR (300 MHz,  $\text{CDCl}_3$ )  $\delta$  7.11 (m, 1H), 6.84 – 6.81 (m, 3H), 3.92 (s, 3H), 3.87 (s, 3H), 0.14 (s, 9H).  $^{13}\text{C}$  NMR (75 MHz,  $\text{CDCl}_3$ )  $\delta$  165.7, 148.4, 132.6, 122.8 (q,  $J = 288.0$ ), 120.1(2), 116.3 (q,  $J = 1.7$ ), 109.7, 96.5, 93.5, 63.2 (q,  $J = 32.2$ ), 55.6, 54.7, -0.8 (3).  $^{19}\text{F}$  NMR (282 MHz,  $\text{CDCl}_3$ )  $\delta$  -74.9 (s, 3F). IR (thin film):  $\nu_{\text{max}}$  3376, 2178, 1760, 1603  $\text{cm}^{-1}$ . LRMS (EI):  $m/z$  (%) 359 ( $\text{M}^+$ ), 300 (100), 73. HRMS (EI) Calcd for  $\text{C}_{16}\text{H}_{20}\text{F}_3\text{NO}_3\text{Si}$ : 359.1165. Found: 359.1166.  $[\alpha]_D^{27} = -25.0$  ( $c$  2.05,  $\text{CHCl}_3$ ) for a 97.7% ee sample. Enantiomeric purity was determined by chiral HPLC Enantiomeric purity was determined by chiral HPLC analysis (Sino-OJ, flow 0.7mL/min, Hexane/i-PrOH = 98:2, 214 nm,  $t_R = 6.437$  min (minor) and  $t_R = 7.777$  min (major)).

**(R)-Methyl 5-(tert-butyldimethylsilyloxy)-2-(2-methoxyphenylamino)-2-(trifluoromethyl)pent-3-ynoate (3m).**

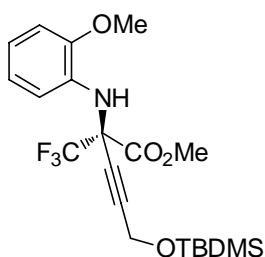

To a solution of tert-butyldimethyl(prop-2-ynoxy)silane (2.5 equiv) in anhydrous toluene (1.2 mL) was added  $\text{Me}_2\text{Zn}$  (300  $\mu\text{L}$ , 1.2 M in toluene) under Ar at room temperature. The reaction mixture was heated to 100  $^\circ\text{C}$  for 2h and cooled to room temperature. Then BINOL type ligand **4h** (6.5 mg, 5 mol%) was added as a solid in one portion. The reaction mixture was stirred for 2.5 h at room temperature.  $\alpha$ -Trifluoromethyl ketoimine ester **1a** (0.3 mmol) was then added as an oil with a microliter syringe. The reaction mixture was stirred at the same temperature for 48h. The reaction mixture was quenched with saturated  $\text{NH}_4\text{Cl}$ , and diluted with EtOAc. The



aqueous layer was extracted with EtOAc. The combined organic extracts were dried over anhydrous sodium sulfate, and the solvent was removed in *vacuo*. The residue was purified using chromatography on silica gel (Petroleum ether/Ethyl acetate = 100:1) to give product **3m** 121 mg, (93% yield) as a white solid. M.P. 86-89 °C; <sup>1</sup>H NMR (300 MHz, CDCl<sub>3</sub>) δ 7.05 (m, 1H), 6.83 (m, 3H), 4.34 (s, 2H), 3.90 (s, 3H), 3.87 (s, 3H), 0.88 (s, 9H), 0.07 (s, 6H). <sup>13</sup>C NMR (75 MHz, CDCl<sub>3</sub>) δ 165.7, 148.2, 132.6, 122.8 (q, *J* = 288.1), 120.3, 120.0, 115.4 (q, *J* = 2.1), 109.8, 88.4, 74.3, 62.8 (q, *J* = 32.0), 55.6, 54.6, 51.5, 25.6(3), 18.1, -5.45(2). <sup>19</sup>F NMR (282 MHz, CDCl<sub>3</sub>) δ -74.8 (s, 3F). IR (thin film): ν<sub>max</sub> 3376, 2180, 1760, 1604 cm<sup>-1</sup>. LRMS (EI): *m/z* (%) 431 (M<sup>+</sup>), 372 (100), 218, 73. HRMS (EI) Calcd for C<sub>20</sub>H<sub>28</sub>F<sub>3</sub>NO<sub>4</sub>Si: 431.1740. Found: 431.1744. [α]<sub>D</sub><sup>24</sup> = -8.5 (*c* 1.8, CHCl<sub>3</sub>) for a 94.7% ee sample. Enantiomeric purity was determined by chiral HPLC analysis (Sino-OJ, flow 0.7 mL/min, Hexane/*i*-PrOH = 98:2, 214 nm, *t*<sub>R</sub> = 6.018 min (minor) and *t*<sub>R</sub> = 8.318 min (major)).

#### Gram-scale catalytic asymmetric synthesis of **3a** and **3m**

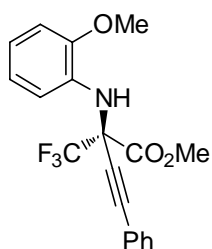

**(R)-Methyl 2-(2-methoxyphenylamino)-4-phenyl-2-(trifluoromethyl)but-3-ynoate (3a).** To a solution of phenylacetylene (0.84 mL, 7.65 mmol, 1.7 equiv) in anhydrous toluene (18 mL) was added Me<sub>2</sub>Zn (4.5 mL, 5.4 mmol, 1.2 M in toluene) under Ar at room temperature. After stirring for 1h, BINOL type ligand **4h** (97.5 mg, 5 mol%) was added as a solid in one portion. The reaction mixture

was stirred for 2.5 h at room temperature. α-Trifluoromethyl ketoimine ester **1a** (1.18 g, 4.5 mmol) was then added as an oil with a microliter syringe. The reaction mixture was stirred at room temperature for 48h. The reaction mixture was quenched with saturated NH<sub>4</sub>Cl, and diluted with EtOAc. The aqueous layer was extracted with EtOAc. The combined organic extract was dried over anhydrous sodium sulfate, and the solvent was removed in *vacuo*. The residue was purified using chromatography on silica gel (Petroleum ether/Ethyl acetate = 100:1) to give product **3a** (1.50g, 92% yield, 97% ee) as a colorless oil. Enantiomeric purity was determined by chiral HPLC analysis (AD-H, flow 0.7mL/min, Hexane/*i*-PrOH = 98:2, 214 nm, *t*<sub>R</sub> = 7.127 min (major) and *t*<sub>R</sub> = 8.877 min (minor)): 97% ee (after silica gel chromatography).

**(R)-Ethyl 5-(tert-butyldimethylsilyloxy)-2-(2-methoxyphenylamino)-2-(trifluoromethyl)pent-3-ynoate (3m).**

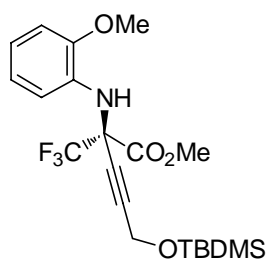

To a solution of tert-butyldimethyl(prop-2-ynoxy)silane (2.0 mL, 9.575 mmol, 2.5 equiv) in anhydrous toluene (15 mL) was added Me<sub>2</sub>Zn (3.83 mL, 4.6 mmol, 1.2 M in toluene) under Ar at room temperature. The reaction mixture was heated to 100 °C for 2 h and cooled to room temperature. Then BINOL type ligand **4h** (83 mg, 5 mol%) was added as a solid in one portion.

The reaction mixture was stirred for 2.5 h at room temperature. α-Trifluoromethyl ketoimine ester **1a** (1.0 g, 3.83 mmol) was then added as an oil with a microliter syringe. The reaction mixture was stirred at the same temperature for 48h. The reaction mixture was quenched with saturated NH<sub>4</sub>Cl, and diluted with EtOAc. The aqueous layer was extracted with EtOAc. The combined organic extract was dried over anhydrous sodium sulfate, and the solvent was removed in *vacuo*. The residue was purified using chromatography on silica gel (Petroleum ether/Ethyl acetate = 100:1) to give product **3m** (1.54 g, 93% yield, 96% ee) as a colorless oil. Enantiomeric purity was determined by chiral HPLC analysis (Sino-OJ, flow 0.7 mL/min, Hexane/i-PrOH = 98:2, 214 nm, t<sub>R</sub> = 6.52 min (minor) and t<sub>R</sub> = 9.76 min (major)): 96% ee (after silica gel chromatography).

**Synthesis of compound 6.**

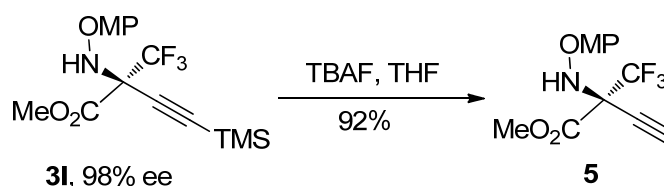

**(R)-methyl 2-((2-methoxyphenyl)amino)-2-(trifluoromethyl)but-3-ynoate (5).** To a solution of **3l** (650 mg, 1.8 mmol) in THF was added TBAF (1.0 M in THF, 2.2 mL, 2.2 mmol) immediately at 0 °C. After stirring for 1 min, the reaction mixture was quenched with saturated aqueous NH<sub>4</sub>Cl. The reaction mixture was extracted with ethyl acetate, washed with brine, dried over anhydrous sodium sulfate, and the solvent was removed in *vacuo*. The residue was purified using chromatography on silica gel (Petroleum ether/Ethyl acetate = 100:1) to give alkyne **5** in 92% yield (475 mg) as an oil. <sup>1</sup>H NMR (300 MHz, CDCl<sub>3</sub>) δ 7.06 (m, 1H), 6.85 (m, 3H), 5.62 (s, 1H), 3.93 (s, 3H), 3.88 (s, 3H), 2.69 (s, 1H). <sup>13</sup>C NMR (100 MHz, CDCl<sub>3</sub>) δ 165.3, 148.4, 132.4, 122.7 (q, J =

286.3), 120.3, 115.5, 109.9, 78.3, 73.4, 62.8 (q,  $J = 25.9$ ), 55.6, 54.8.  $^{19}\text{F}$  NMR (282 MHz,  $\text{CDCl}_3$ )  $\delta$  -74.2 (s, 3F). IR (thin film):  $\nu_{\text{max}}$  3382, 3283, 2127, 1760  $\text{cm}^{-1}$ . LRMS (EI):  $m/z$  (%) 287 ( $\text{M}^+$ ), 228 (100), 144. HRMS (EI) Calcd for  $\text{C}_{13}\text{H}_{12}\text{F}_3\text{NO}_3$ : 287.0769. Found: 287.0770.  $[\alpha]_{\text{D}}^{25} = -9.1$  ( $c$  3.2,  $\text{CHCl}_3$ ).

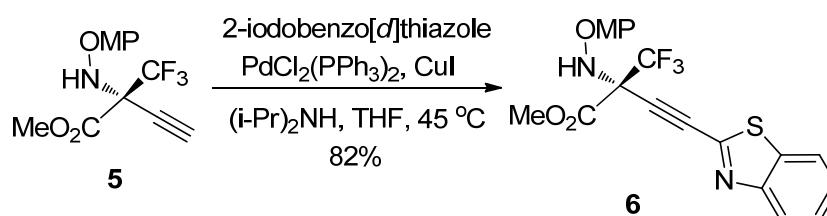

**(*R*)-methyl 4-(benzo[*d*]thiazol-2-yl)-2-((2-methoxyphenyl)amino)-2-(trifluoromethyl)but-3**

**-ynoate (6).** To a mixture of **5** (178 mg, 0.62 mmol) and 2-iodobenzo[*d*]thiazole (162 mg, 0.62 mmol) in THF (2 mL) was added (*i*-Pr)<sub>2</sub>NH (2 mL), followed by PdCl<sub>2</sub>(PPh<sub>3</sub>)<sub>2</sub> (19 mg, 0.03 mmol) and CuI (2.4 mg, 0.012 mmol) at room temperature under N<sub>2</sub>. The reaction mixture was heated to 45 °C and stirred for 5 h. The reaction mixture was cooled to room temperature and water was added. The reaction mixture was extracted with EtOAc, dried over Na<sub>2</sub>SO<sub>4</sub>, and concentrated. The residue was purified using chromatography on silica gel (Petroleum ether/Ethyl acetate = 30:1) to give alkyne **6** in 82% yield (214 mg) as a yellow solid. The solid was recrystallized with Petroleum ether/Ethyl acetate to give a white solid. M.P. 77-79 °C;  $^1\text{H}$  NMR (300 MHz,  $\text{CDCl}_3$ )  $\delta$  8.08 (d,  $J = 7.8$  Hz, 1H), 7.86 (d,  $J = 8.1$  Hz, 1H), 7.50 (m, 2H), 7.14 (m, 1H), 6.88 (m, 3H), 5.79 (br, 1H), 4.00 (s, 3H), 3.90 (s, 3H);  $^{13}\text{C}$  NMR (100 MHz,  $\text{CDCl}_3$ )  $\delta$  164.8, 152.5, 148.6, 146.3, 135.3, 132.2, 126.9, 126.8, 123.9, 122.6 (q,  $J = 289.3$ ), 121.3, 120.7, 120.5, 115.8 (q,  $J = 2.0$ ), 109.9, 85.3, 82.5, 63.6 (q,  $J = 31.9$ ), 55.6, 55.1.  $^{19}\text{F}$  NMR (282 MHz,  $\text{CDCl}_3$ )  $\delta$  -74.1 (s, 3F). IR (thin film):  $\nu_{\text{max}}$  3356, 1764, 1601  $\text{cm}^{-1}$ . LRMS (EI):  $m/z$  (%) 420 ( $\text{M}^+$ ), 361 (100), 362, 77. HRMS (EI) Calcd for  $\text{C}_{20}\text{H}_{15}\text{F}_3\text{N}_2\text{O}_3\text{S}$ : 420.0755. Found: 420.0758.  $[\alpha]_{\text{D}}^{26} = 18$  ( $c$  2.0,  $\text{CHCl}_3$ ).

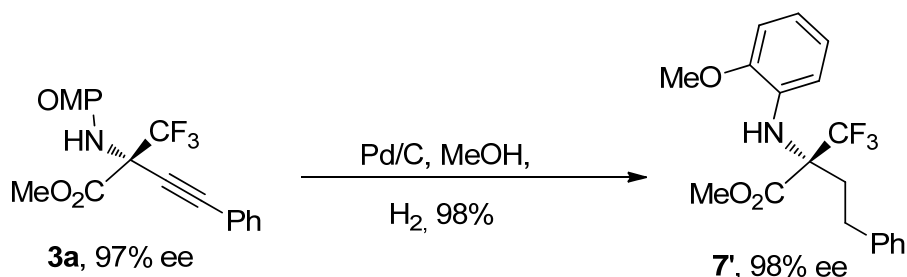

**(R)-Methyl 2-(2-methoxyphenylamino)-4-phenyl-2-(trifluoromethyl)butanoate (7').** To a solution of **3a** (210 mg, 0.578 mmol) in MeOH (30 mL) was added Pd/C 10% (40 mg). The reaction mixture was stirred under H<sub>2</sub> (1 atm) for 24 h. The reaction mixture was filtered through a silica gel pad, washed with CH<sub>2</sub>Cl<sub>2</sub>, and filtrate was concentrated. The residue was purified using chromatography on silica gel (Petroleum ether/Ethyl acetate = 100:1) to give hydrogenated product (209 mg, 98%) as a colorless oil. <sup>1</sup>H NMR (300 MHz, CDCl<sub>3</sub>) δ 7.25 – 7.12 (m, 3H), 6.92 – 6.84 (m, 6H), 3.91 (s, 3H), 3.85 (s, 3H), 2.75 – 2.64 (m, 1H), 2.55 – 2.23 (m, 3H). <sup>13</sup>C NMR (100 MHz, CDCl<sub>3</sub>) δ 169.0, 148.6, 140.1, 133.2, 128.4, 128.3, 126.2, 124.8 (q, *J* = 289.3), 120.7, 119.7, 115.3 (q, *J* = 3.7), 110.1, 67.5 (q, *J* = 28.0), 55.8, 53.7, 31.1, 29.3. <sup>19</sup>F NMR (282 MHz, CDCl<sub>3</sub>) δ -73.3 (s, 3F). IR (thin film): ν<sub>max</sub> 3371, 1750, 1603 cm<sup>-1</sup>. LRMS (EI): *m/z* (%) 367 (M<sup>+</sup>), 91 (100), 308. HRMS (EI) Calcd for C<sub>19</sub>H<sub>20</sub>F<sub>3</sub>NO<sub>3</sub>: 367.1395. Found: 367.1392. [α]<sub>D</sub><sup>29</sup> = 62 (*c* 0.50, CHCl<sub>3</sub>) for a 98% ee sample. Enantiomeric purity was determined by chiral HPLC analysis (Sino-AD, flow 0.5 mL/min, Hexane/*i*PrOH = 98:2, 214 nm, *t*<sub>R</sub> = 9.127 min (minor) and *t*<sub>R</sub> = 10.477 min (major)).

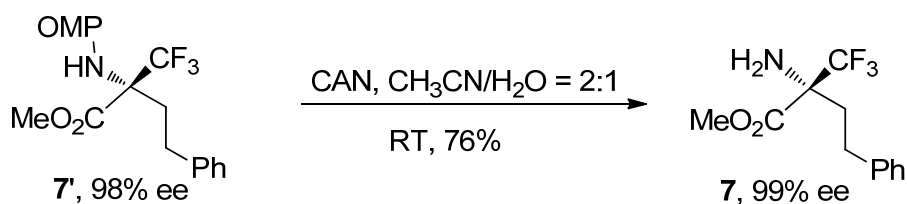

**(R)-Methyl 2-amino-4-phenyl-2-(trifluoromethyl)butanoate (7).** To a solution of Cerium(IV) Ammonium Nitrate (CAN, 396mg, 5.0 equiv) in MeCN / H<sub>2</sub>O (6 mL, 1:1) at 0 °C was added a solution of **5'** (53 mg, 0.144 mmol, 1equiv, 98% ee) in MeCN (3 mL). The reaction mixture was stirred at 0 °C for 1h and quenched with saturated aqueous NaHSO<sub>3</sub> (1 mL). The reaction mixture was extracted with EtOAc. The combined organic extract was washed with brine, dried over anhydrous sodium sulfate, and the solvent was removed in *vacuo*. The residue was purified using chromatography on Al<sub>2</sub>O<sub>3</sub> (100% CH<sub>2</sub>Cl<sub>2</sub>) to give product **7** (29 mg, 76% yield) as a brown oil. <sup>1</sup>H

NMR (300 MHz, CDCl<sub>3</sub>)  $\delta$  7.33 – 7.26 (m, 2H), 7.24 – 7.16 (m, 3H), 3.80 (s, 3H), 2.85 – 2.79 (m, 1H), 2.57 – 2.34 (m, 2H), 1.99 (m, 1H), 1.90 (br, 2H). <sup>13</sup>C NMR (75 MHz, CDCl<sub>3</sub>)  $\delta$  168.9, 140.2, 128.4 (2), 128.3 (2), 126.2, 124.8 (q,  $J$  = 284.9), 64.6 (q,  $J$  = 27.1), 53.3, 34.4, 29.4. <sup>19</sup>F NMR (282 MHz, CDCl<sub>3</sub>)  $\delta$  -78.3 (s, 3F). IR (thin film):  $\nu_{\text{max}}$  3420, 3344, 1748, 1604 cm<sup>-1</sup>. LRMS (EI):  $m/z$  (%) 261 (M<sup>+</sup>), 91 (100), 202. HRMS (EI) Calcd for C<sub>12</sub>H<sub>14</sub>F<sub>3</sub>NO<sub>2</sub>: 261.0977. Found: 261.0978.  $[\alpha]_{\text{D}}^{29}$  = -26.5 ( $c$  0.493, CHCl<sub>3</sub>). Enantiomeric purity was determined by chiral HPLC analysis (PC-2, flow 0.7 mL/min, Hexane/*i*PrOH = 50:50, 214 nm,  $t_{\text{R}}$  = 5.402 min (minor) and  $t_{\text{R}}$  = 6.238 min (major)).

## References

- 1) Wu, T. R.; Shen, L.; Chong, J. M. *Org. Lett.* **2004**, *6*, 2701-2704.
- 2) Maruoka, K.; Yamamoto, H. *Bull. Chem. Soc. Jpn.* **1988**, *61*, 2975-2976.
- 3) Pagliai, F.; Pirali, T.; Grosso, E. D.; Brisco, R. D.; Tron, G. C.; Sorba, G.; Genazzani, A. A. *J. Med. Chem.* **2006**, *49*, 467-470.
- 4) Hemming, K.; Bevan, M. J.; Loukou, C.; Patel, S. D.; Renaudeau, D. *Synlett* **2000**, 1565-1568
- 5) a) Watanabe, H.; Hashizume, Y.; Uneyama, K. *Tetrahedron Lett.* **1992**, *33*, 4333-4336; b) Abe, H.; Amii, H.; Uneyama, K. *Org. Lett.* **2001**, *3*, 313-315.

**Methyl 3,3,3-trifluoro-2-(2-methoxyphenylimino)propanoate (1).**

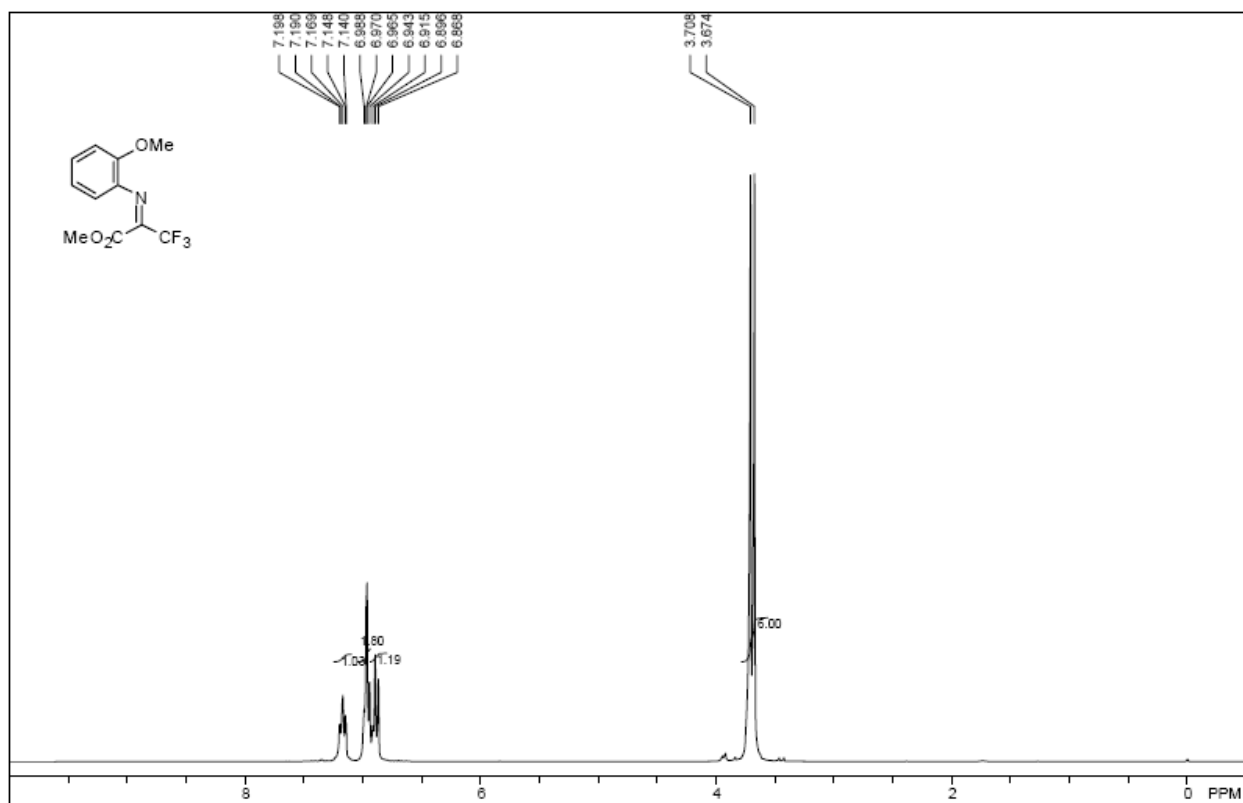

|                                                             |               |             |             |              |                             |  |
|-------------------------------------------------------------|---------------|-------------|-------------|--------------|-----------------------------|--|
| USER: sioc -- DATE: Nov 15 14:42:25 2009 China Standard Tim |               |             |             |              |                             |  |
| F1: 300.130                                                 | F2: 1.000     | SW1: 7485   | OF1: 1499.3 | PTS1d: 16384 |                             |  |
| EX: zg30                                                    | PW: 10.2 usec | PD: 1.0 sec | NA: 8       | LB: 0.3      | Nuts - \$CF3-OMP -2-5zhuH.1 |  |

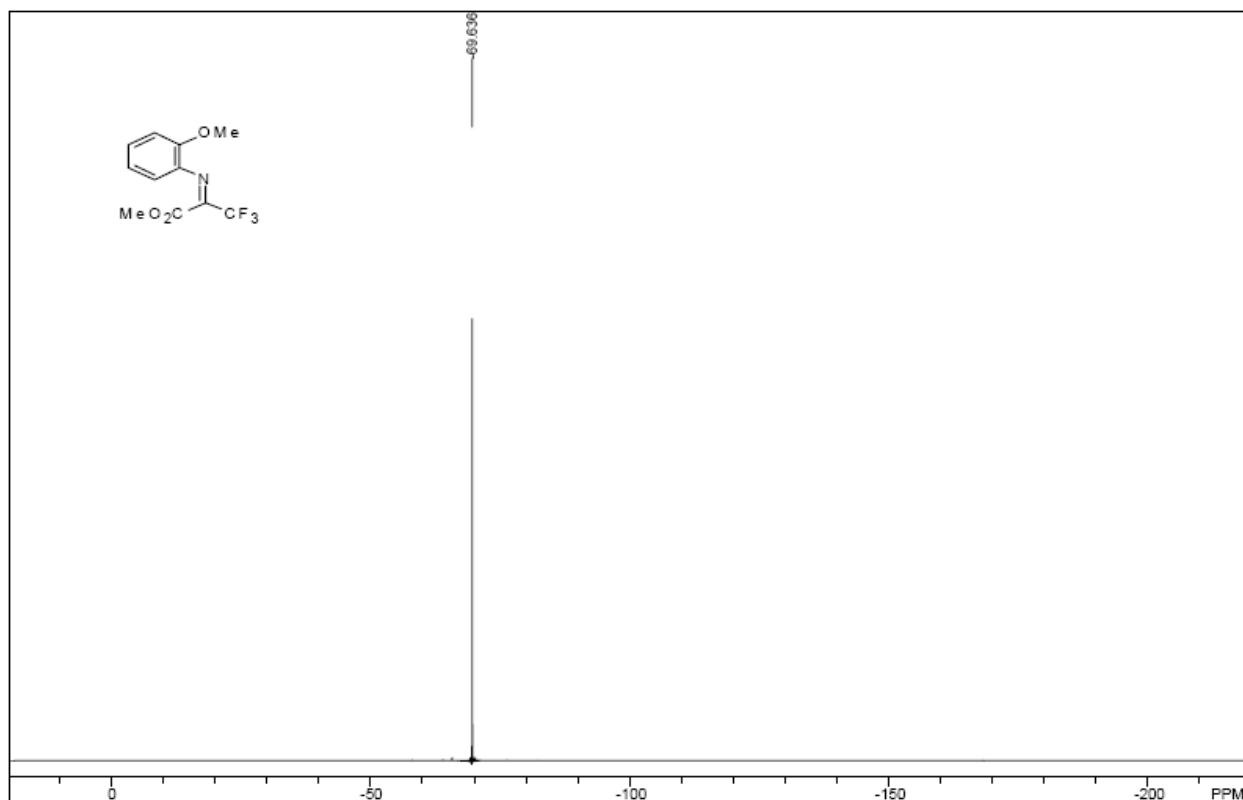

|                                                             |               |             |               |              |                             |  |
|-------------------------------------------------------------|---------------|-------------|---------------|--------------|-----------------------------|--|
| USER: sioc -- DATE: Nov 15 14:44:15 2009 China Standard Tim |               |             |               |              |                             |  |
| F1: 282.404                                                 | F2: 1.000     | SW1: 67568  | OF1: -28240.2 | PTS1d: 65536 |                             |  |
| EX: zg30                                                    | PW: 12.1 usec | PD: 1.0 sec | NA: 16        | LB: 0.3      | Nuts - \$CF3-OMP -2-5zhuF.1 |  |

**Methyl 3,3,3-trifluoro-2-(4-methoxyphenylimino)propanoate (1')**

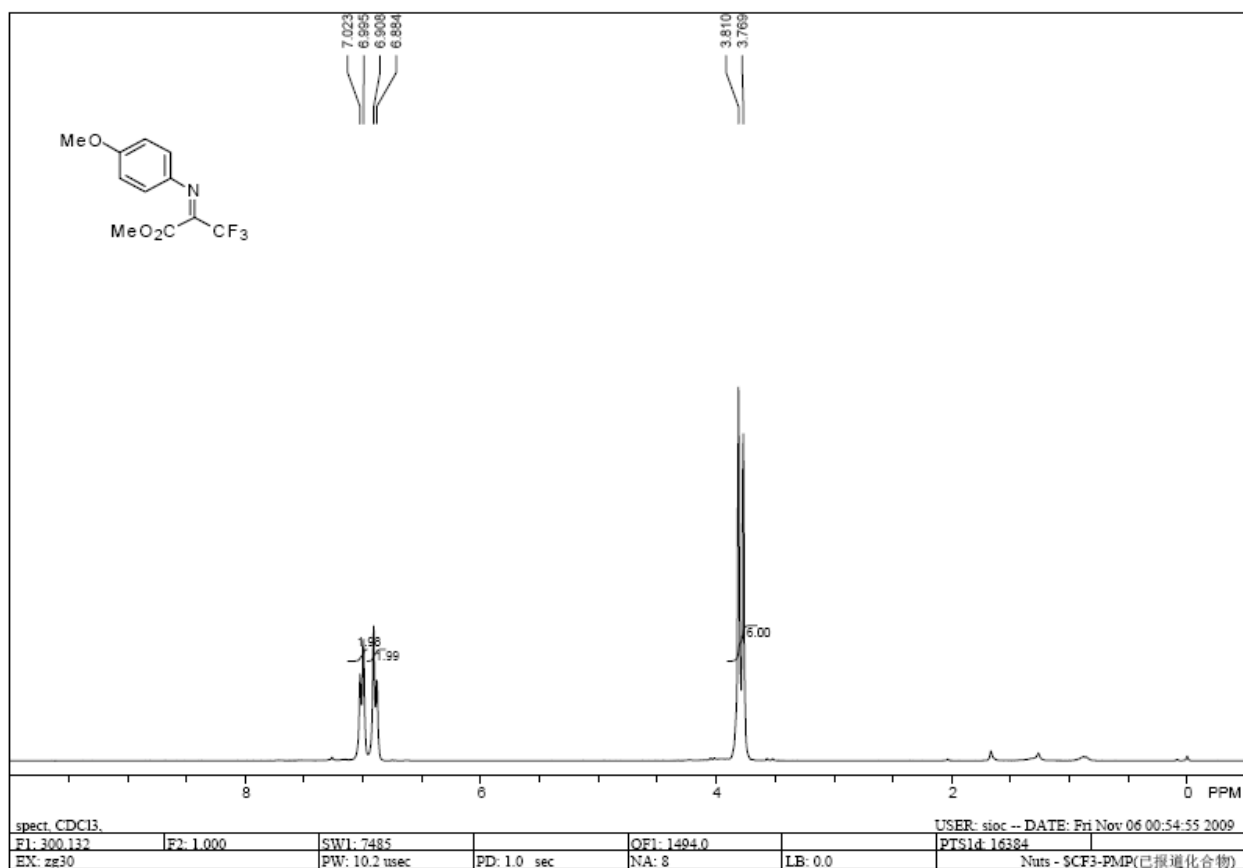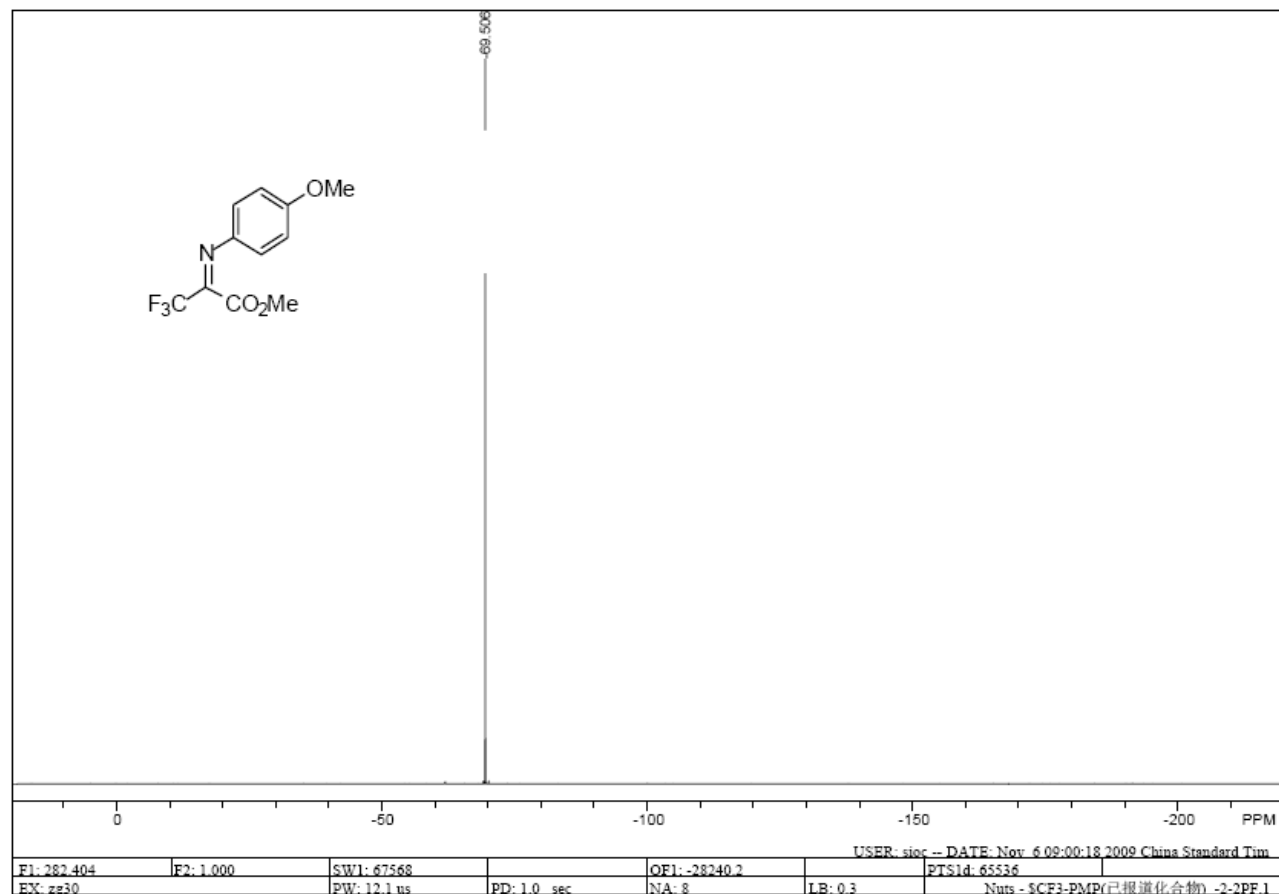

**(R)-Methyl 2-(2-methoxyphenylamino)-4-phenyl-2-(trifluoromethyl)but-3-ynoate (3a).**

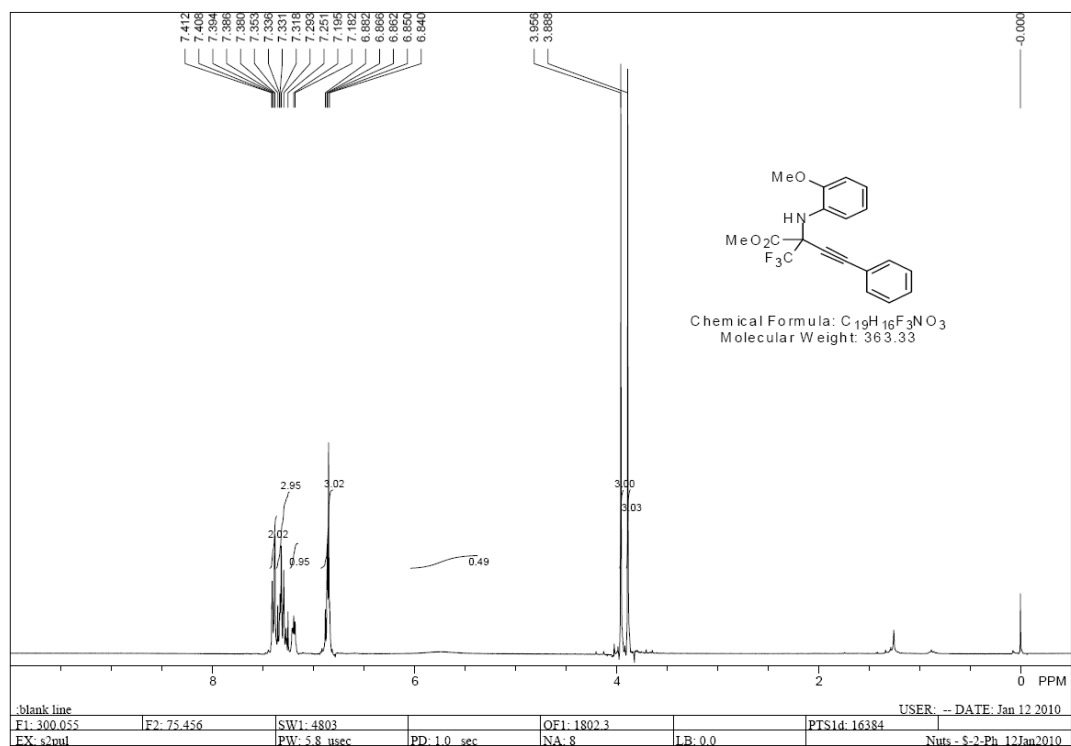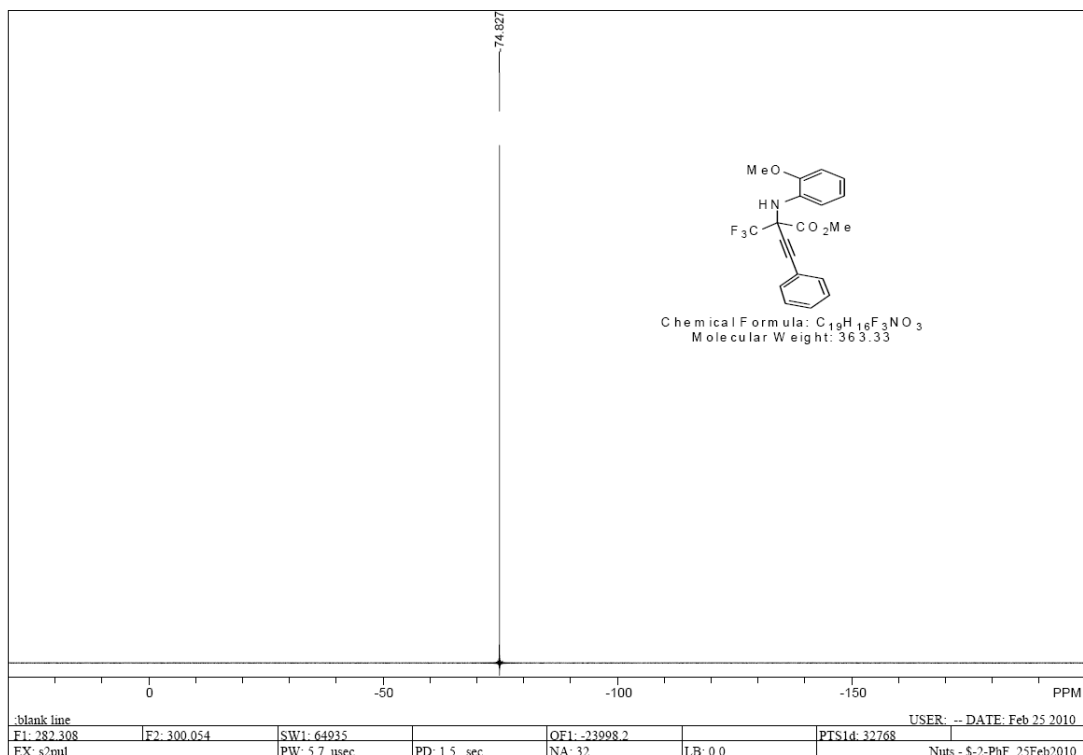



2008187-2-Ph-c  
2008187-2-Ph

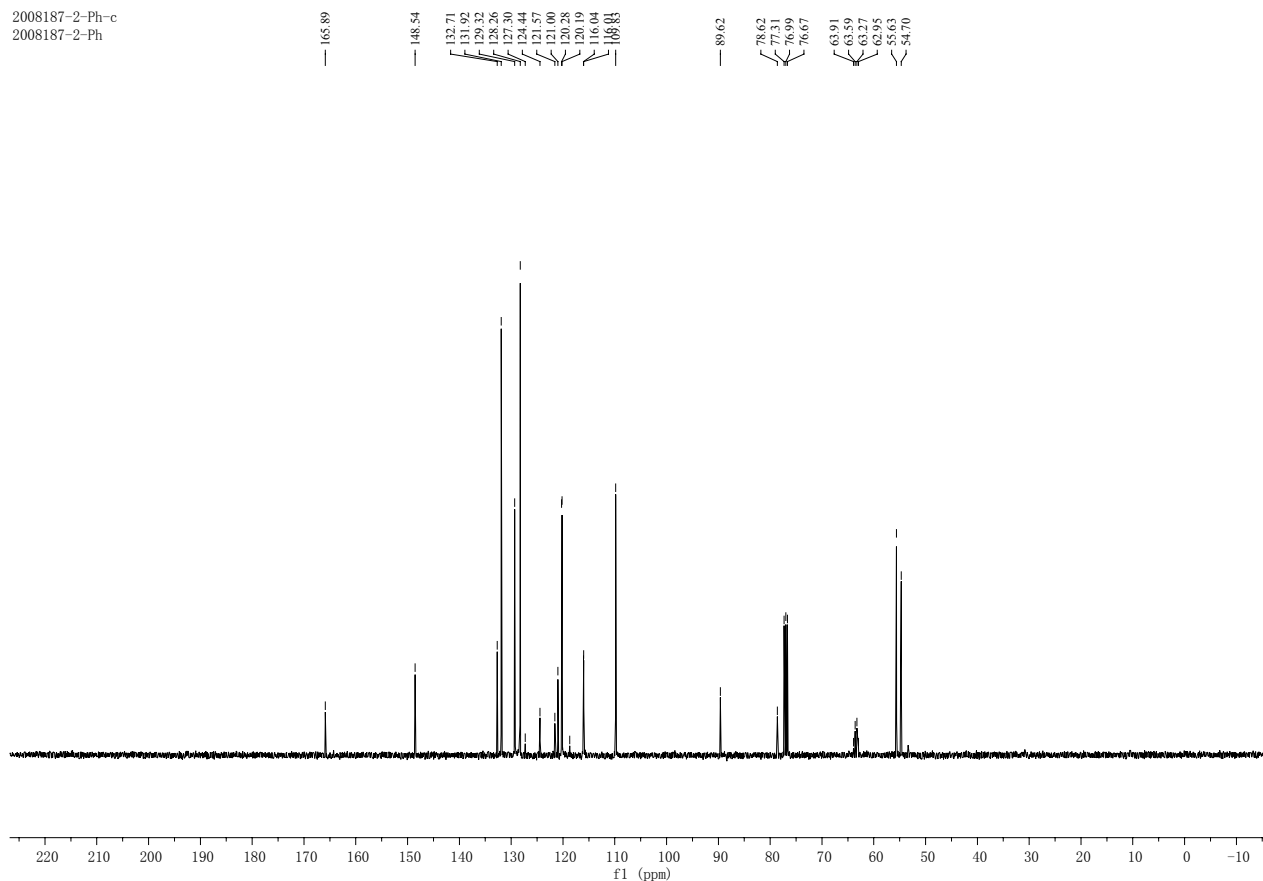

## Chiral HPLC Analysis of 3a

### HPLC Report

Sample Name:

Data File:hgc-2-10cz+-.che

Operator: .

Date:2010-12-13

Time:08:48

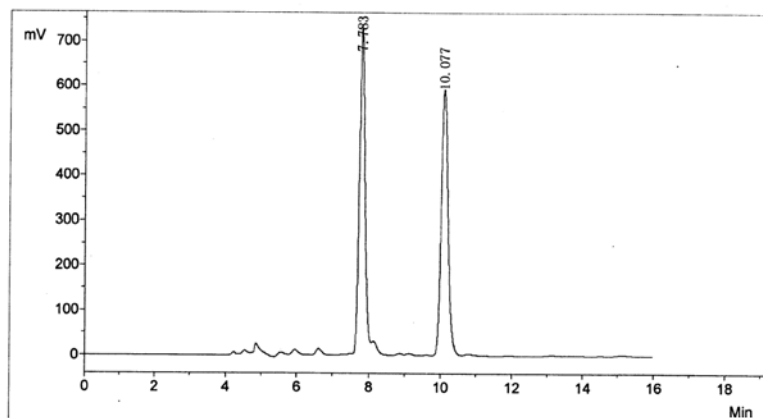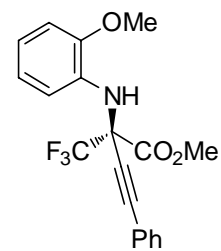

| No.   | PeakNo | ID. Name | R. Time | PeakHeight | PeakArea   | PerCent  |
|-------|--------|----------|---------|------------|------------|----------|
| 1     | 1      |          | 7.783   | 708231.4   | 7483020.6  | 48.3250  |
| 2     | 2      |          | 10.077  | 577478.7   | 8001747.1  | 51.6750  |
| Total |        |          |         | 1285710.1  | 15484767.7 | 100.0000 |

## HPLC Report

Sample Name: Data File:hgc-4-54qo. che  
Operator: Date:2010-12-13  
Time:12:19

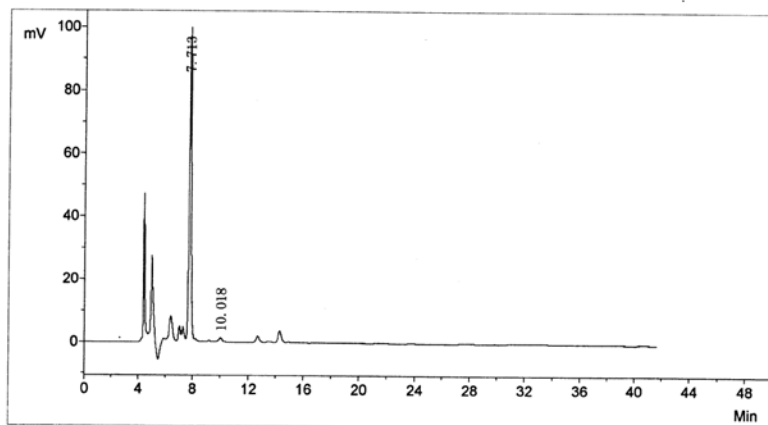

| No.   | PeakNo | ID. Name | R. Time | PeakHeight | PeakArea  | PerCent  |
|-------|--------|----------|---------|------------|-----------|----------|
| 1     | 1      |          | 7.713   | 82537.2    | 1035689.0 | 99.1575  |
| 2     | 2      |          | 10.018  | 769.1      | 8799.9    | 0.8425   |
| Total |        |          |         | 83306.3    | 1044488.9 | 100.0000 |

before column chromatography

## HPLC Report

Sample Name: Data File:HGC-4-54T8. che  
Operator: Date:2010-12-13  
Time:11:02

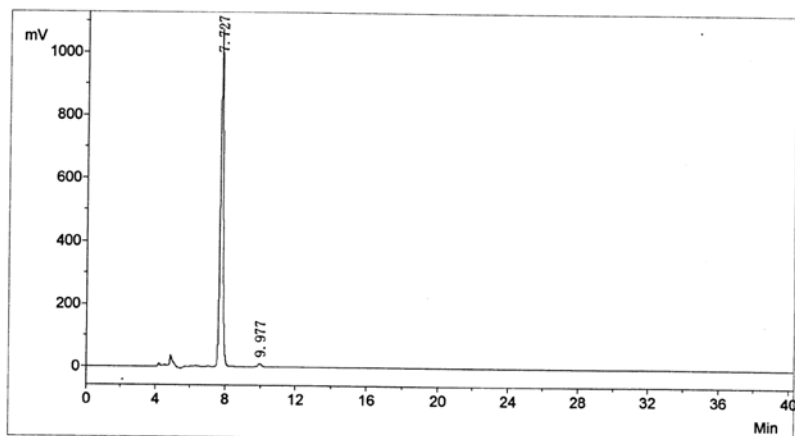

| No.   | PeakNo | ID. Name | R. Time | PeakHeight | PeakArea   | PerCent  |
|-------|--------|----------|---------|------------|------------|----------|
| 1     | 1      |          | 7.727   | 1071819.7  | 12329029.5 | 98.6435  |
| 2     | 2      |          | 9.977   | 10604.4    | 169541.0   | 1.3565   |
| Total |        |          |         | 1082424.1  | 12498570.5 | 100.0000 |

after column chromatography

**(R)-Methyl 2-(4-methoxyphenylamino)-4-phenyl-2-(trifluoromethyl)but-3-ynoate (3a').**

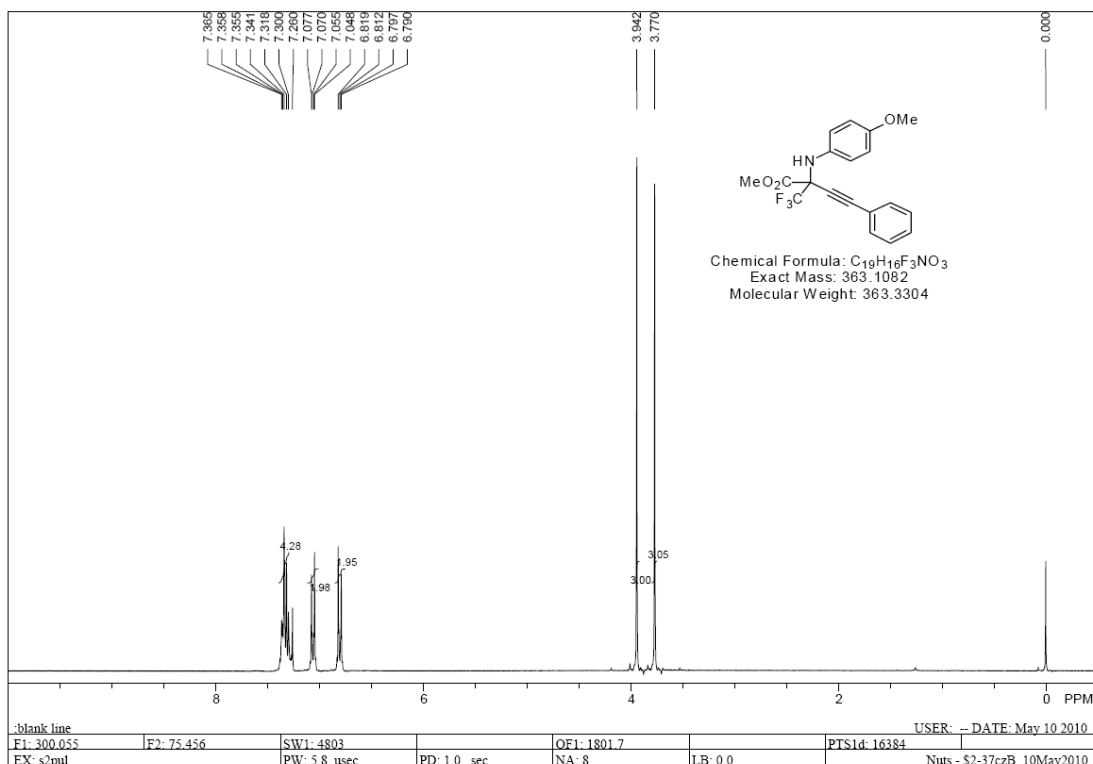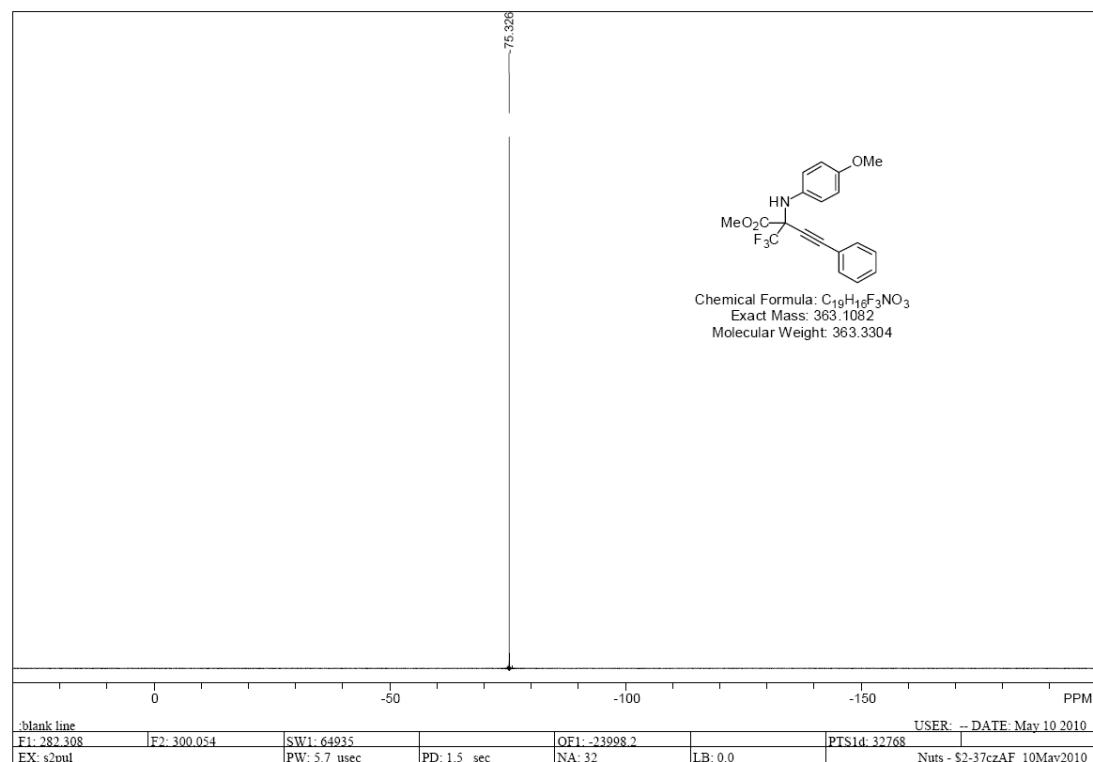

37CZA-C  
37CZA

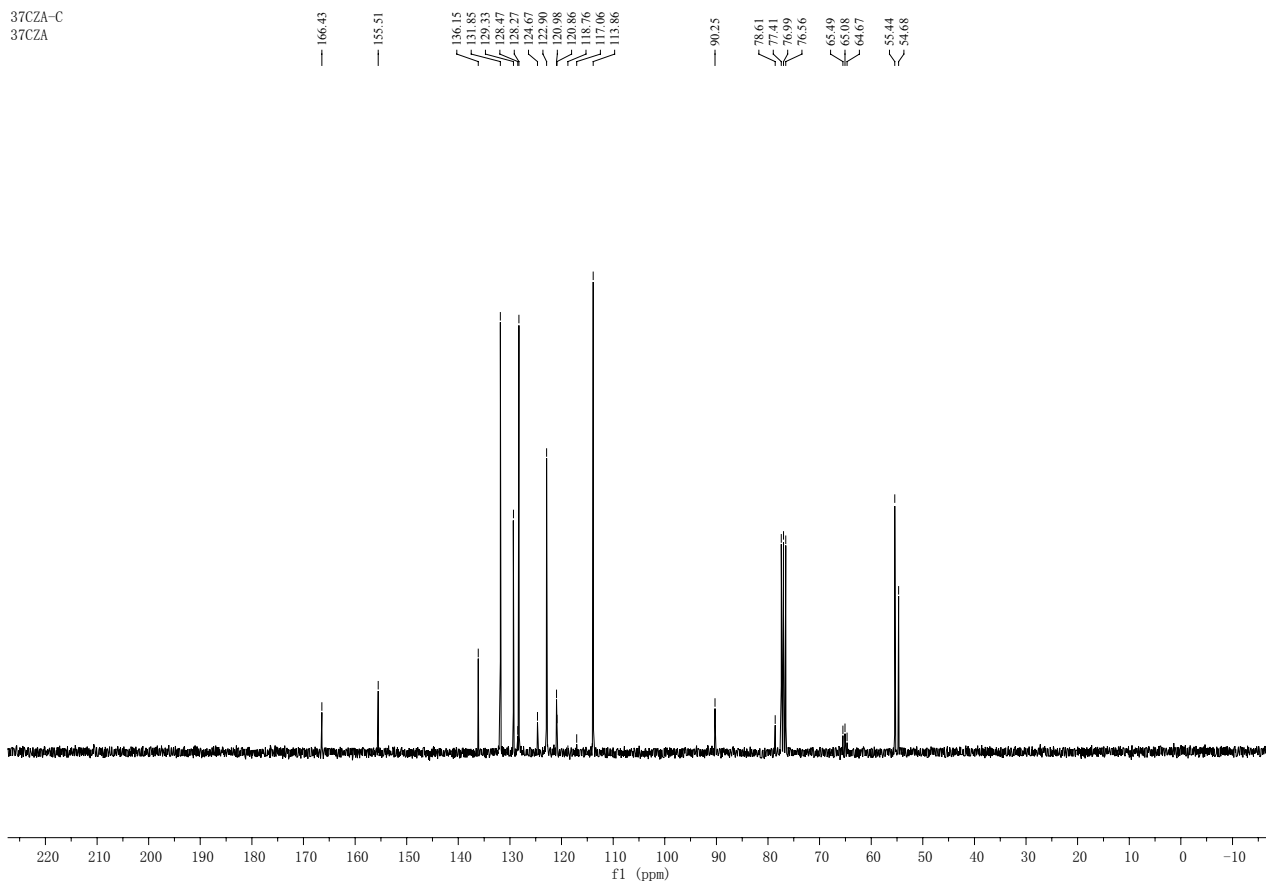

## Chiral HPLC Analysis of 3a'

### HPLC Report

Sample Name: Data File:HGC-2-42+-...che  
Operator: Date:2010-12-21  
Time:13:46

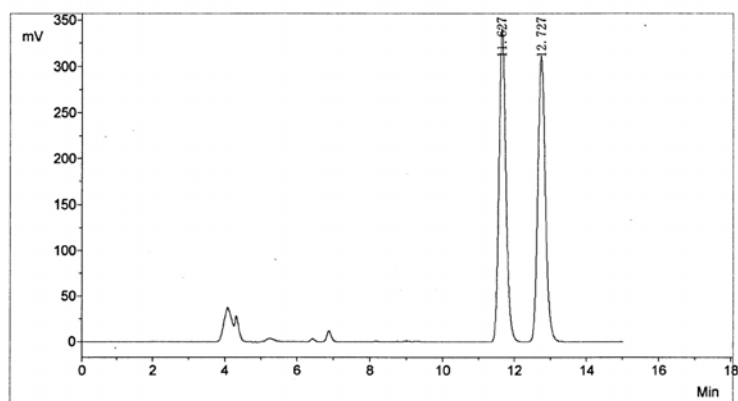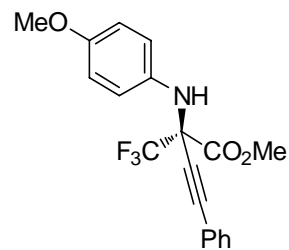

| No.   | PeakNo | ID. Name | R. Time | PeakHeight | PeakArea  | PerCent  |
|-------|--------|----------|---------|------------|-----------|----------|
| 1     | 1      |          | 11.627  | 328618.8   | 4572404.3 | 50.0281  |
| 2     | 2      |          | 12.727  | 309024.3   | 4567272.3 | 49.9719  |
| Total |        |          |         | 637643.1   | 9139676.6 | 100.0000 |

## HPLC Report

Sample Name: Data File:HGC-4-71-1Q.che  
Operator: Date:2010-12-21  
Time:14:20

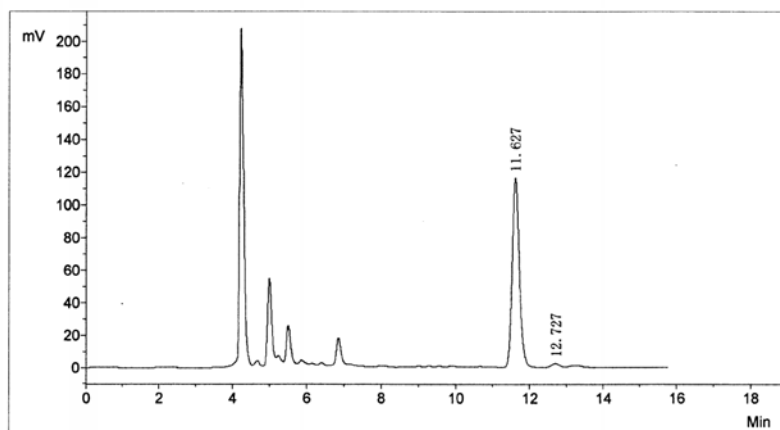

| No.   | PeakNo | ID. Name | R. Time | PeakHeight | PeakArea  | PerCent  |
|-------|--------|----------|---------|------------|-----------|----------|
| 1     | 1      |          | 11.627  | 116108.2   | 1563868.0 | 98.0425  |
| 2     | 2      |          | 12.727  | 2315.2     | 31224.2   | 1.9575   |
| Total |        |          |         | 118423.4   | 1595092.3 | 100.0000 |

before column chromatography

## HPLC Report

Sample Name: Data File:HGC-4-71-1T.che  
Operator: Date:2010-12-21  
Time:14:04

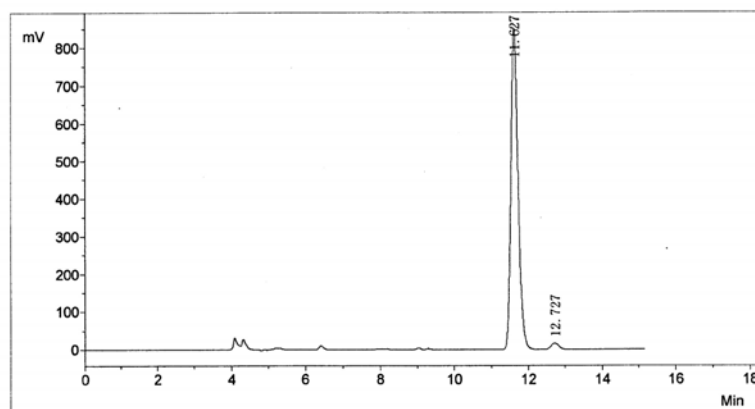

| No.   | PeakNo | ID. Name | R. Time | PeakHeight | PeakArea   | PerCent  |
|-------|--------|----------|---------|------------|------------|----------|
| 1     | 1      |          | 11.627  | 845833.0   | 11561988.3 | 97.8288  |
| 2     | 2      |          | 12.727  | 17106.5    | 256607.8   | 2.1712   |
| Total |        |          |         | 862939.5   | 11818596.0 | 100.0000 |

after column chromatography

**(R)-Methyl 2-(2-methoxyphenylamino)-4-(4-propylphenyl)-2-(trifluoromethyl)but-3-ynoate (3b).**

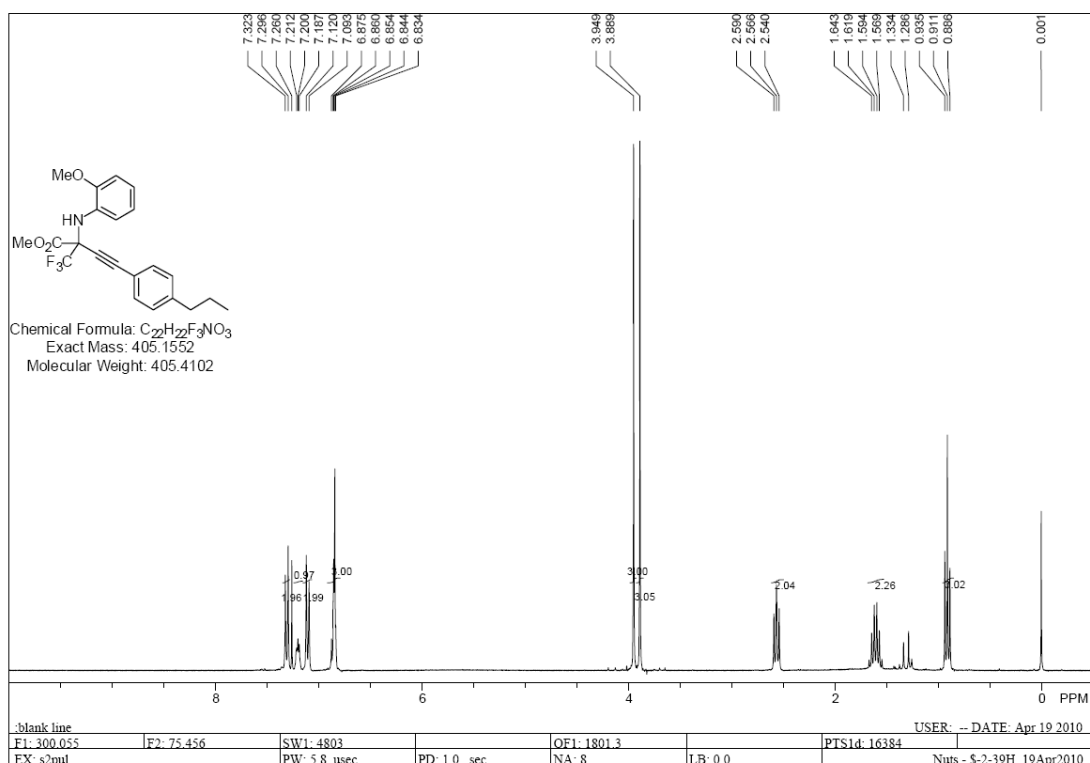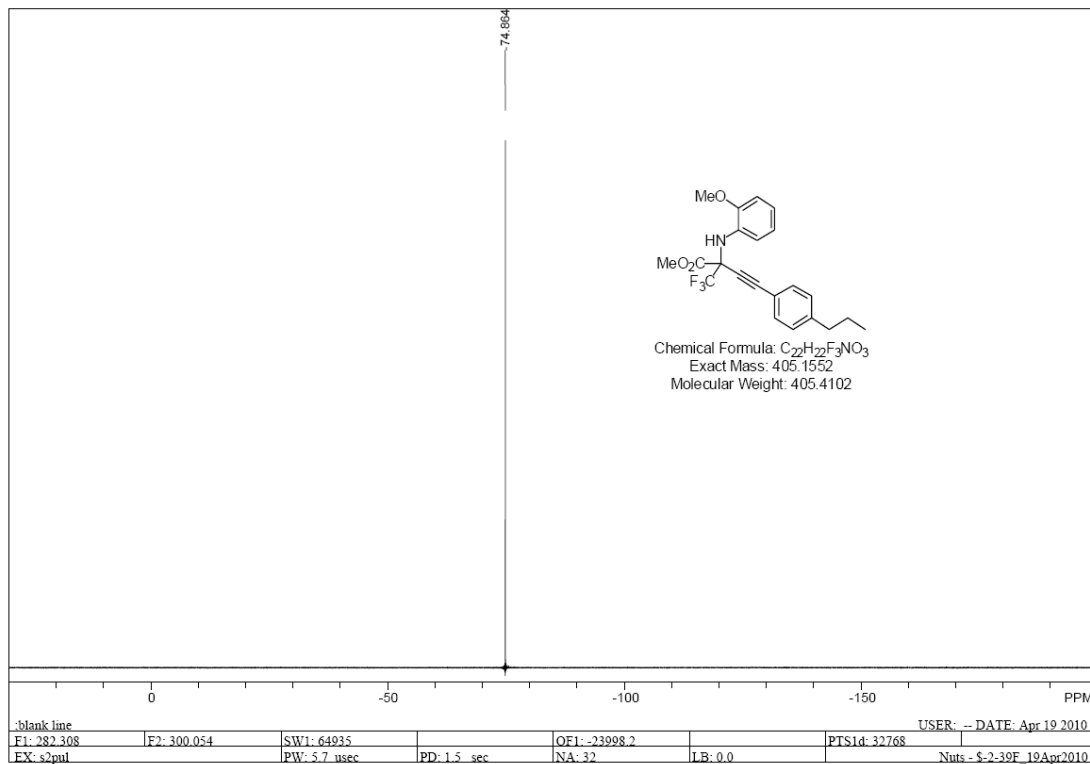

2-39-c  
2-39

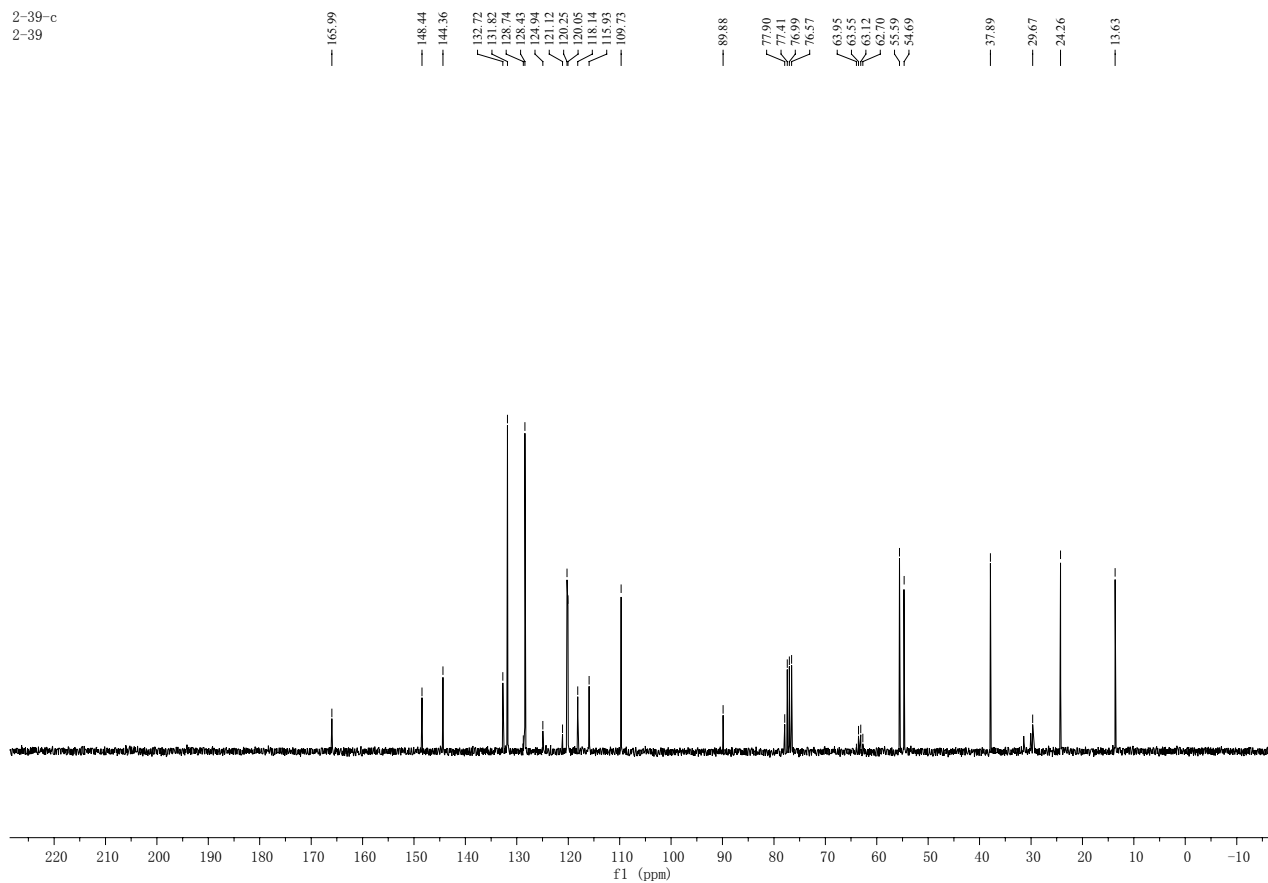

## Chiral HPLC Analysis of 3b

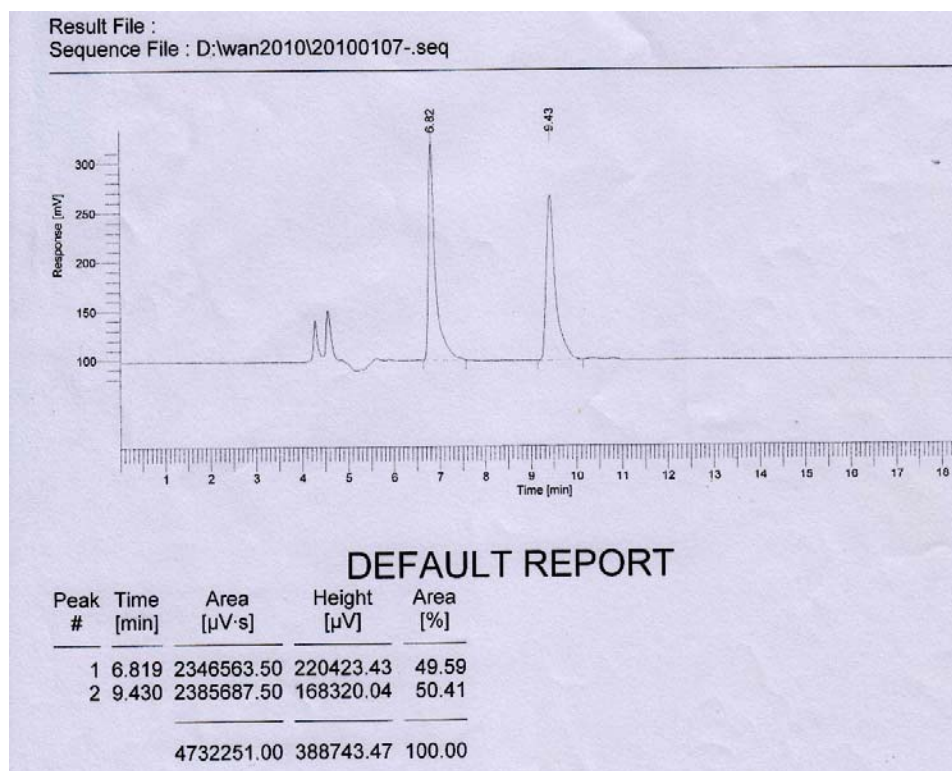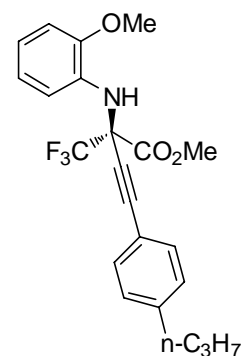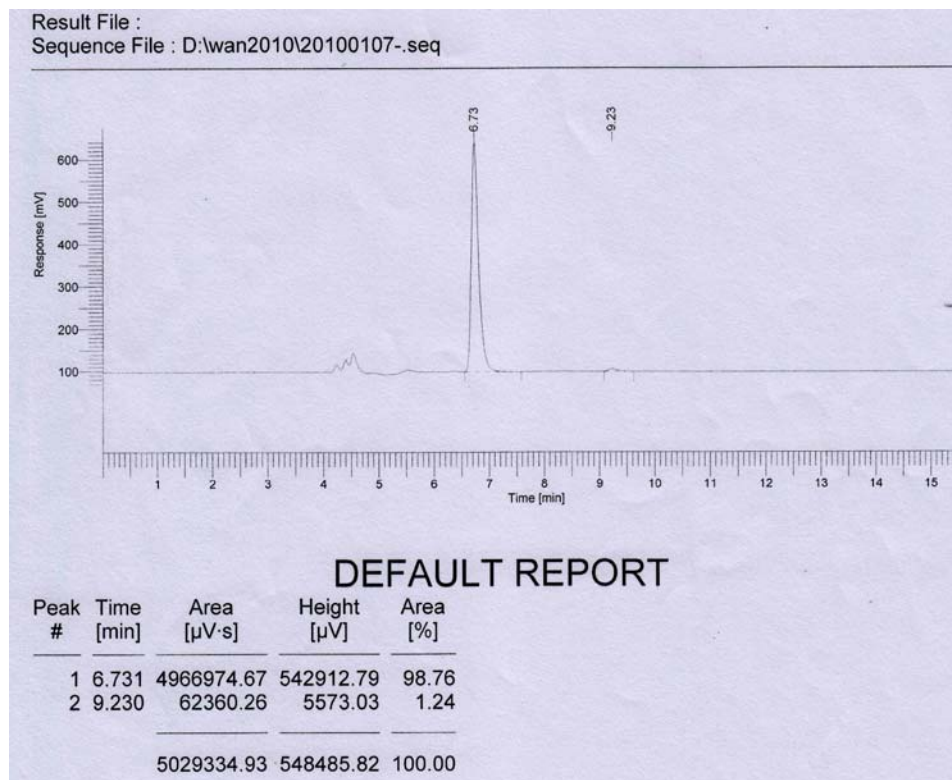

after column chromatography



**(R)-Methyl 4-(4-methoxyphenyl)-2-(2-methoxyphenylamino)-2-(trifluoromethyl)but-3-ynoate (3c).**

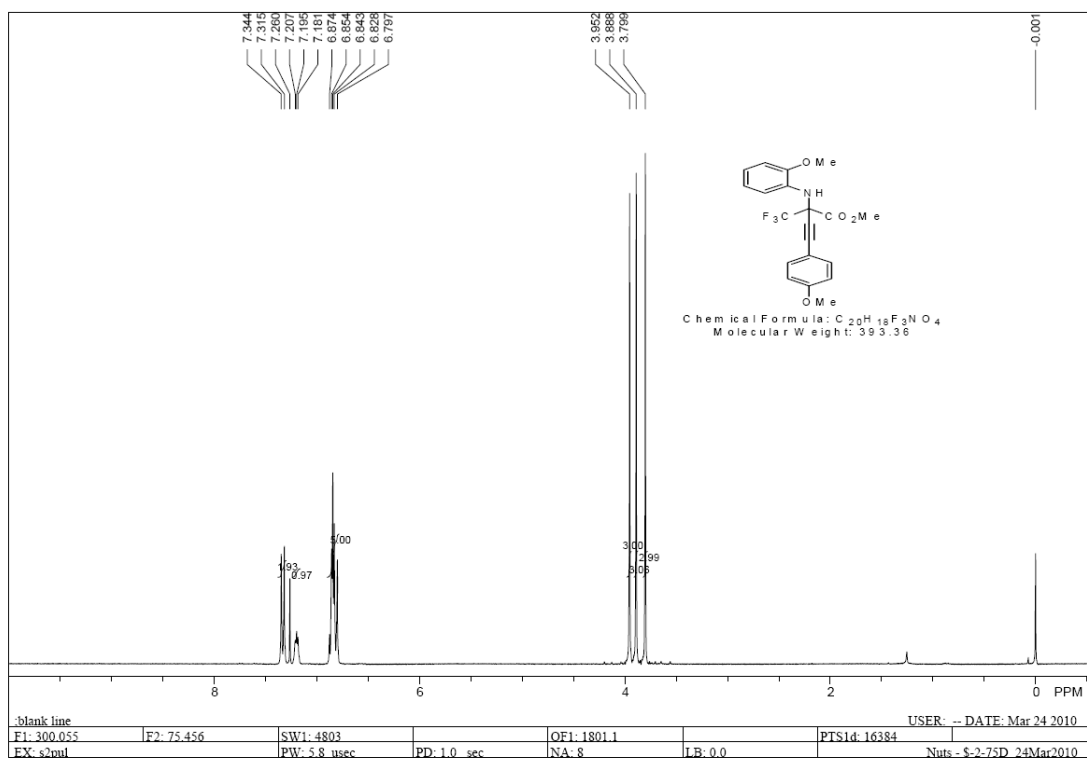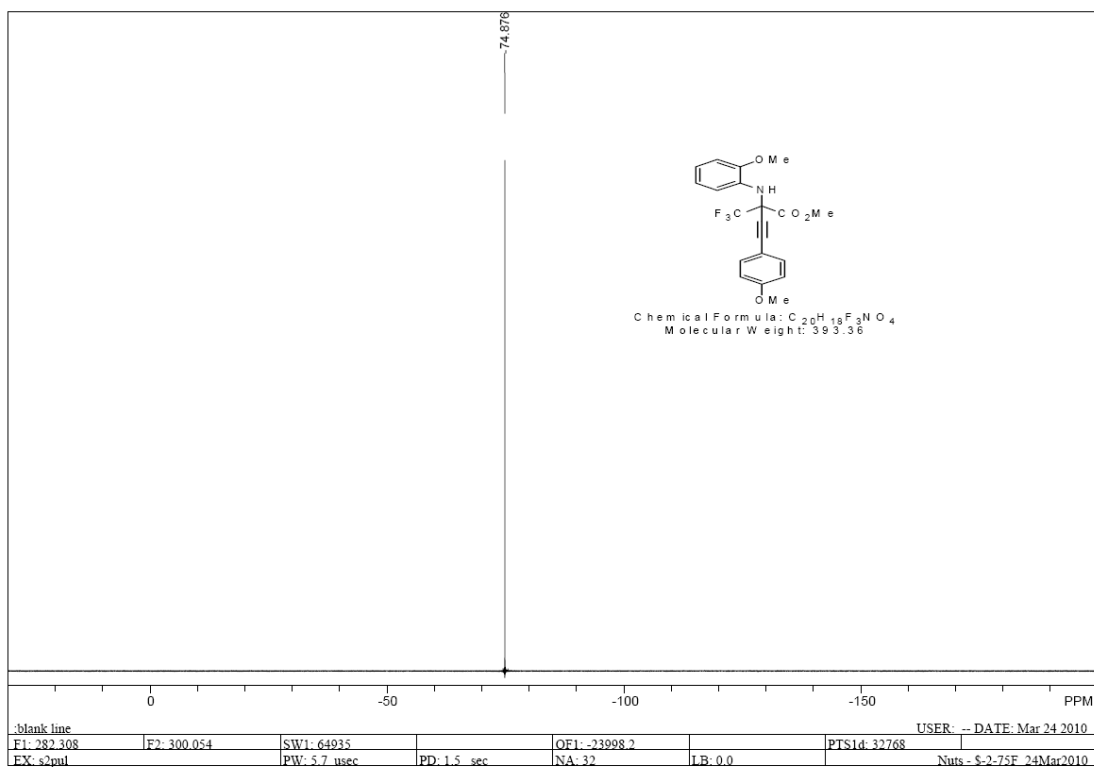

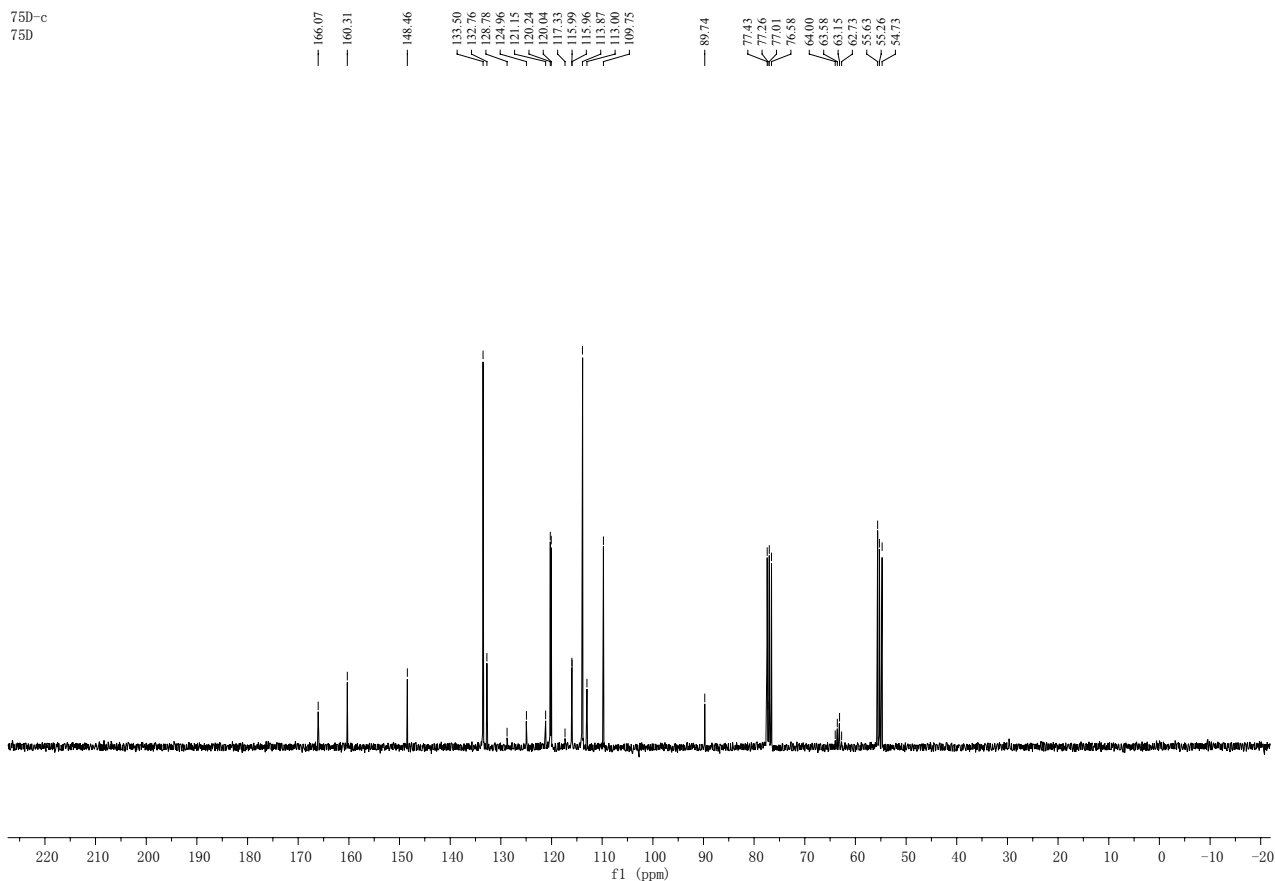

## Chiral HPLC Analysis of 3c

### HPLC Report

Sample Name:

Data File:HGC-2-46+-.che

Operator:

Date:2010-12-20

Time:14:11

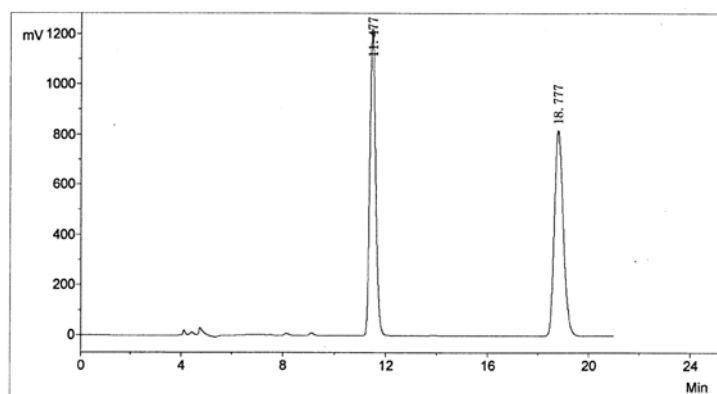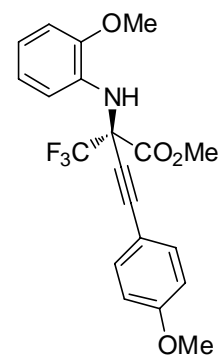

| No.   | PeakNo | ID. Name | R. Time | PeakHeight | PeakArea   | PerCent  |
|-------|--------|----------|---------|------------|------------|----------|
| 1     | 1      |          | 11.477  | 1221342.7  | 19313416.8 | 49.1120  |
| 2     | 2      |          | 18.777  | 817490.0   | 20011867.6 | 50.8880  |
| Total |        |          |         | 2038832.7  | 39325284.4 | 100.0000 |

## HPLC Report

Sample Name:

Data File:HGC-4-60Q.che

Operator:

Date:2010-12-20

Time:14:55

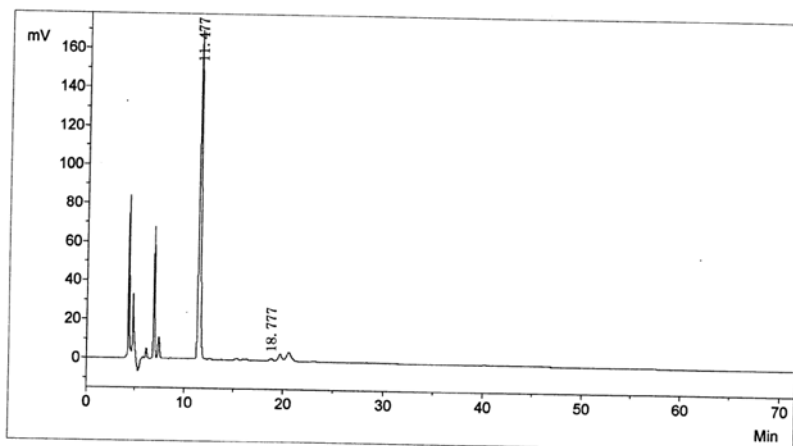

| No.   | PeakNo | ID. Name | R. Time | PeakHeight | PeakArea  | PerCent  |
|-------|--------|----------|---------|------------|-----------|----------|
| 1     | 1      |          | 11.477  | 169505.4   | 2512961.3 | 99.2637  |
| 2     | 2      |          | 18.777  | 903.9      | 18640.0   | 0.7363   |
| Total |        |          |         | 170409.3   | 2531601.3 | 100.0000 |

before column chromatography

## HPLC Report

Sample Name:

Data File:HGC-4-60T.che

Operator:

Date:2010-12-20

Time:14:33

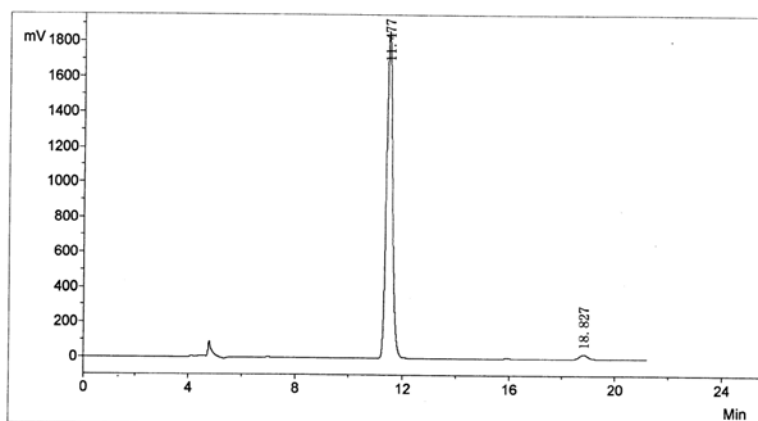

| No.   | PeakNo | ID. Name | R. Time | PeakHeight | PeakArea   | PerCent  |
|-------|--------|----------|---------|------------|------------|----------|
| 1     | 1      |          | 11.477  | 1847562.1  | 29685239.7 | 97.9500  |
| 2     | 2      |          | 18.827  | 26661.9    | 621286.0   | 2.0500   |
| Total |        |          |         | 1874224.0  | 30306525.7 | 100.0000 |

after column chromatography

**(R)-Methyl 4-(6-methoxynaphthalen-2-yl)-2-(2-methoxyphenylamino)-2-(trifluoromethyl)but-3-ynoate (3d).**

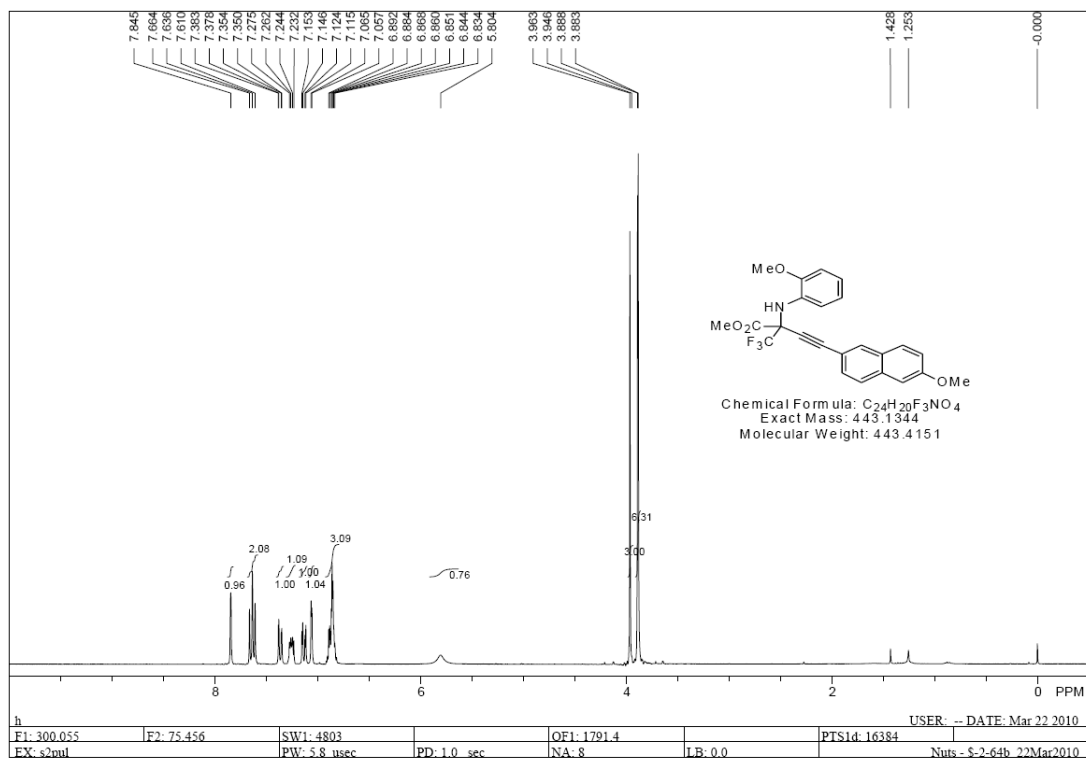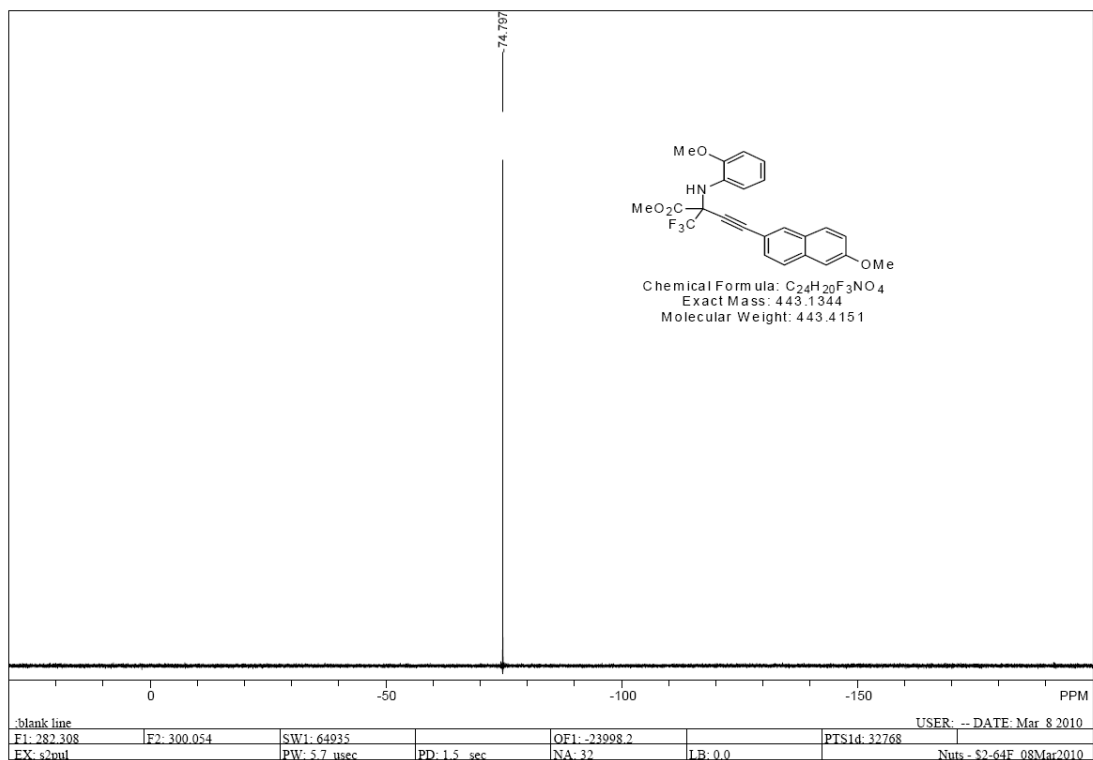

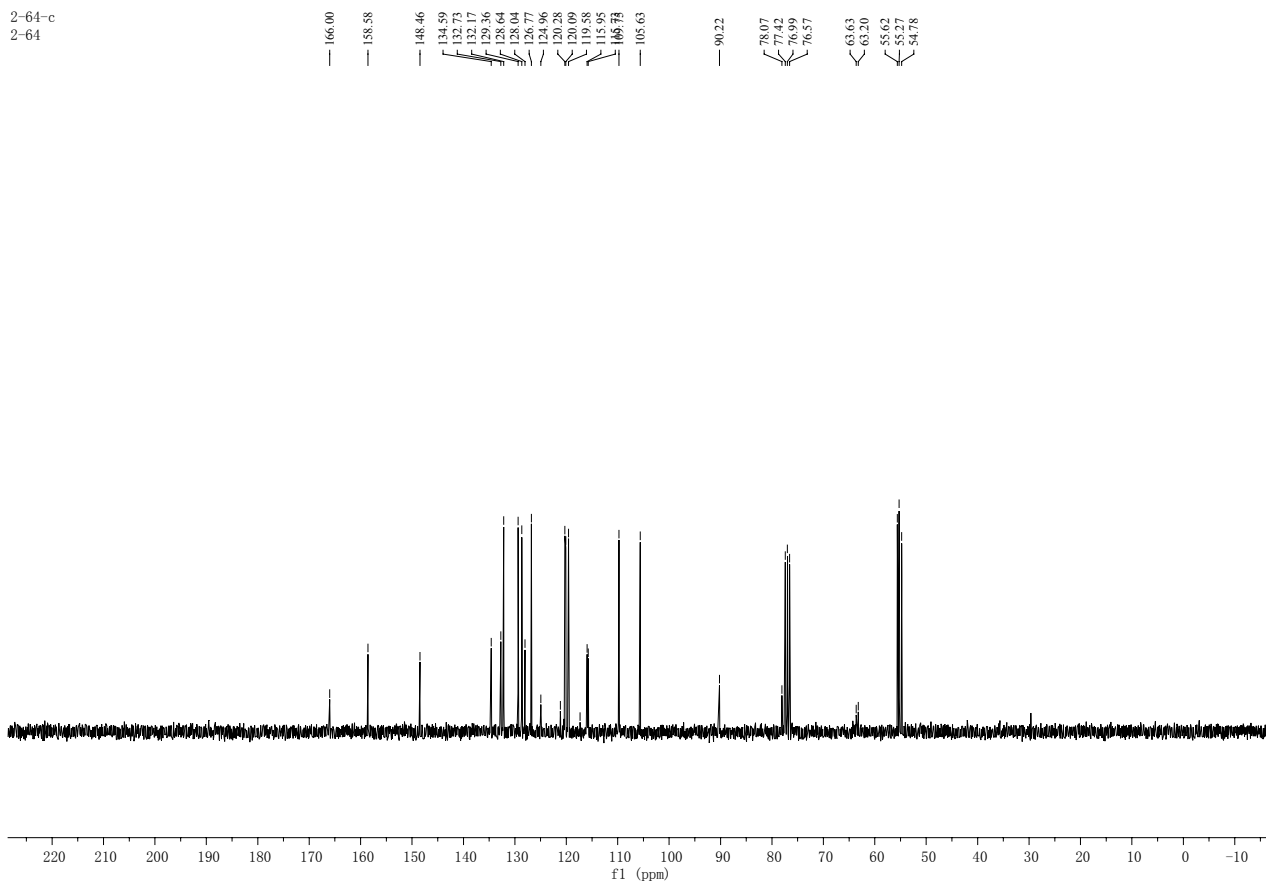

## Chiral HPLC Analysis of 3d

### HPLC Report

Sample Name:

Data File: HGC-2-53+- AD-H 982 214 0.7. che

Operator:

Date: 2010-12-21

Time: 14:51

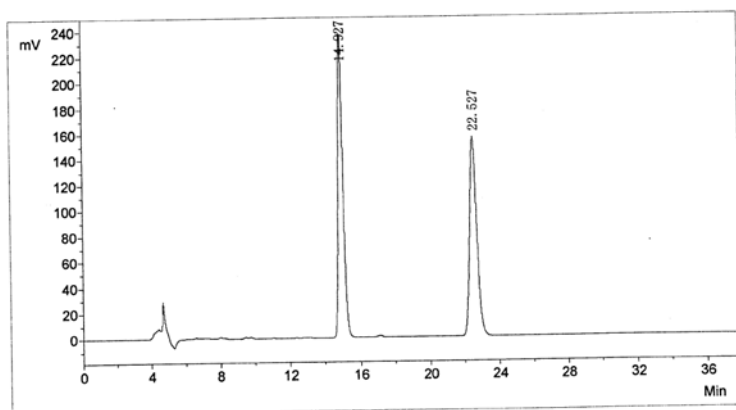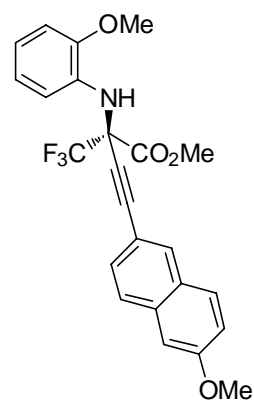

| No.   | PeakNo | ID. Name | R. Time | PeakHeight | PeakArea  | PerCent  |
|-------|--------|----------|---------|------------|-----------|----------|
| 1     | 1      |          | 14.927  | 237659.7   | 4570249.3 | 50.6358  |
| 2     | 2      |          | 22.527  | 155344.4   | 4455475.5 | 49.3642  |
| Total |        |          |         | 393004.1   | 9025724.8 | 100.0000 |

## HPLC Report

Sample Name: Data File:HGC-4-61Q. che  
Operator: Date:2010-12-21  
Time:16:28

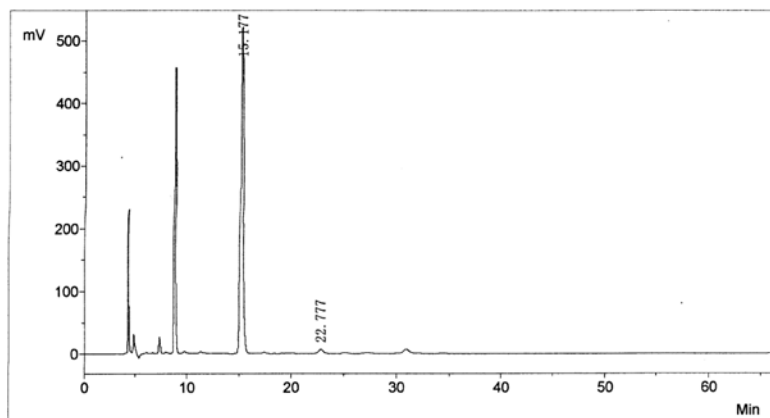

| No.   | PeakNo | ID. Name | R. Time | PeakHeight | PeakArea  | PerCent  |
|-------|--------|----------|---------|------------|-----------|----------|
| 1     | 1      |          | 15.177  | 521123.2   | 9702739.9 | 97.9889  |
| 2     | 2      |          | 22.777  | 6955.2     | 199135.6  | 2.0111   |
| Total |        |          |         | 528078.5   | 9901875.5 | 100.0000 |

before column chromatography

## HPLC Report

Sample Name: Data File:HGC-4-61T. che  
Operator: Date:2010-12-21  
Time:15:36

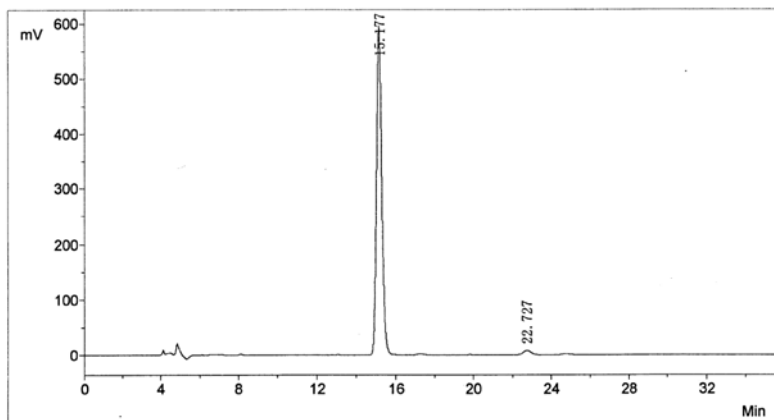

| No.   | PeakNo | ID. Name | R. Time | PeakHeight | PeakArea   | PerCent  |
|-------|--------|----------|---------|------------|------------|----------|
| 1     | 1      |          | 15.177  | 586368.6   | 11126921.8 | 97.9114  |
| 2     | 2      |          | 22.727  | 8401.4     | 237349.0   | 2.0886   |
| Total |        |          |         | 594770.0   | 11364270.8 | 100.0000 |

after column chromatography

**(R)-Methyl 4-(3-chlorophenyl)-2-(2-methoxyphenylamino)-2-(trifluoromethyl)but-3-ynoate (3e) .**

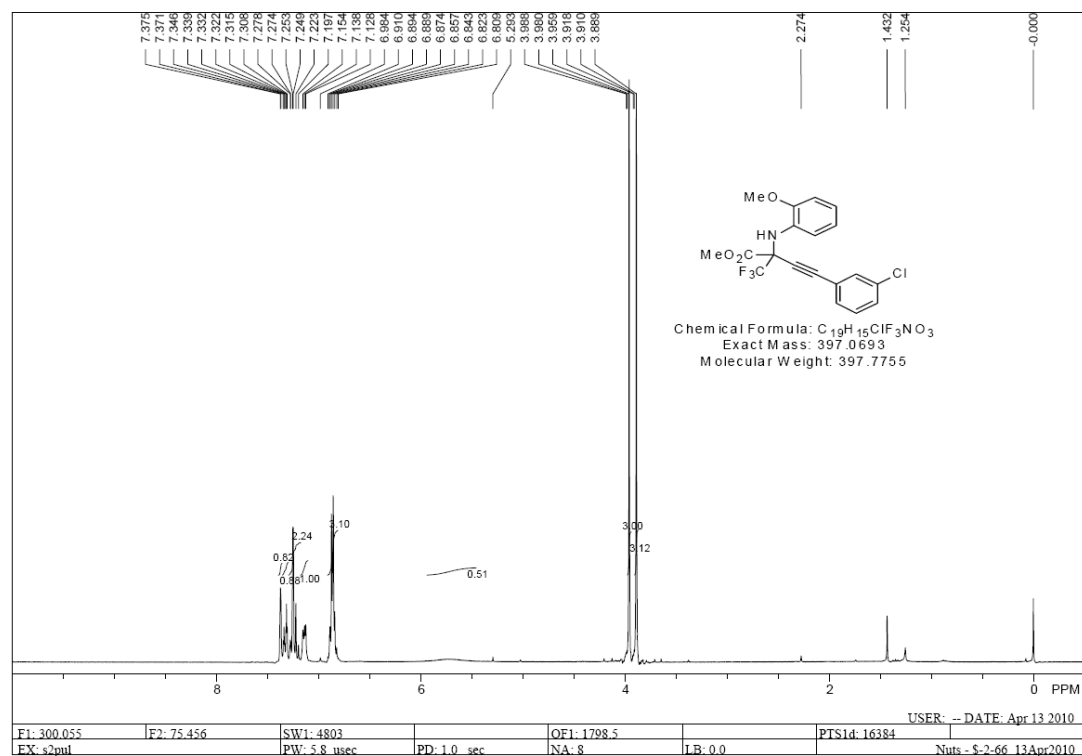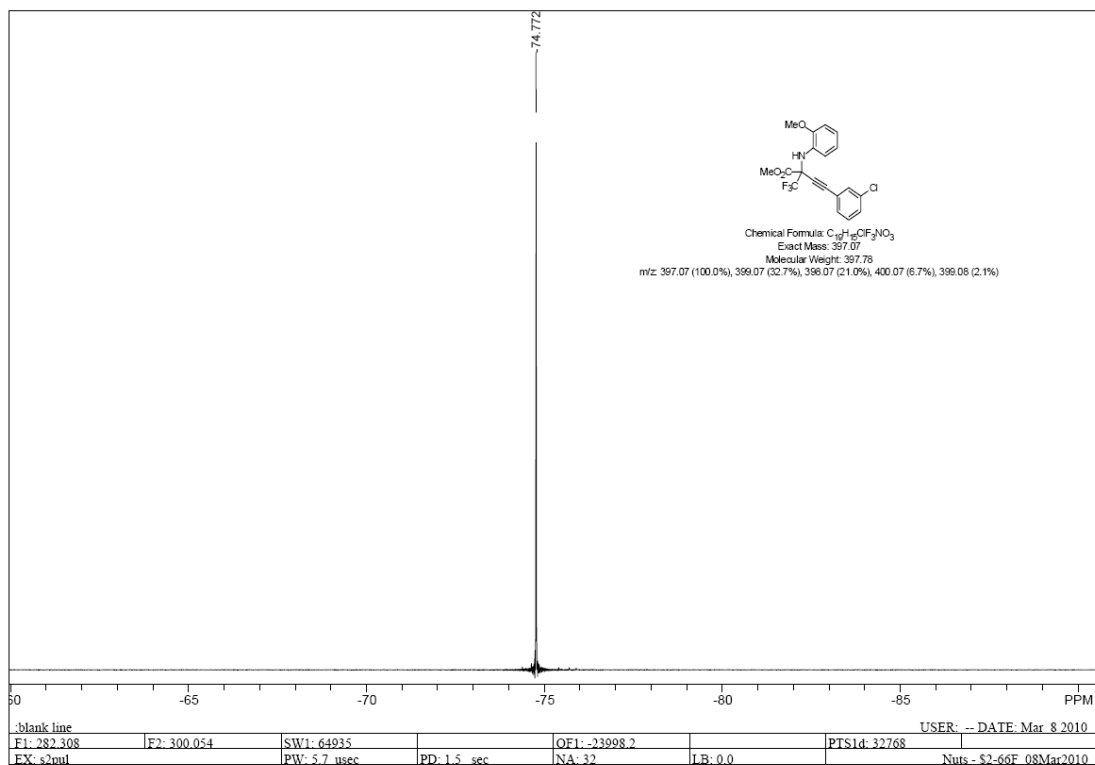

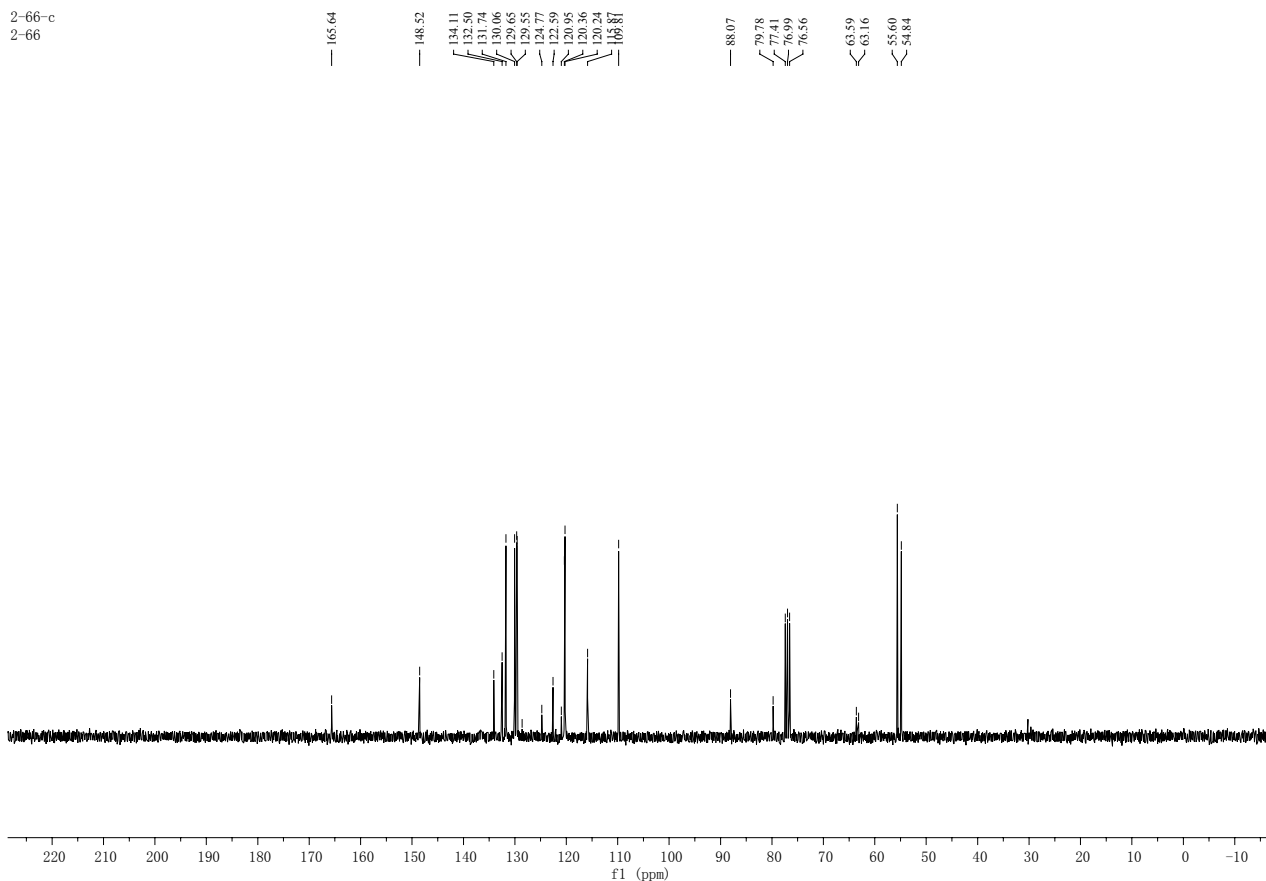

## Chiral HPLC Analysis of 3e

### HPLC Report

Sample Name: Data File:HGC-2-44+-...che  
Operator: Date:2010-12-28  
Time:07:29

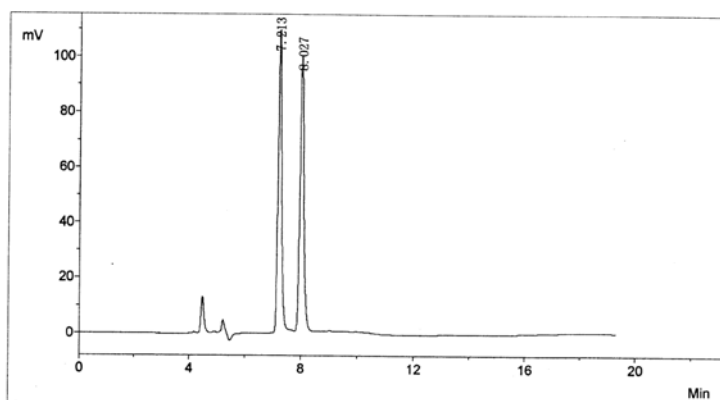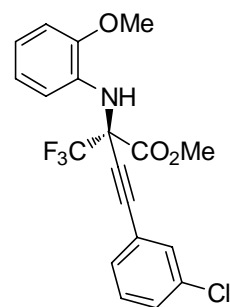

| No.   | PeakNo | ID. Name | R. Time | PeakHeight | PeakArea  | PerCent  |
|-------|--------|----------|---------|------------|-----------|----------|
| 1     | 1      |          | 7.213   | 108698.4   | 940799.7  | 49.6798  |
| 2     | 2      |          | 8.027   | 91980.2    | 952928.3  | 50.3202  |
| Total |        |          |         | 200678.6   | 1893727.9 | 100.0000 |



## HPLC Report

Sample Name:

Data File:HGC-4-69CZQ. che

Operator:

Date:2010-12-28

Time:08:28

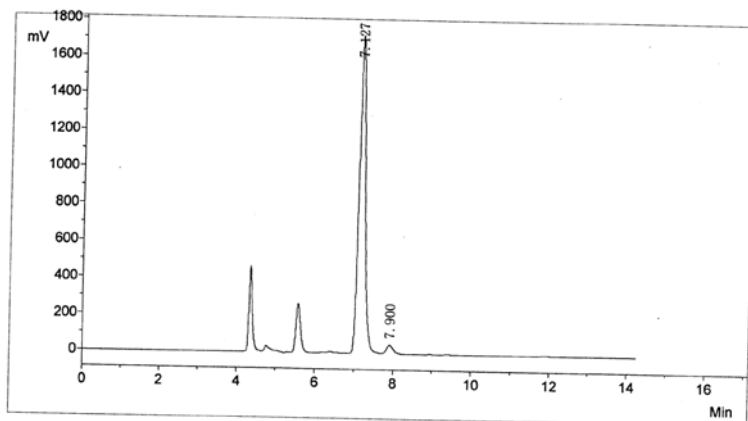

| No.   | PeakNo | ID. Name | R. Time | PeakHeight | PeakArea   | PerCent  |
|-------|--------|----------|---------|------------|------------|----------|
| 1     | 1      |          | 7.127   | 1711607.7  | 19317804.1 | 97.3195  |
| 2     | 2      |          | 7.900   | 46587.7    | 532074.5   | 2.6805   |
| Total |        |          |         | 1758195.4  | 19849878.6 | 100.0000 |

before column chromatography

## HPLC Report

Sample Name:

Data File:HGC-4-69CZT...che

Operator:

Date:2010-12-28

Time:08:11

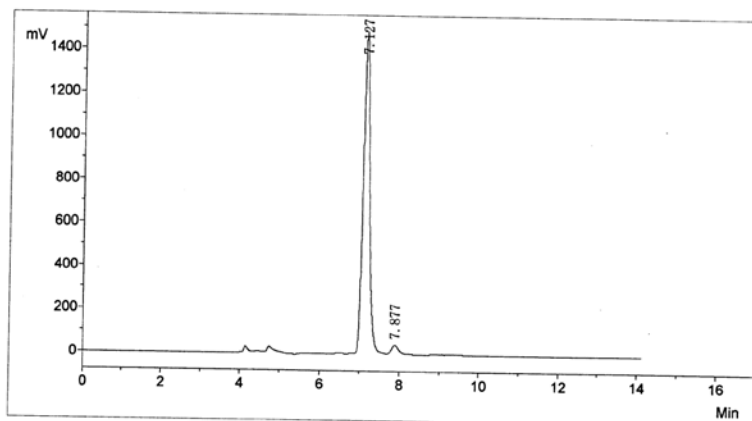

| No.   | PeakNo | ID. Name | R. Time | PeakHeight | PeakArea   | PerCent  |
|-------|--------|----------|---------|------------|------------|----------|
| 1     | 1      |          | 7.127   | 1458045.9  | 16957288.1 | 96.9474  |
| 2     | 2      |          | 7.877   | 41963.7    | 533935.3   | 3.0526   |
| Total |        |          |         | 1500009.7  | 17491223.3 | 100.0000 |

after column chromatography

**(R)-Ethyl 4-(4,4,4-trifluoro-3-(methoxycarbonyl)-3-(2-methoxyphenylamino)but-1-ynyl)benzoate (3f).**

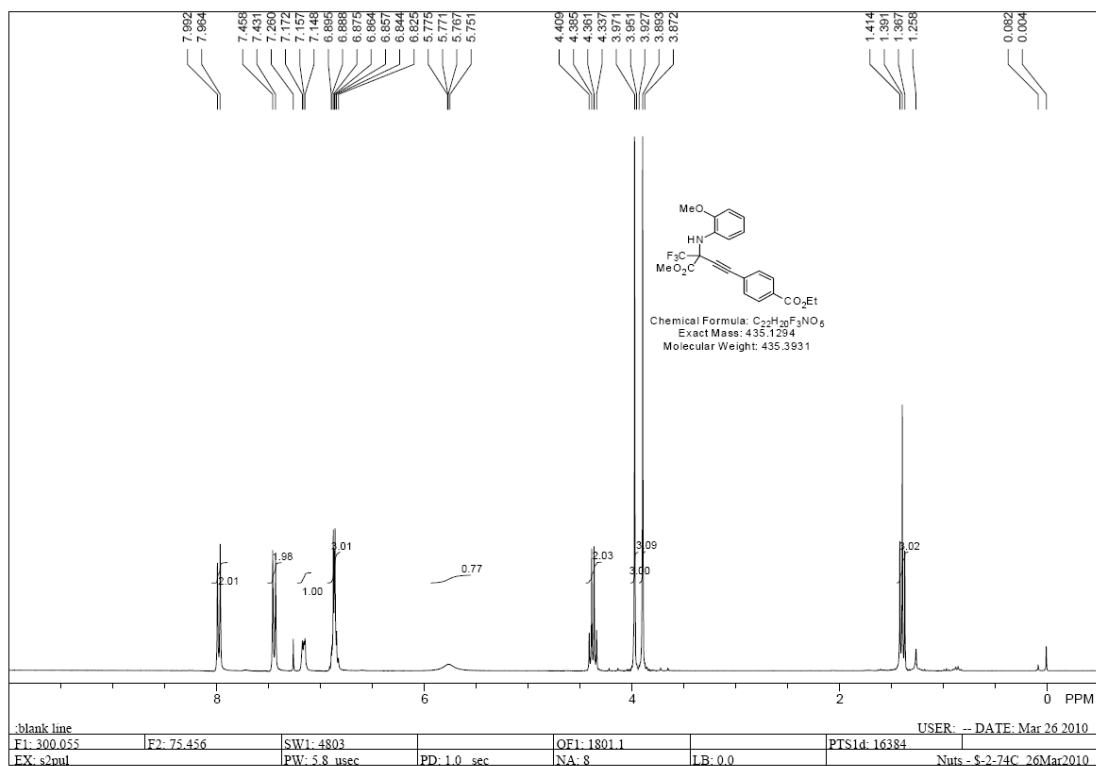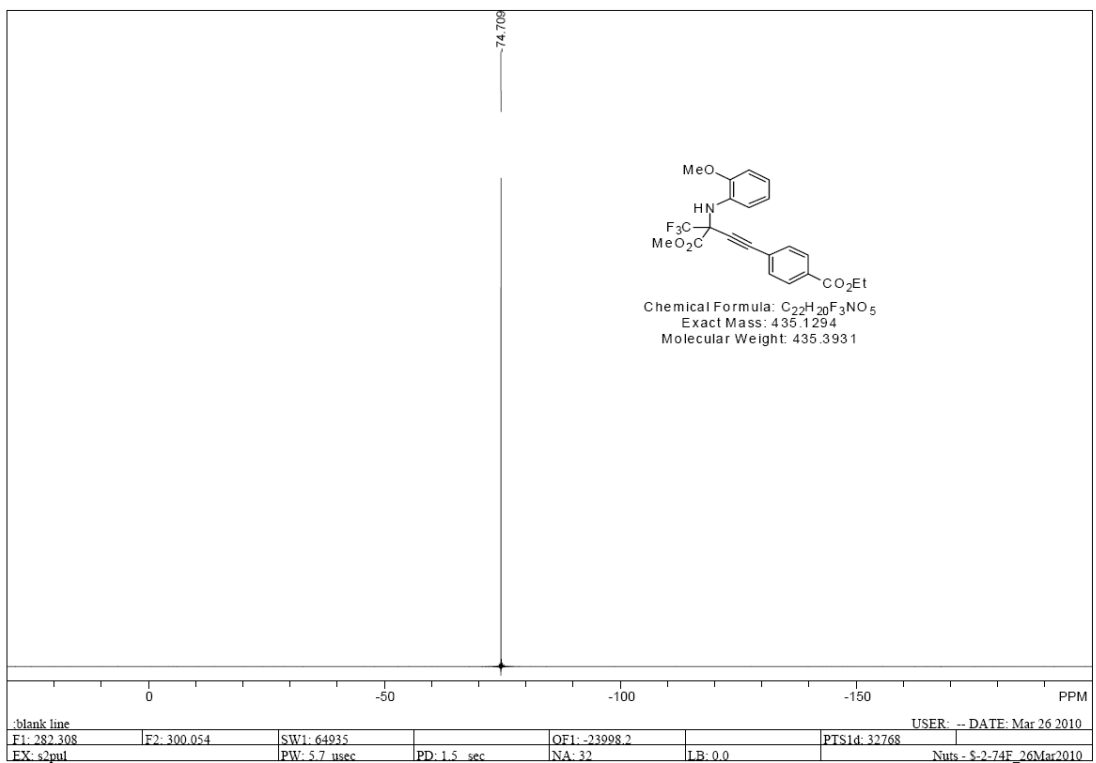

2-74-c  
2-74

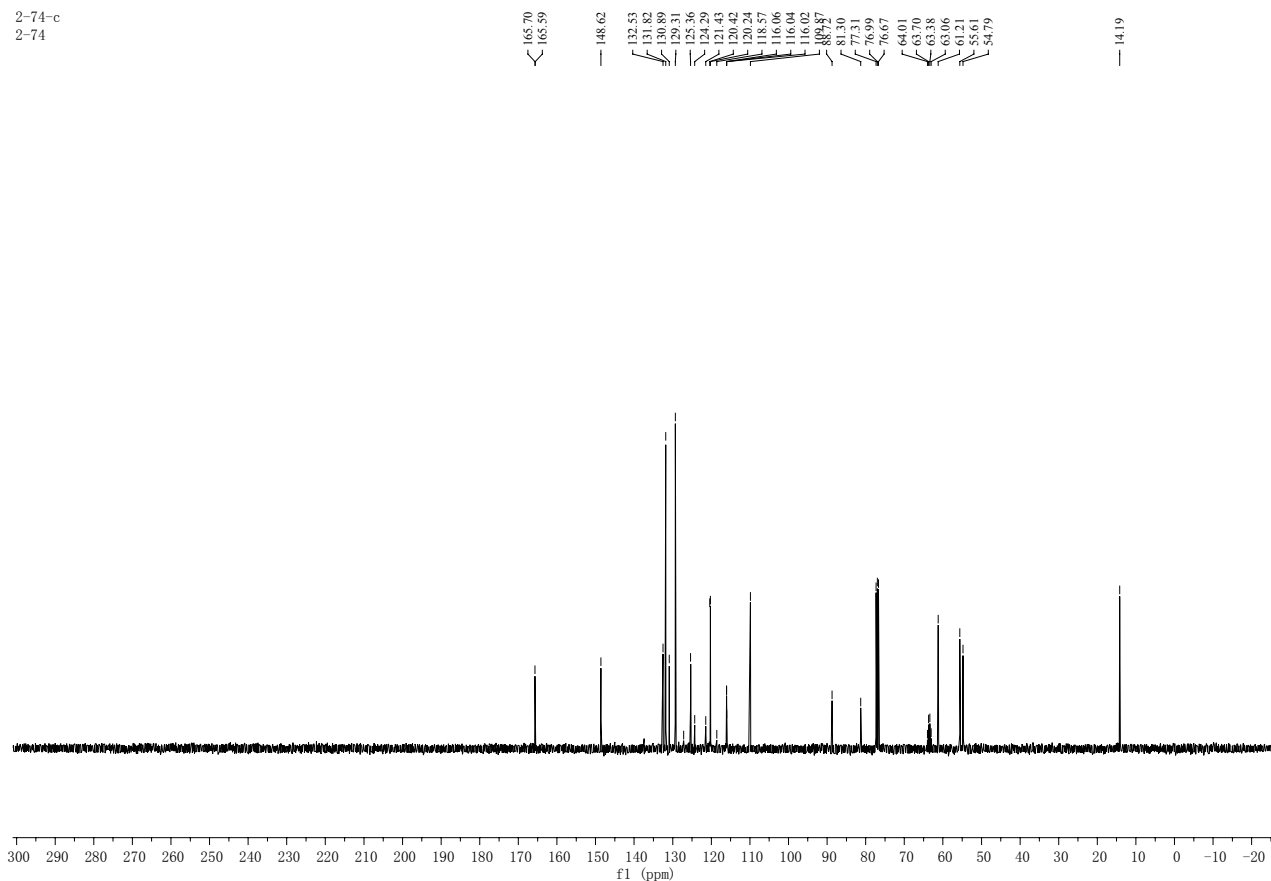

## Chiral HPLC Analysis of 3f

### HPLC Report

Sample Name:

Data File:HGC-2-88+-...che

Operator:

Date:2010-12-27

Time:08:03

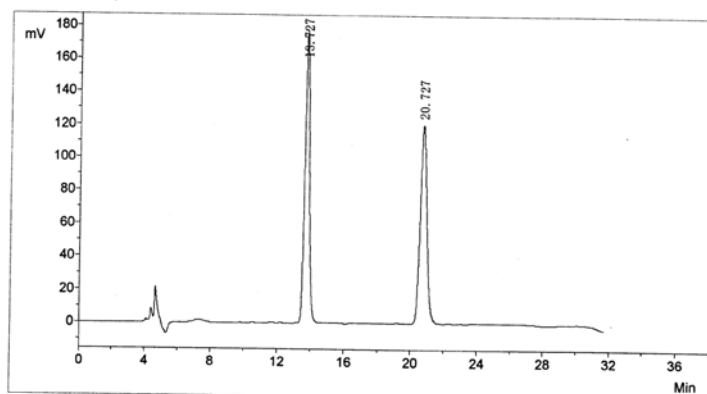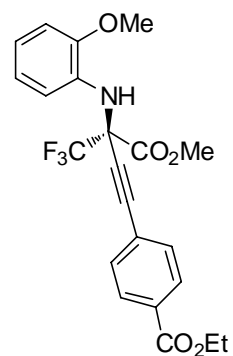

| No.   | PeakNo | ID. Name | R. Time | PeakHeight | PeakArea  | PerCent  |
|-------|--------|----------|---------|------------|-----------|----------|
| 1     | 1      |          | 13.727  | 175173.3   | 3370476.7 | 50.4665  |
| 2     | 2      |          | 20.727  | 119999.2   | 3308170.4 | 49.5335  |
| Total |        |          |         | 295172.4   | 6678647.1 | 100.0000 |

## HPLC Report

Sample Name:

Data File:HGC-4-672Q.che

Operator:

Date:2010-12-27

Time:09:58

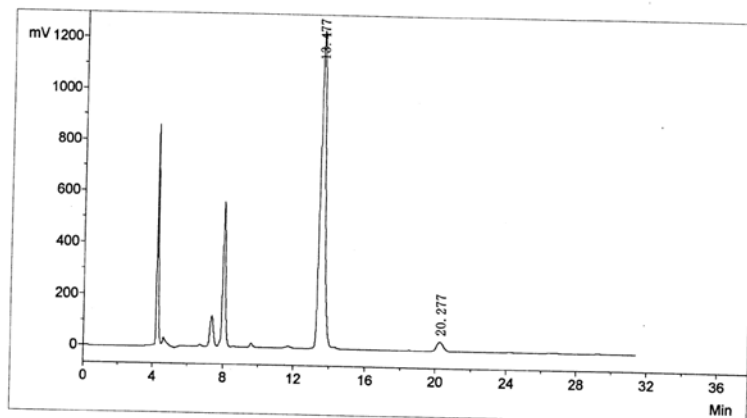

| No.   | PeakNo | ID. Name | R. Time | PeakHeight | PeakArea   | PerCent  |
|-------|--------|----------|---------|------------|------------|----------|
| 1     | 1      |          | 13.477  | 1233370.2  | 24535852.6 | 95.9312  |
| 2     | 2      |          | 20.277  | 37327.2    | 1040656.7  | 4.0688   |
| Total |        |          |         | 1270697.4  | 25576509.4 | 100.0000 |

before column chromatography

## HPLC Report

Sample Name:

Data File:HGC-4-672T.che

Operator:

Date:2010-12-27

Time:08:37

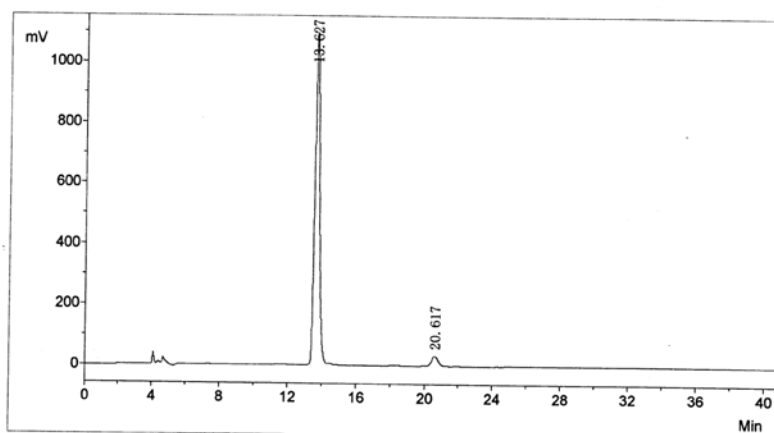

| No.   | PeakNo | ID. Name | R. Time | PeakHeight | PeakArea   | PerCent  |
|-------|--------|----------|---------|------------|------------|----------|
| 1     | 1      |          | 13.627  | 1089395.0  | 21087603.4 | 95.9291  |
| 2     | 2      |          | 20.617  | 33398.6    | 894878.5   | 4.0709   |
| Total |        |          |         | 1122793.6  | 21982481.9 | 100.0000 |

after column chromatography

**(R)-Methyl 4-cyclohexenyl-2-(2-methoxyphenylamino)-2-(trifluoromethyl)but-3-ynoate (3g).**

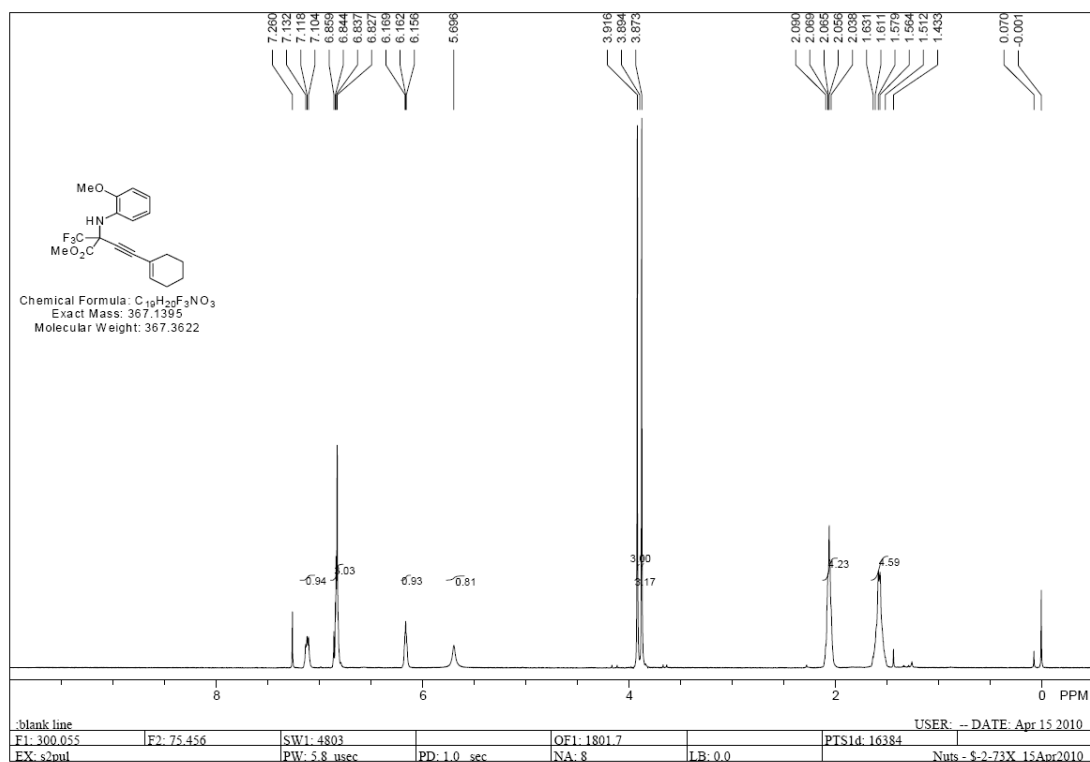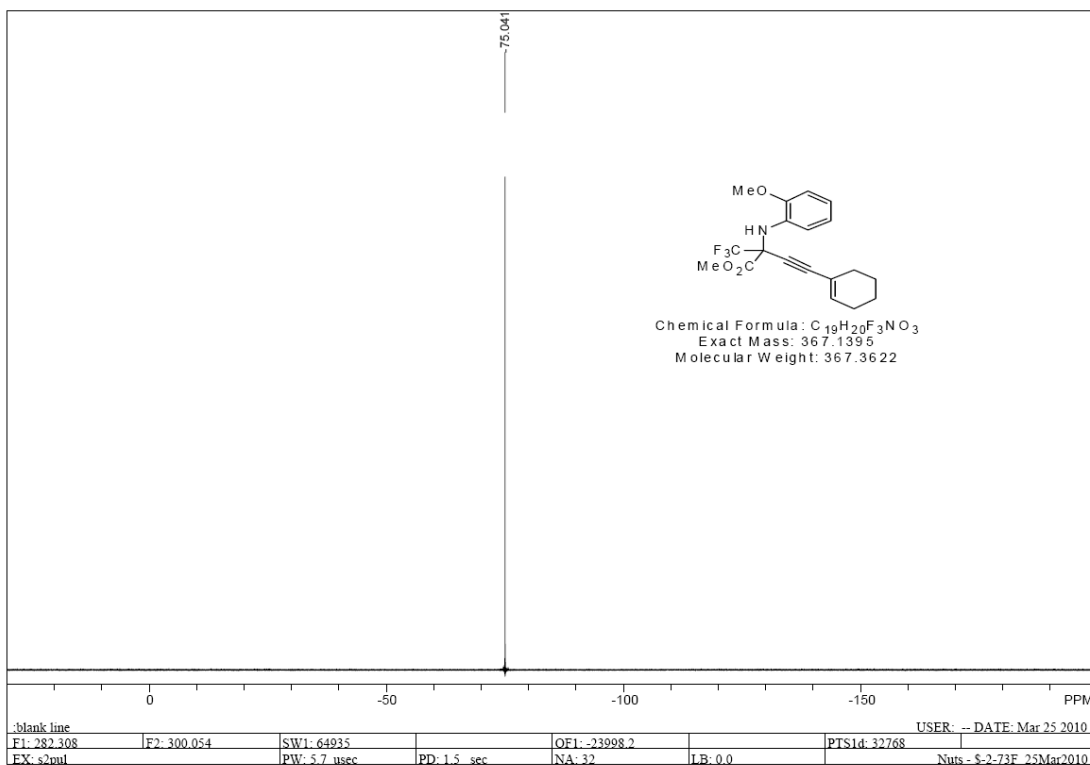

2-73-c  
2-73

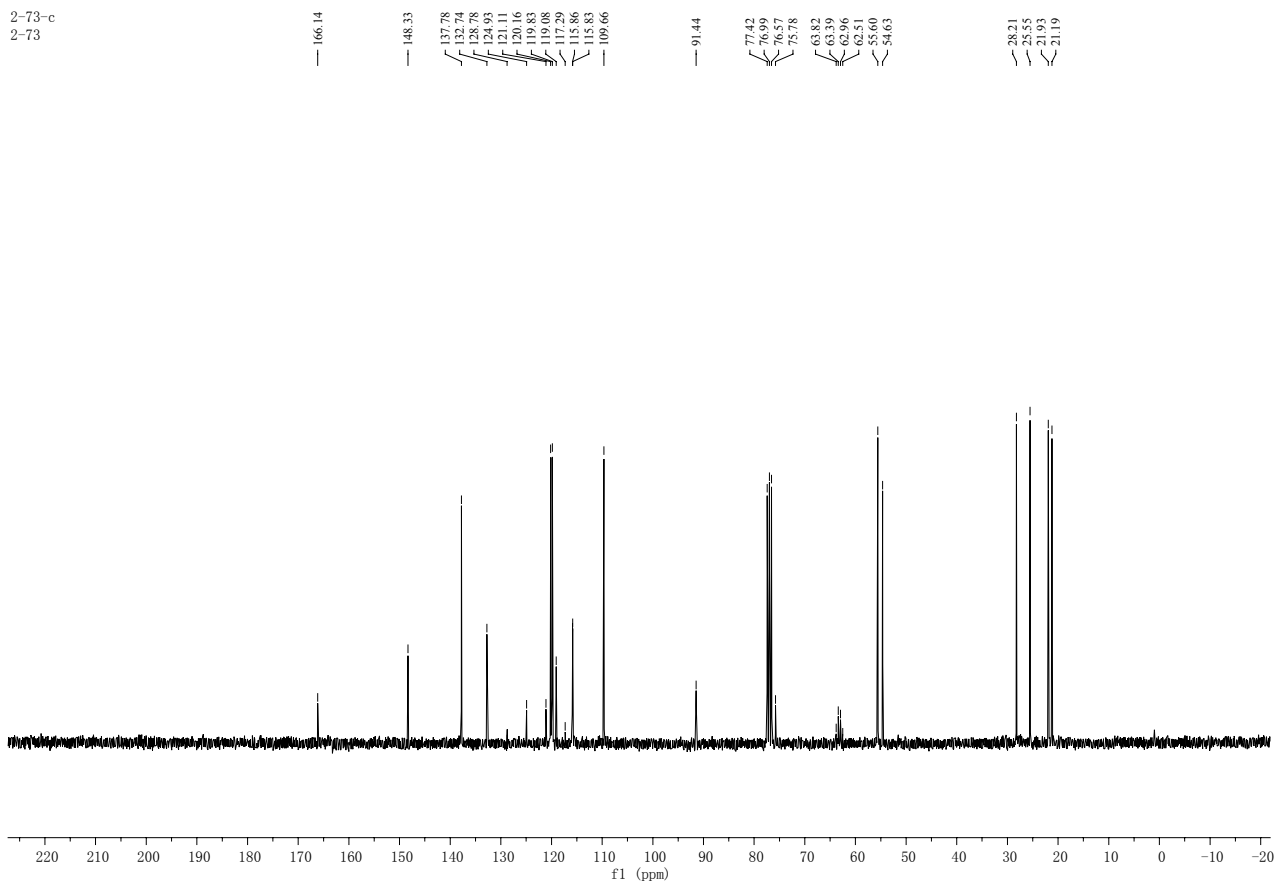

### Chiral HPLC Analysis of 3g

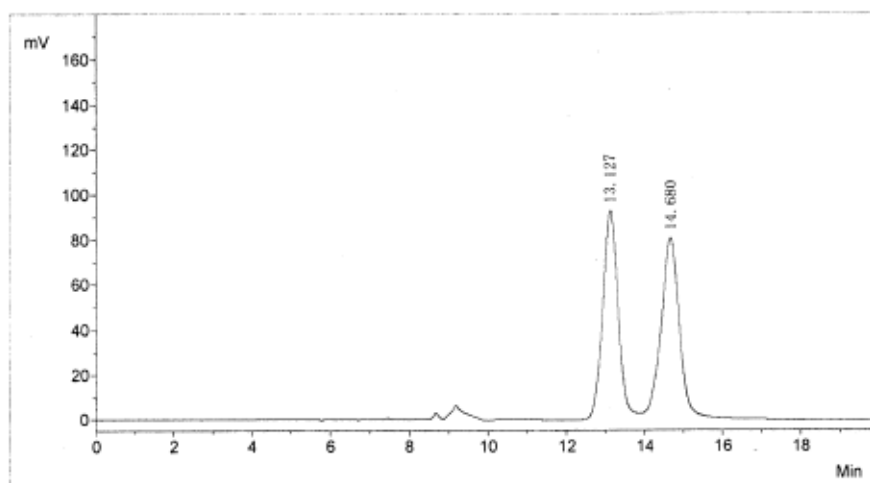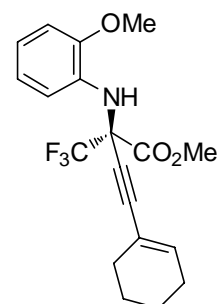

| No.   | PeakNo | R. Time | PeakHeight | PeakArea  | PerCent  |
|-------|--------|---------|------------|-----------|----------|
| 1     | 1      | 13.127  | 91116.6    | 2415291.8 | 49.6979  |
| 2     | 2      | 14.680  | 78558.0    | 2444656.2 | 50.3021  |
| Total |        |         | 169674.7   | 4859947.9 | 100.0000 |

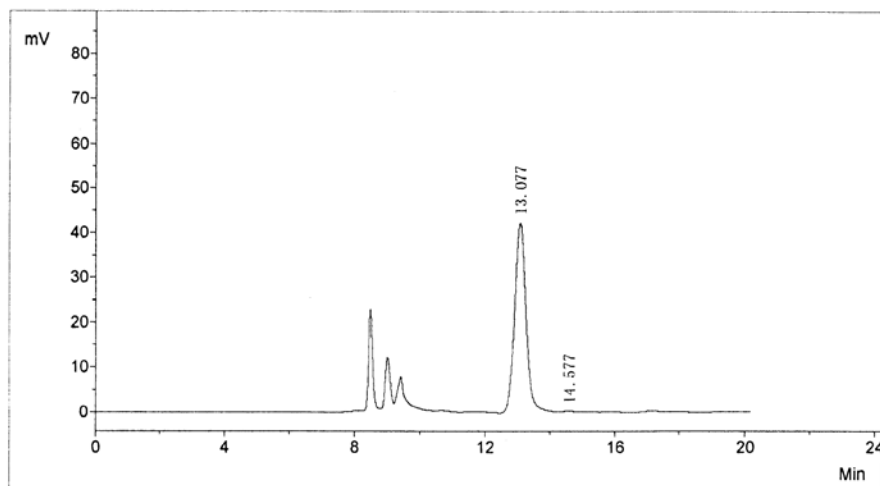

| No.   | PeakNo | R. Time | PeakHeight | PeakArea  | PerCent  |
|-------|--------|---------|------------|-----------|----------|
| 1     | 1      | 13.077  | 42466.9    | 1031002.0 | 99.7685  |
| 2     | 2      | 14.577  | 111.1      | 2391.9    | 0.2315   |
| Total |        |         | 42578.0    | 1033393.9 | 100.0000 |

before column chromatography

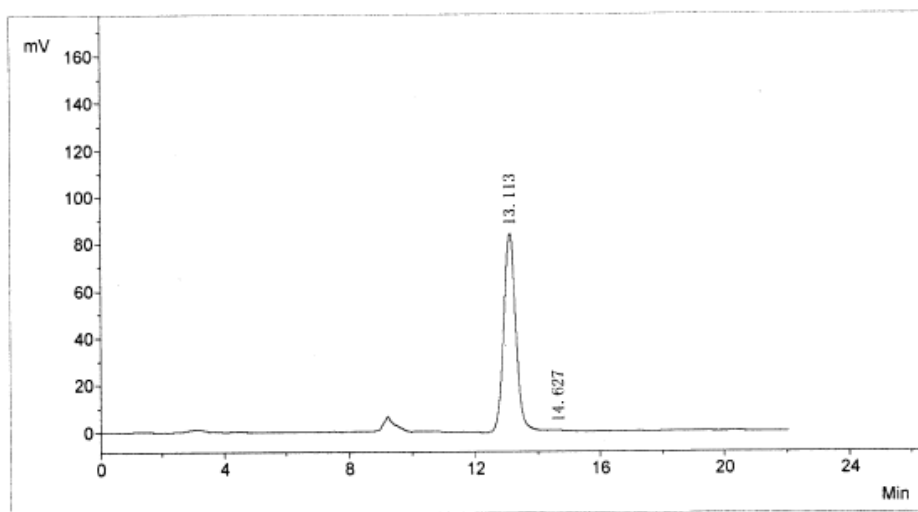

| No.   | PeakNo | R. Time | PeakHeight | PeakArea  | PerCent  |
|-------|--------|---------|------------|-----------|----------|
| 1     | 1      | 13.113  | 84195.9    | 2235363.3 | 99.7858  |
| 2     | 2      | 14.627  | 235.0      | 4798.2    | 0.2142   |
| Total |        |         | 84430.9    | 2240161.5 | 100.0000 |

after column chromatography

**(R)-Methyl 4-cyclopropyl-2-(2-methoxyphenylamino)-2-(trifluoromethyl)but-3-ynoate (3h).**

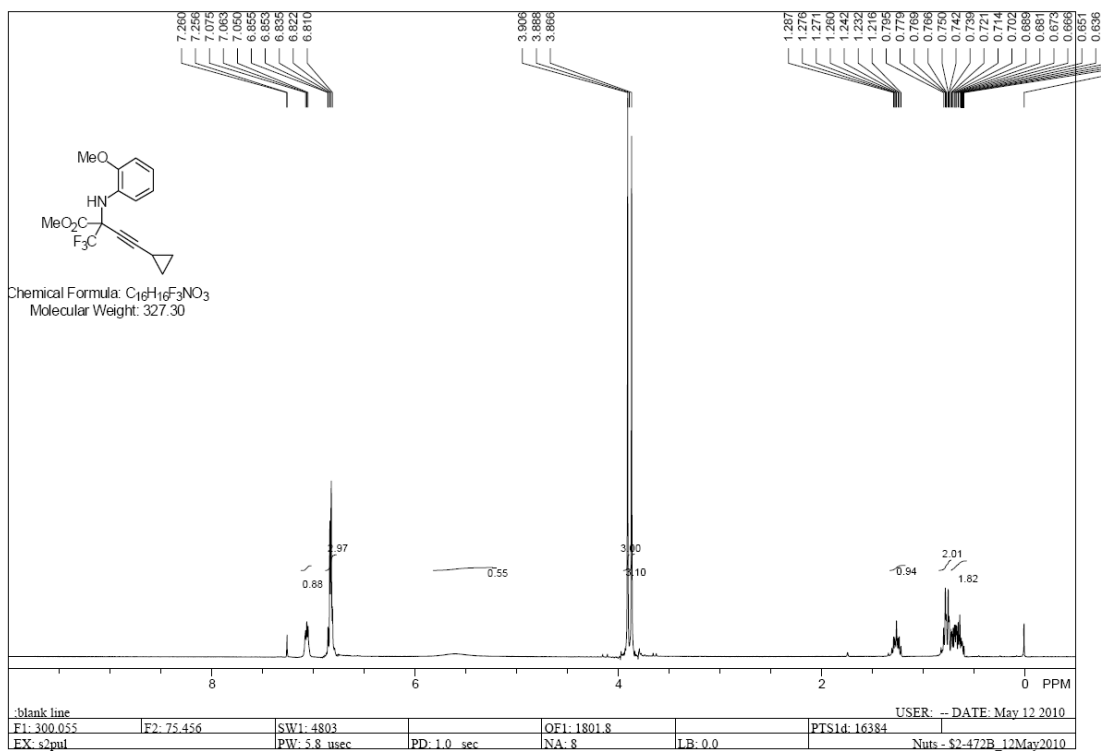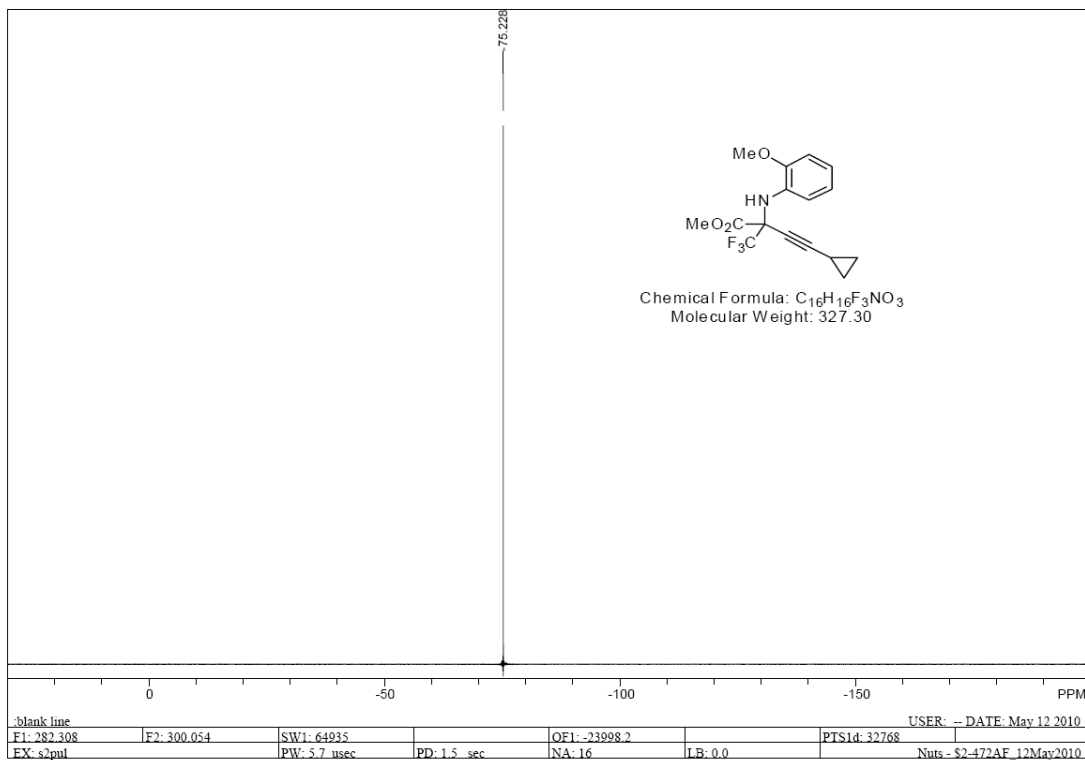



472B-C  
wdw-6-40-10e13

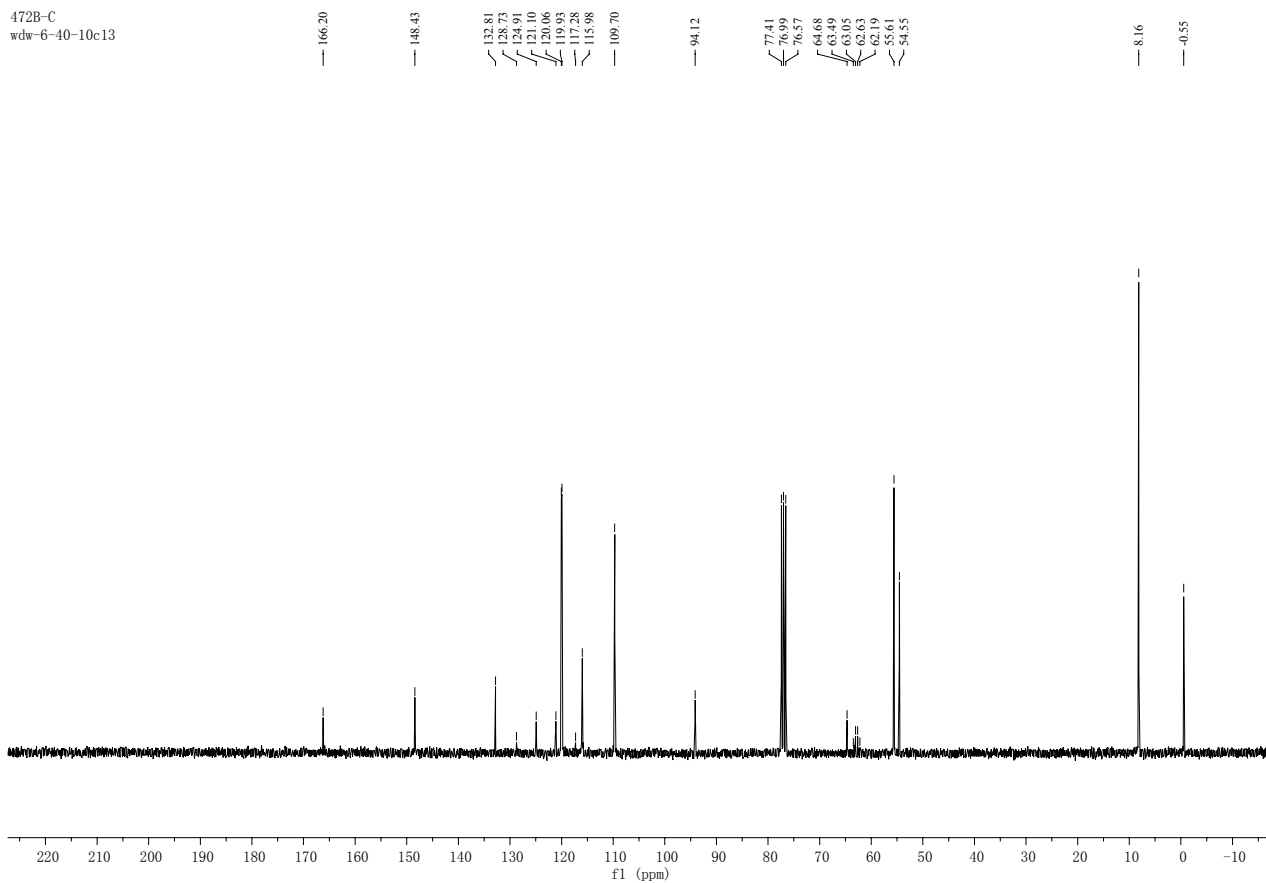

### Chiral HPLC Analysis of 3h

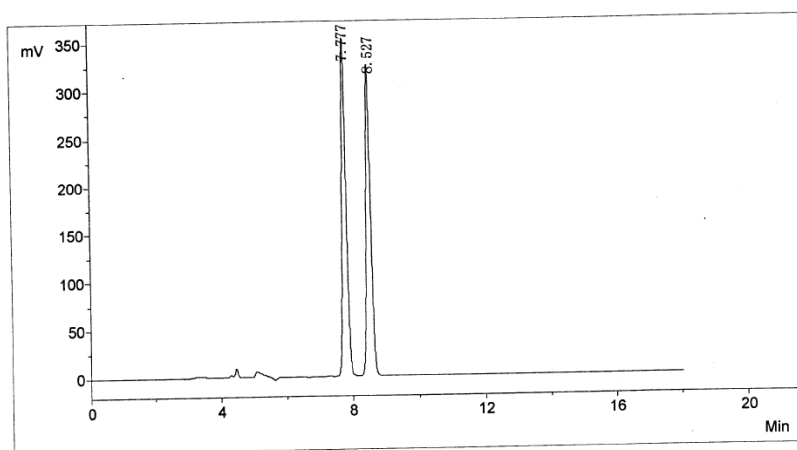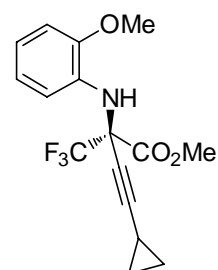

| No.   | PeakNo | ID. Name | R. Time | PeakHeight | PeakArea  | PerCent  |
|-------|--------|----------|---------|------------|-----------|----------|
| 1     | 1      |          | 7.777   | 353140.5   | 3165398.1 | 49.8019  |
| 2     | 2      |          | 8.527   | 308758.6   | 3190581.7 | 50.1981  |
| Total |        |          |         | 661899.2   | 6355979.8 | 100.0000 |

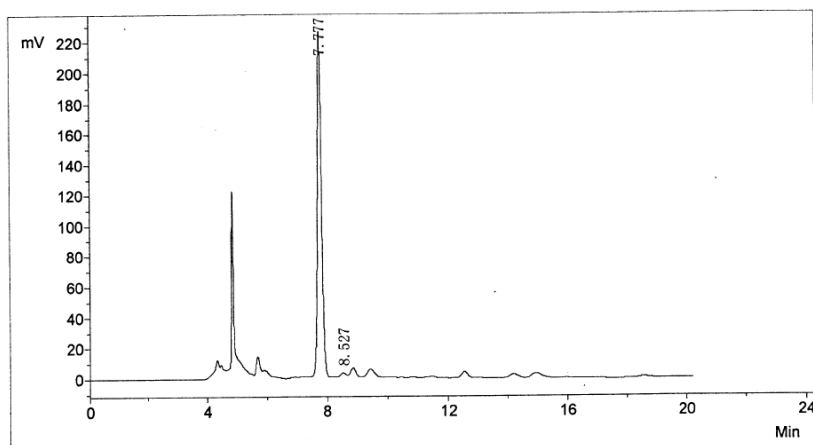

| No.   | PeakNo | ID. Name | R. Time | PeakHeight | PeakArea  | PerCent  |
|-------|--------|----------|---------|------------|-----------|----------|
| 1     | 1      |          | 7.777   | 216594.8   | 2147230.1 | 99.2313  |
| 2     | 2      |          | 8.527   | 1888.5     | 16632.8   | 0.7687   |
| Total |        |          |         | 218483.3   | 2163862.8 | 100.0000 |

before column chromatography

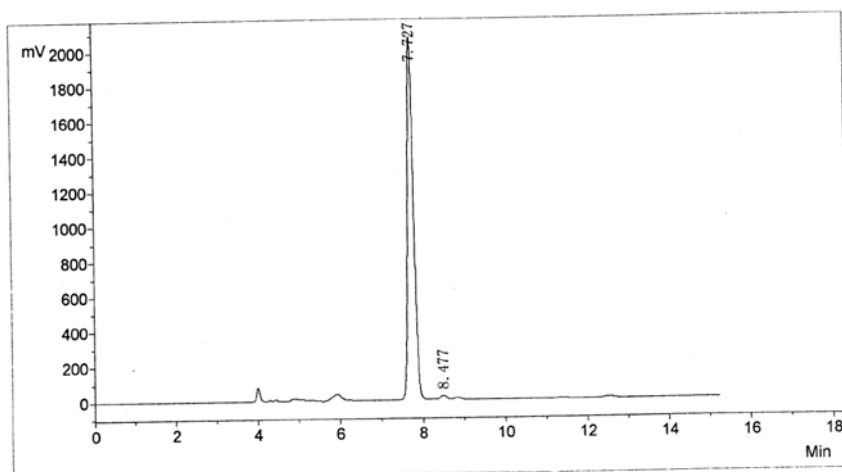

| No.   | PeakNo | ID. Name | R. Time | PeakHeight | PeakArea   | PerCent  |
|-------|--------|----------|---------|------------|------------|----------|
| 1     | 1      |          | 7.727   | 2009651.4  | 21004026.3 | 99.1001  |
| 2     | 2      |          | 8.477   | 19180.2    | 190726.3   | 0.8999   |
| Total |        |          |         | 2028831.6  | 21194752.5 | 100.0000 |

after column chromatography

**(R)-Methyl 2-(2-methoxyphenylamino)-5,5-dimethyl-2-(trifluoromethyl)hex-3-ynoate (3i).**

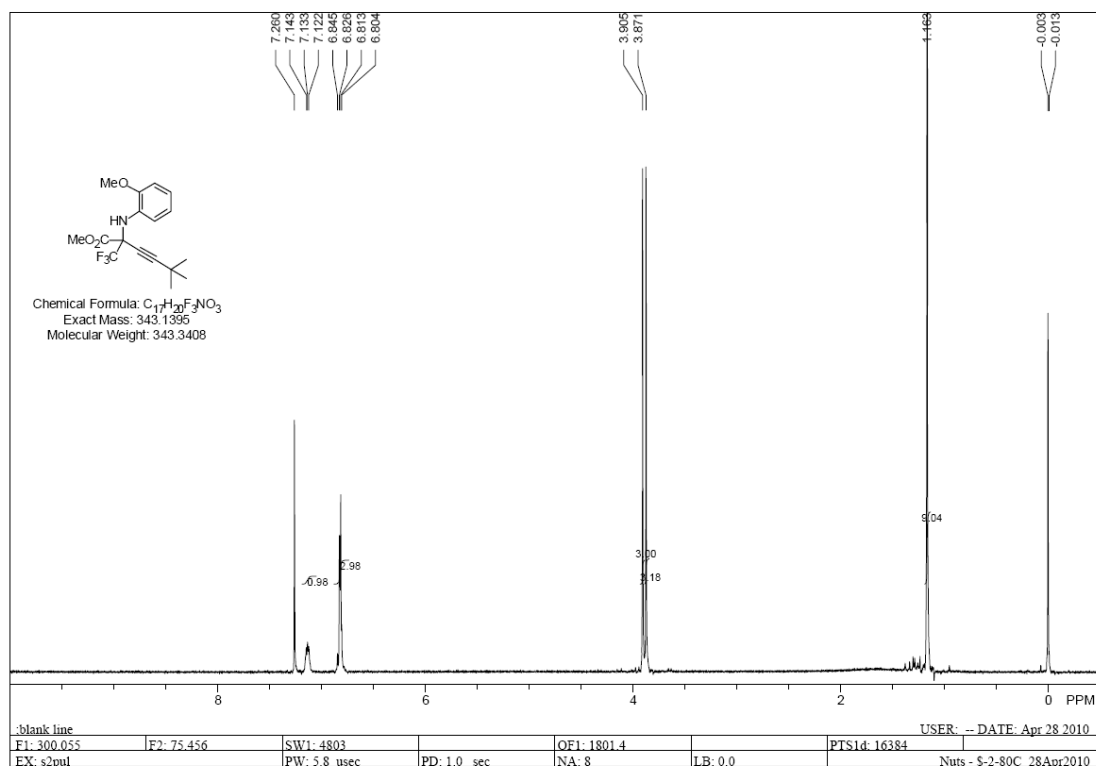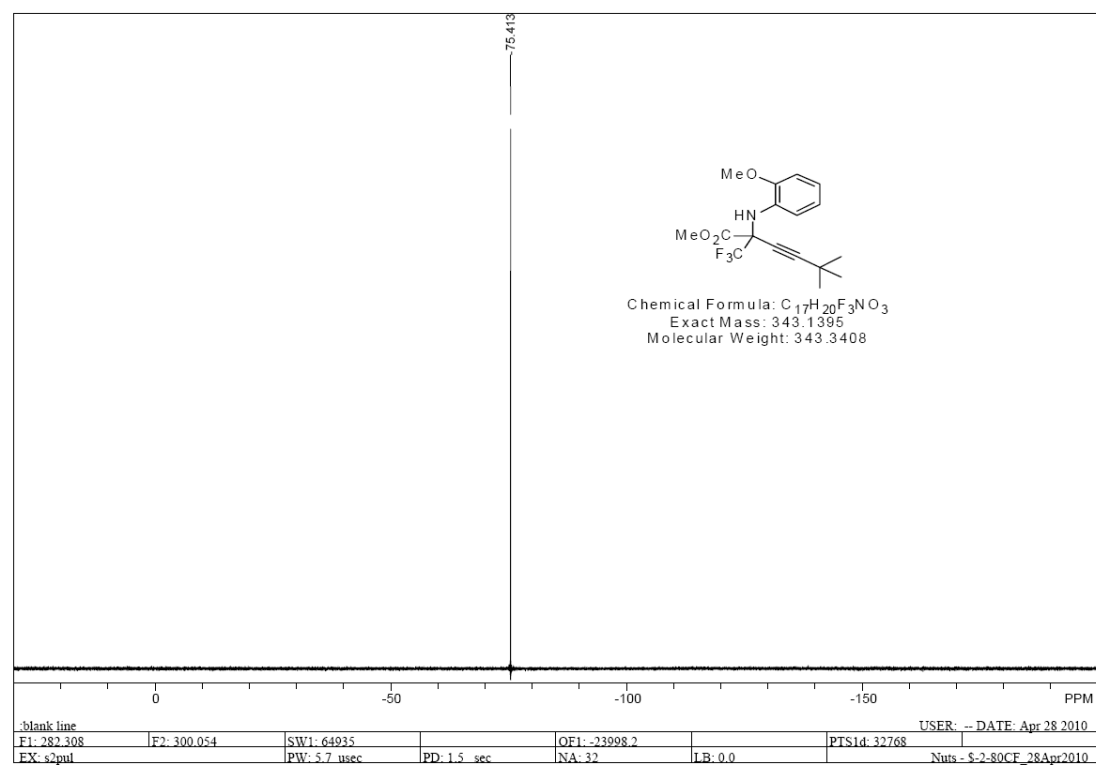

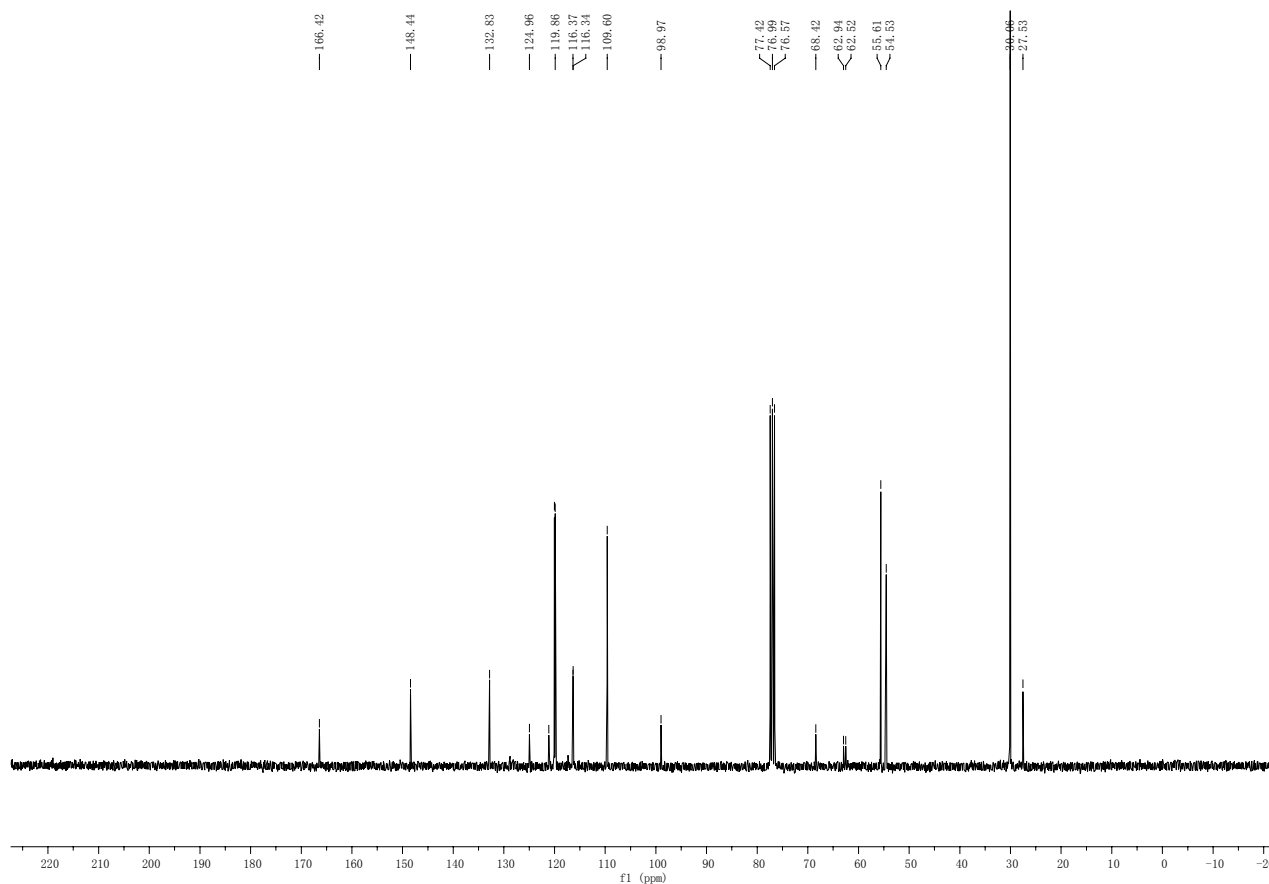

## Chiral HPLC Analysis of 3i

### HPLC Report

Sample Name: Data File: HGC-2-21+-.che  
Operator: Date: 2010-12-29  
Time: 10:51

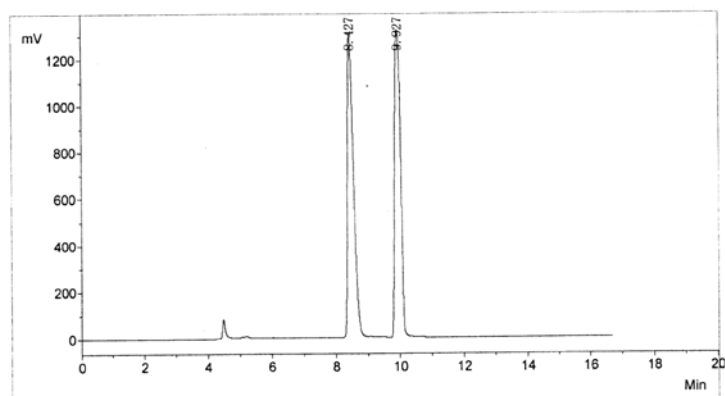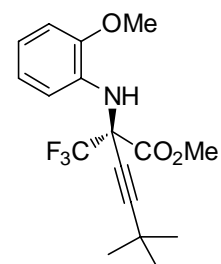

| No.   | PeakNo | R. Time | PeakHeight | PeakArea   | PerCent  |
|-------|--------|---------|------------|------------|----------|
| 1     | 1      | 8.427   | 1304768.9  | 17223561.3 | 49.9477  |
| 2     | 2      | 9.927   | 1322731.0  | 17259646.5 | 50.0523  |
| Total |        |         | 2627499.9  | 34483207.8 | 100.0000 |

## HPLC Report

Sample Name:

Data File:HGC-4-66Q.che

Operator:

Date:2010-12-29

Time:11:26

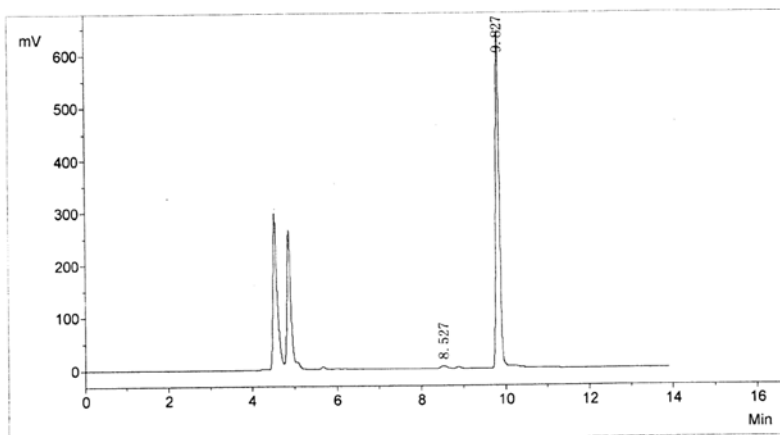

| No.   | PeakNo | R. Time | PeakHeight | PeakArea  | PerCent  |
|-------|--------|---------|------------|-----------|----------|
| 1     | 1      | 8.527   | 5175.4     | 54167.3   | 1.2686   |
| 2     | 2      | 9.827   | 638301.4   | 4215721.2 | 98.7314  |
| Total |        |         | 643476.8   | 4269888.5 | 100.0000 |

97.96%

before column chromatography

## HPLC Report

Sample Name:

Data File:HGC-4-66T.che

Operator:

Date:2010-12-29

Time:11:09

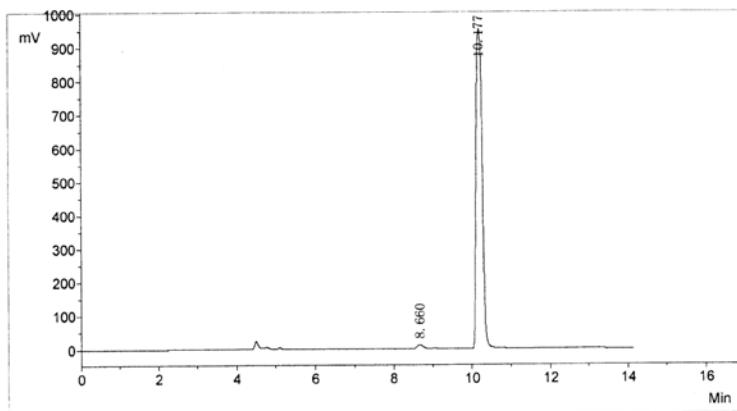

| No.   | PeakNo | R. Time | PeakHeight | PeakArea   | PerCent  |
|-------|--------|---------|------------|------------|----------|
| 1     | 1      | 8.660   | 11765.5    | 124800.2   | 1.1751   |
| 2     | 2      | 10.177  | 943712.7   | 10496015.8 | 98.8249  |
| Total |        |         | 955478.2   | 10620816.0 | 100.0000 |

after column chromatography

**(R)-Methyl 2-(2-methoxyphenylamino)-6-phenyl-2-(trifluoromethyl)hex-3-ynoate (3j).**

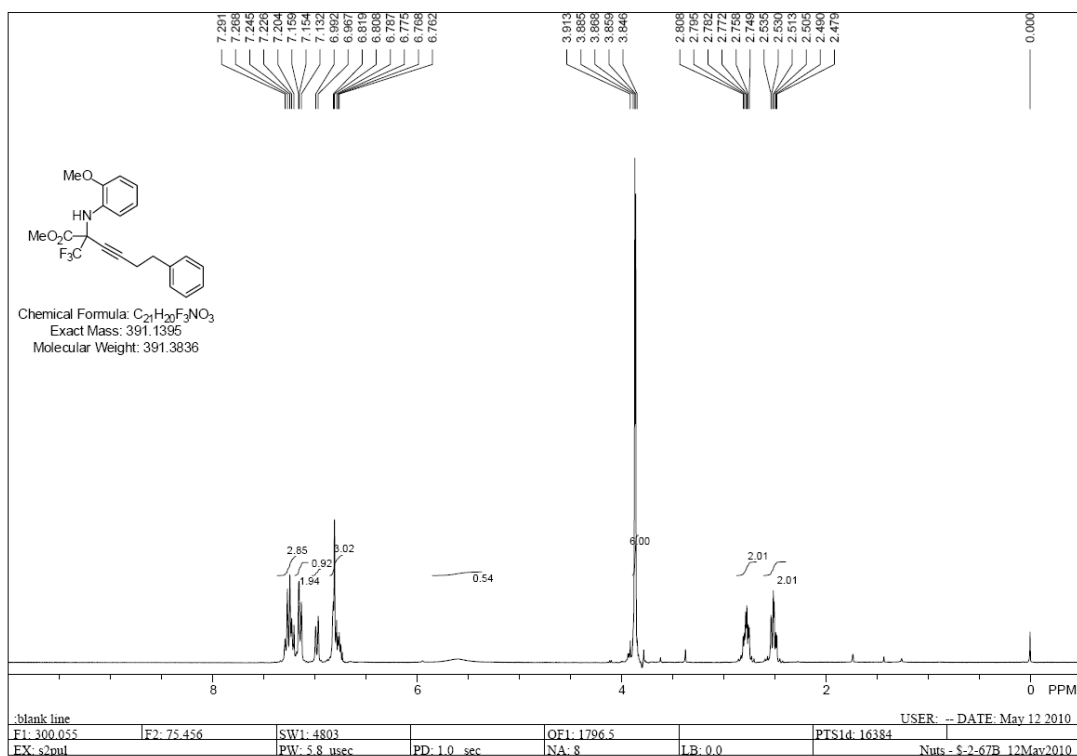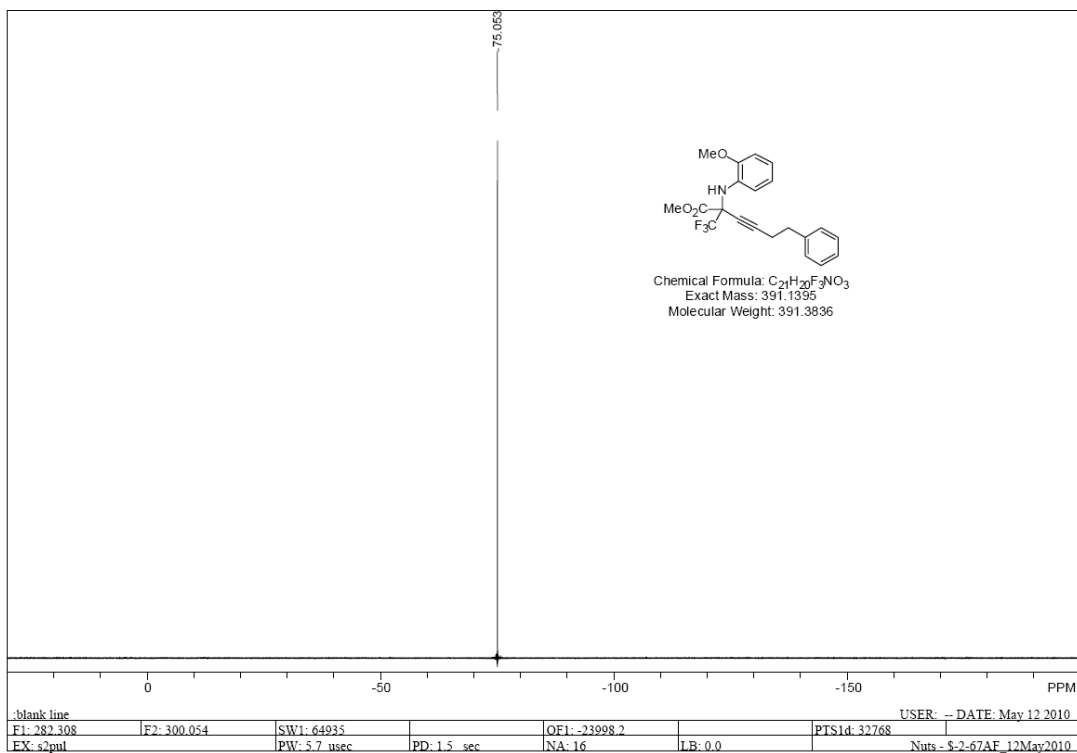

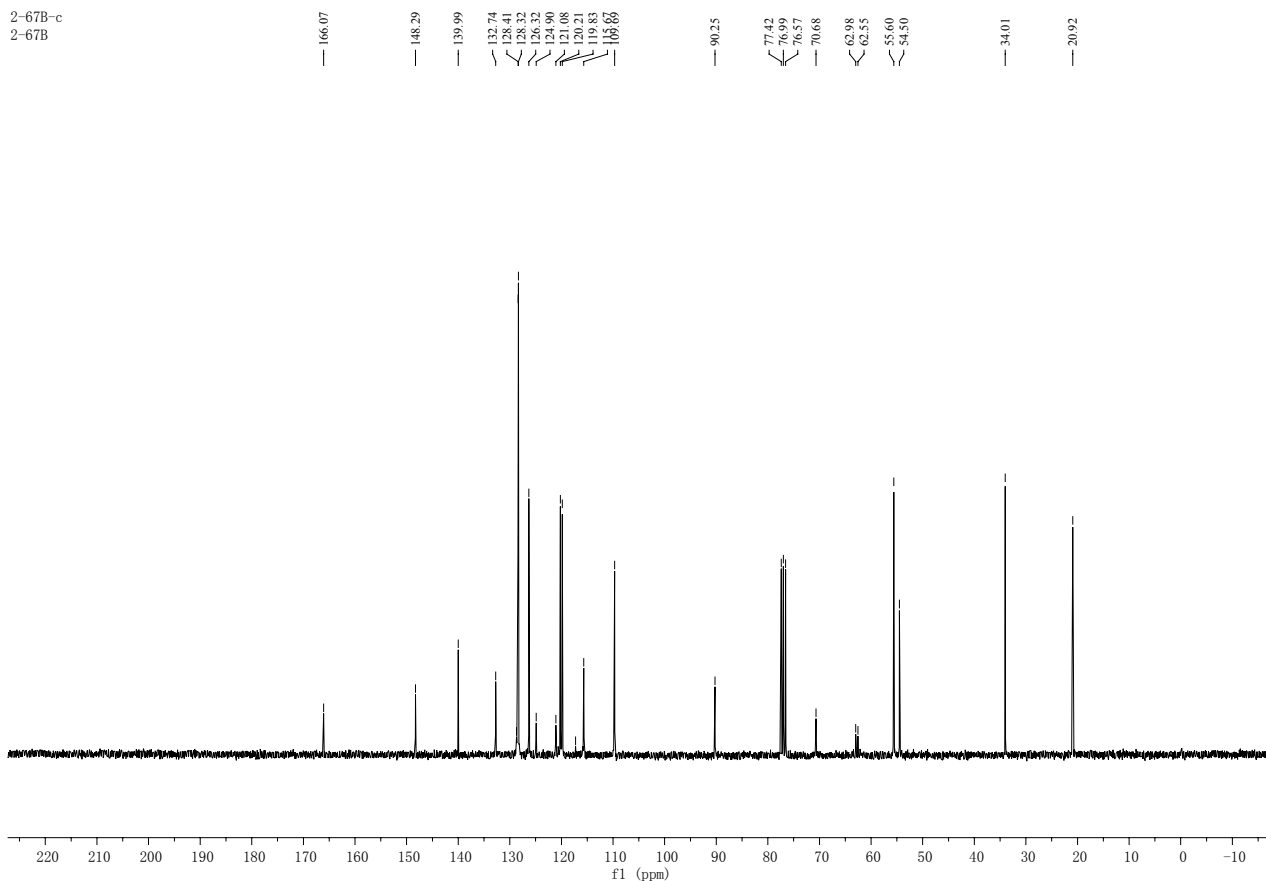

### Chiral HPLC Analysis of 3j

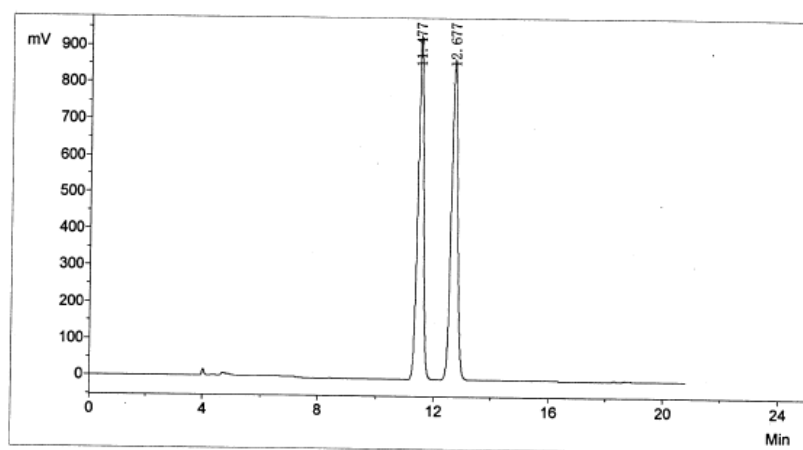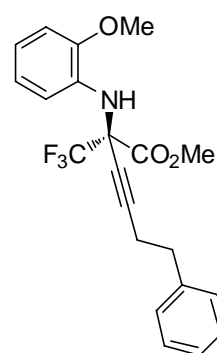

| No.   | PeakNo | ID. Name | R. Time | PeakHeight | PeakArea   | PerCent  |
|-------|--------|----------|---------|------------|------------|----------|
| 1     | 1      |          | 11.477  | 924158.5   | 12936033.2 | 49.0785  |
| 2     | 2      |          | 12.677  | 872668.6   | 13421786.7 | 50.9215  |
| Total |        |          |         | 1796827.0  | 26357819.9 | 100.0000 |

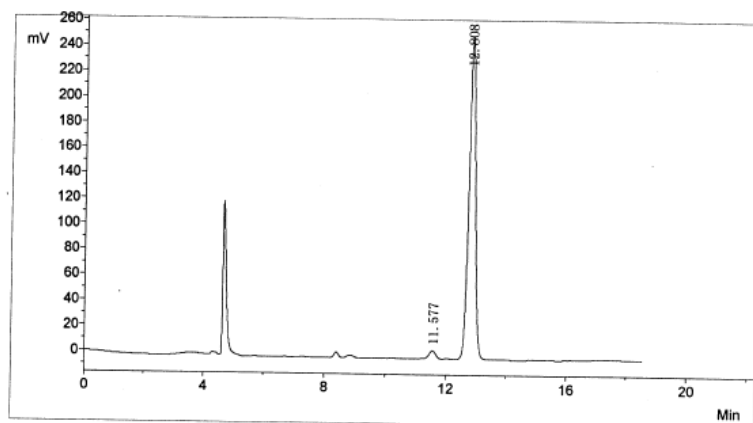

| No.   | PeakNo | ID. Name | R. Time | PeakHeight | PeakArea  | PerCent  |
|-------|--------|----------|---------|------------|-----------|----------|
| 1     | 1      |          | 11.577  | 6225.8     | 96006.2   | 2.4682   |
| 2     | 2      |          | 12.808  | 251919.7   | 3793692.4 | 97.5318  |
| Total |        |          |         | 258145.5   | 3889698.6 | 100.0000 |

before column chromatography

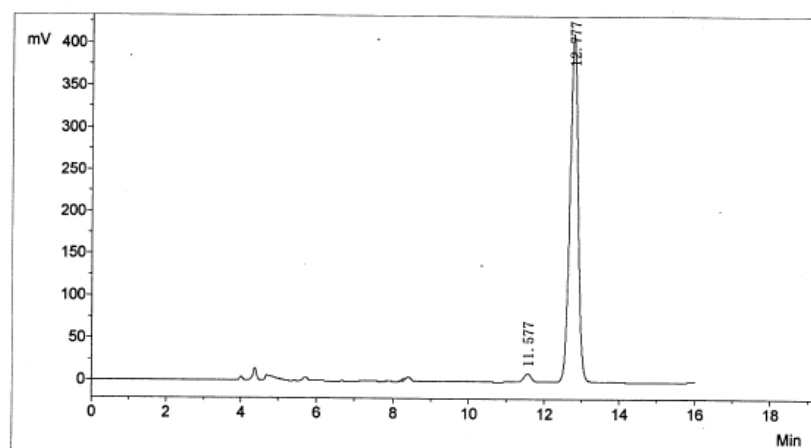

| No.   | PeakNo | ID. Name | R. Time | PeakHeight | PeakArea  | PerCent  |
|-------|--------|----------|---------|------------|-----------|----------|
| 1     | 1      |          | 11.577  | 9758.2     | 141981.6  | 2.2206   |
| 2     | 2      |          | 12.777  | 405925.6   | 6251899.5 | 97.7794  |
| Total |        |          |         | 415683.9   | 6393881.0 | 100.0000 |

after column chromatography



**(R)-Methyl 2-(2-methoxyphenylamino)-2-(trifluoromethyl)dec-3-ynoate (3k).**

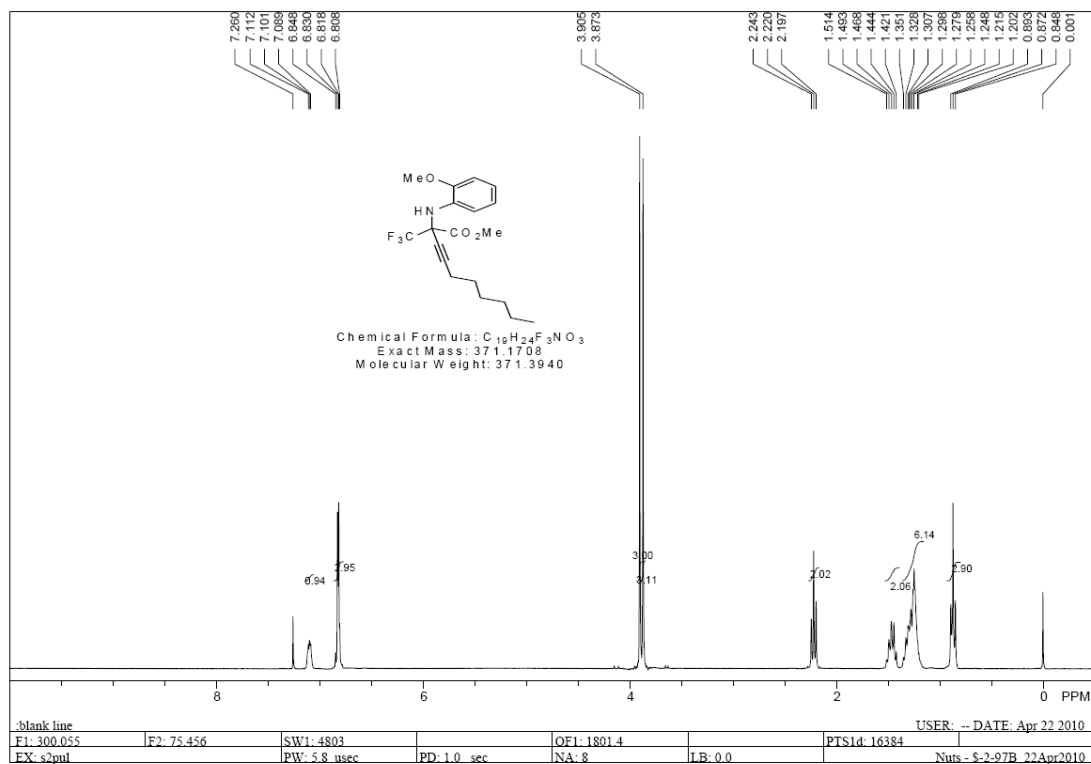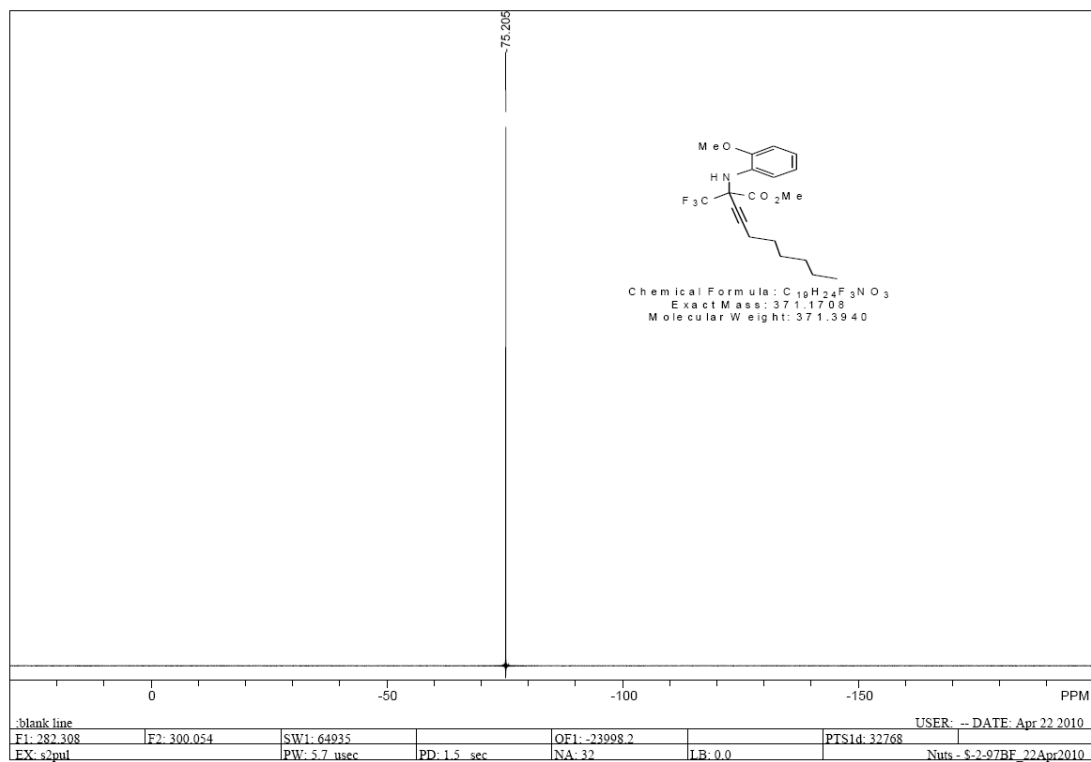

2-97B-c  
2-97B

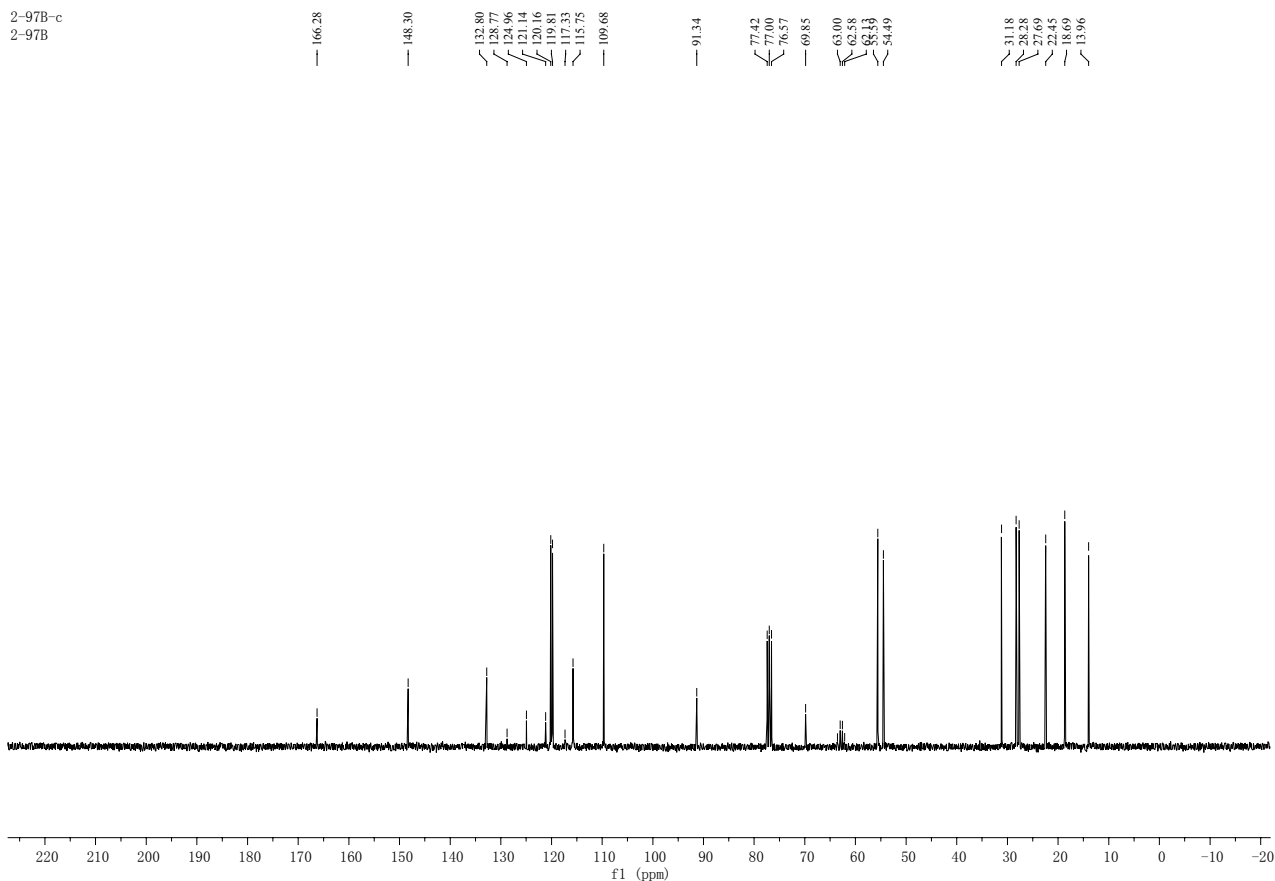

## Chiral HPLC Analysis of 3k

### HPLC Report

Sample Name:

Data File:HGC-2-90A+-.che

Operator:

Date:2010-12-28

Time:12:38

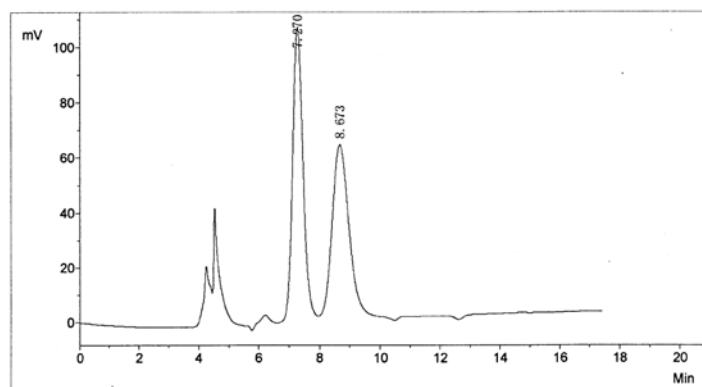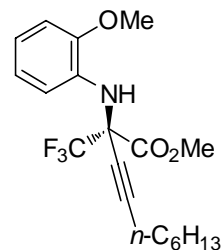

| No.   | PeakNo | ID. Name | R. Time | PeakHeight | PeakArea  | PerCent  |
|-------|--------|----------|---------|------------|-----------|----------|
| 1     | 1      |          | 7.270   | 105646.2   | 2471514.5 | 51.1821  |
| 2     | 2      |          | 8.673   | 62258.4    | 2357351.8 | 48.8179  |
| Total |        |          |         | 167904.6   | 4828866.2 | 100.0000 |

## HPLC Report

Sample Name: Data File:HGC-4-74Q.che  
Operator: Date:2010-12-28  
Time:13:20

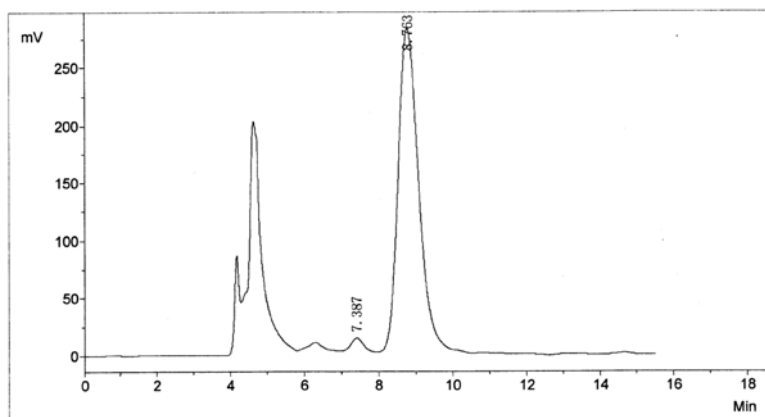

| No.   | PeakNo | ID. Name | R. Time | PeakHeight | PeakArea   | PerCent  |
|-------|--------|----------|---------|------------|------------|----------|
| 1     | 1      |          | 7.387   | 10106.6    | 195413.8   | 1.8831   |
| 2     | 2      |          | 8.763   | 276291.7   | 10181971.4 | 98.1169  |
| Total |        |          |         | 286398.3   | 10377385.2 | 100.0000 |

before column chromatography

## HPLC Report

Sample Name: Data File:HGC-4-74T.che  
Operator: Date:2010-12-28  
Time:12:59

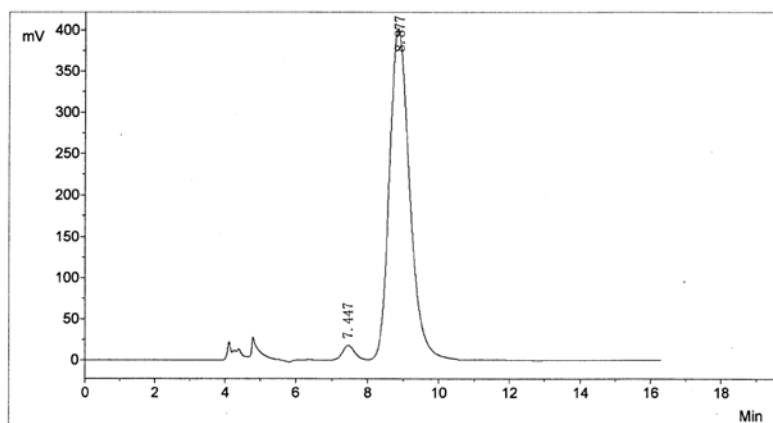

| No.   | PeakNo | ID. Name | R. Time | PeakHeight | PeakArea   | PerCent  |
|-------|--------|----------|---------|------------|------------|----------|
| 1     | 1      |          | 7.447   | 16028.6    | 331337.4   | 2.0607   |
| 2     | 2      |          | 8.877   | 397929.4   | 15747339.6 | 97.9393  |
| Total |        |          |         | 413958.0   | 16078677.0 | 100.0000 |

after column chromatography

**(S)-Methyl 2-(2-methoxyphenylamino)-2-(trifluoromethyl)-4-(trimethylsilyl)but-3-ynoate (3l).**

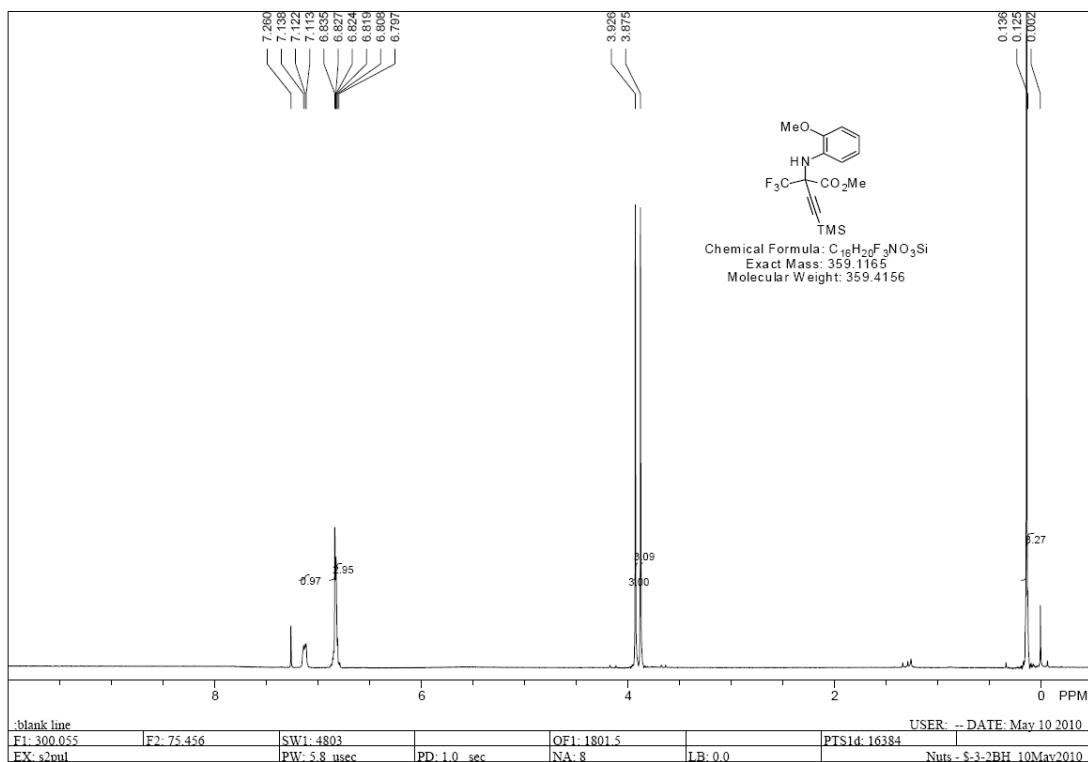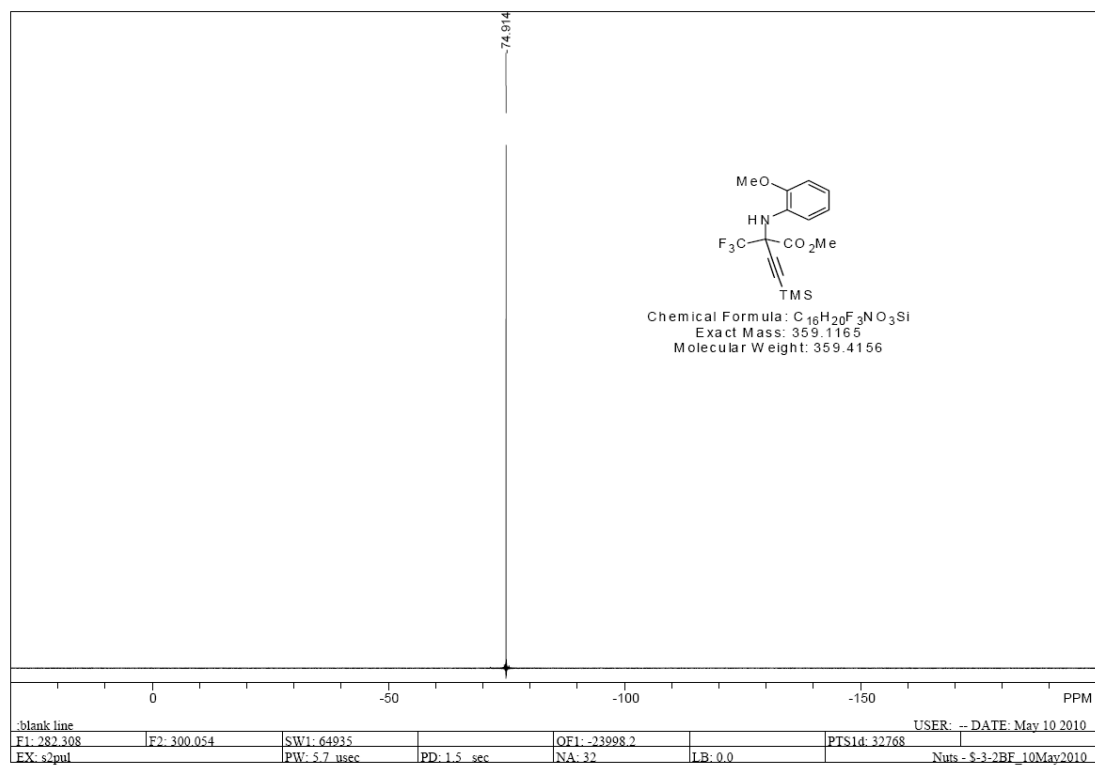

3-2B-C  
3-2B

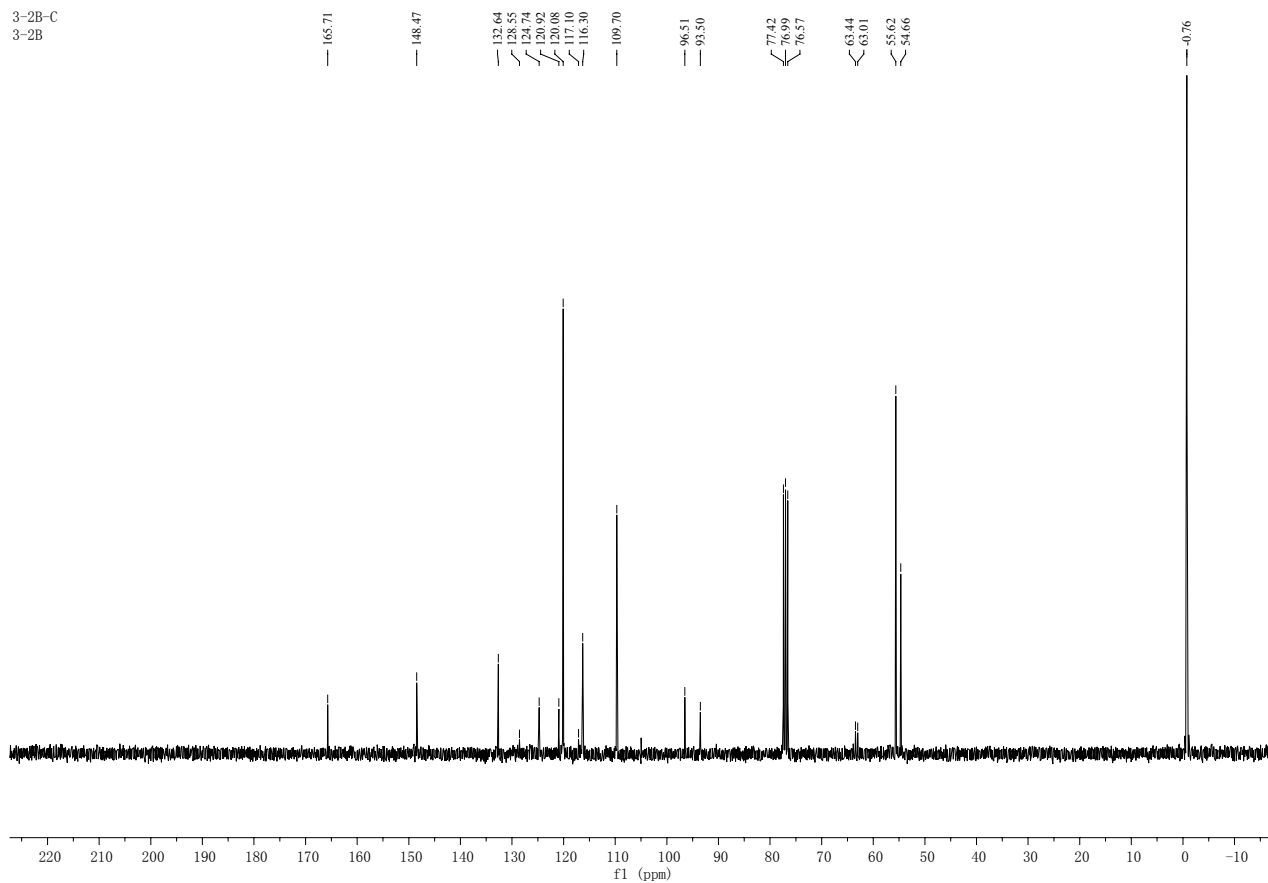

## Chiral HPLC Analysis of 3l

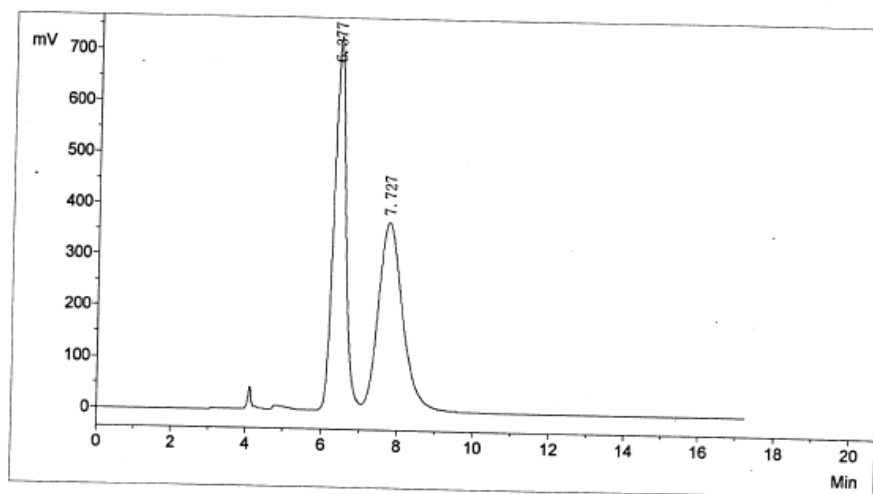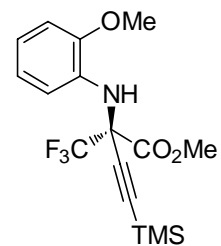

| No.   | PeakNo | ID. Name | R. Time | PeakHeight | PeakArea   | PerCent  |
|-------|--------|----------|---------|------------|------------|----------|
| 1     | 1      |          | 6.377   | 716992.7   | 15971217.7 | 49.1193  |
| 2     | 2      |          | 7.727   | 367667.3   | 16543929.5 | 50.8807  |
| Total |        |          |         | 1084660.0  | 32515147.3 | 100.0000 |

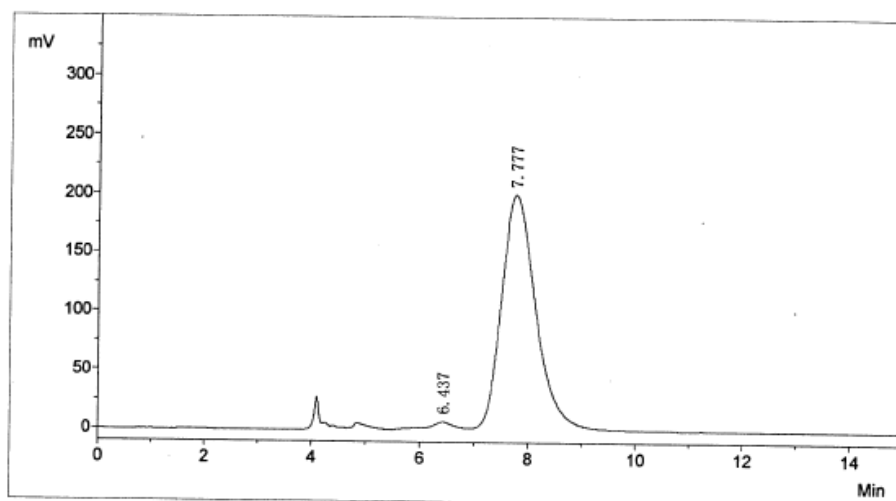

| No.   | PeakNo | ID. Name | R. Time | PeakHeight | PeakArea  | PerCent  |
|-------|--------|----------|---------|------------|-----------|----------|
| 1     | 1      |          | 6.437   | 4913.4     | 101610.2  | 1.1534   |
| 2     | 2      |          | 7.777   | 198488.0   | 8708159.6 | 98.8466  |
| Total |        |          |         | 203401.4   | 8809769.8 | 100.0000 |

after column chromatography

**(R)-Methyl 5-(tert-butyldimethylsilyloxy)-2-(2-methoxyphenylamino)-2-(trifluoromethyl)pent-3-ynoate (3m).**

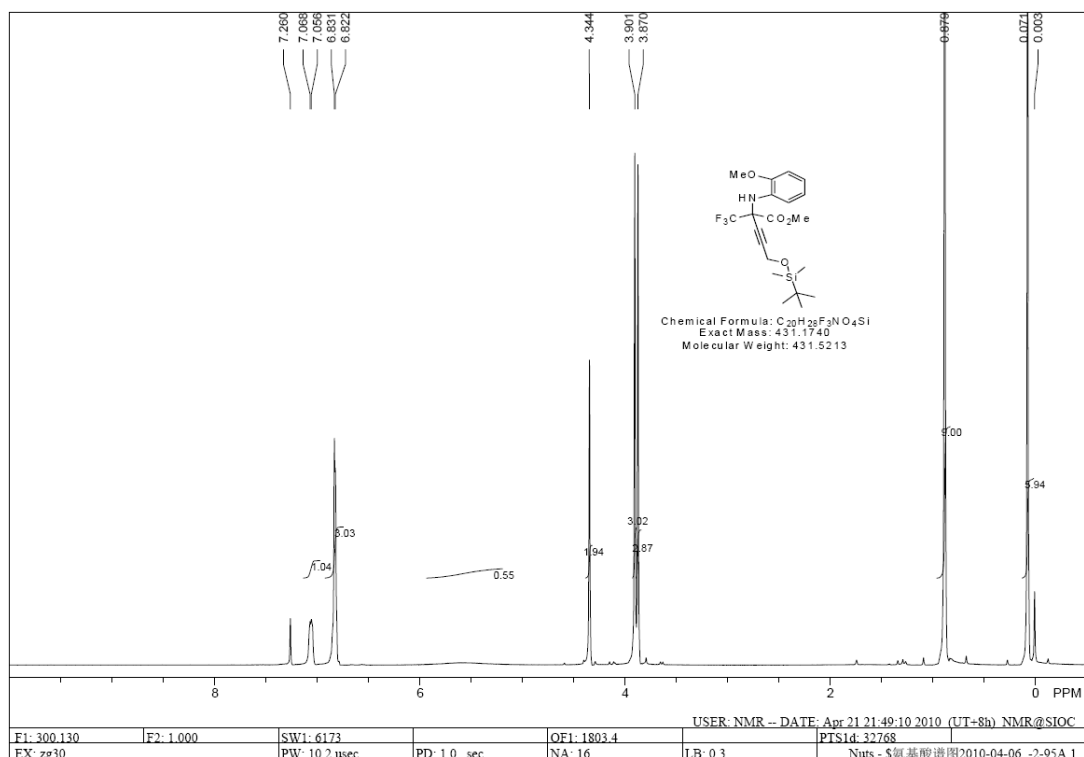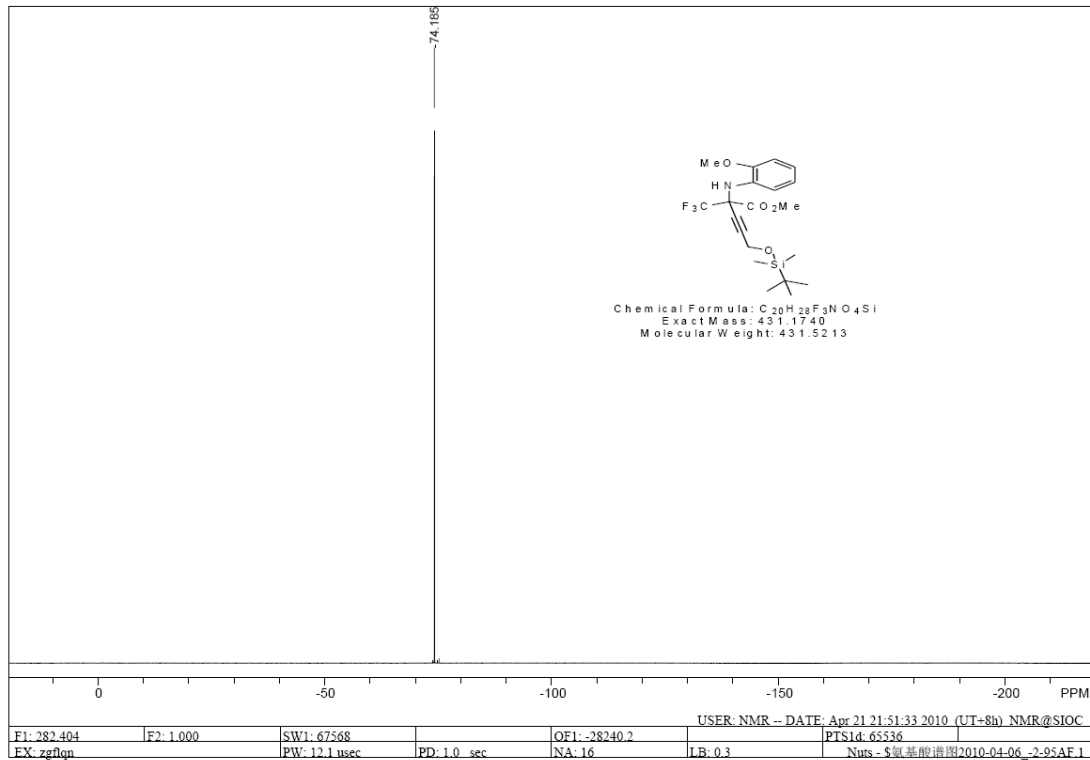

2-95A-C  
2-95A

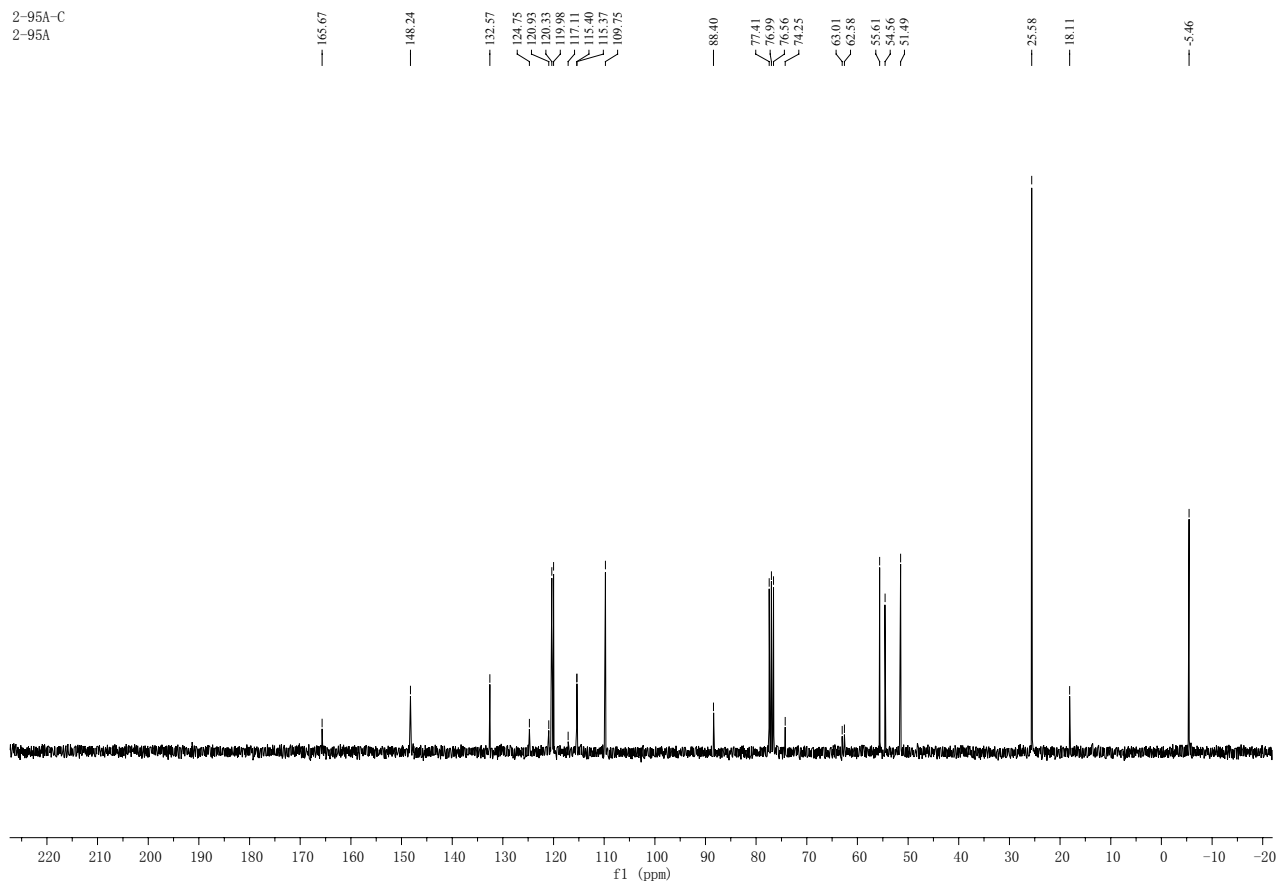



## Chiral HPLC Analysis of 3m

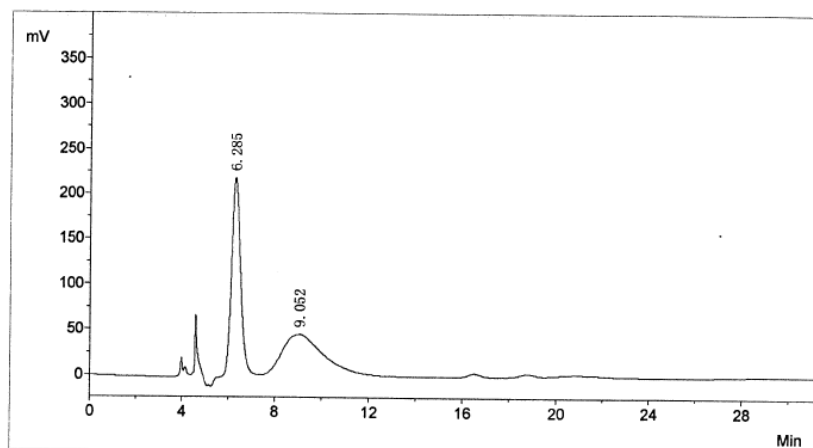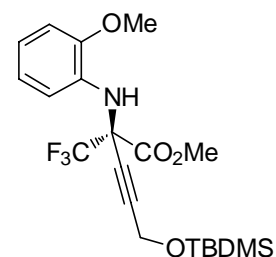

| No.   | PeakNo | ID. Name | R. Time | PeakHeight | PeakArea   | PerCent  |
|-------|--------|----------|---------|------------|------------|----------|
| 1     | 1      |          | 6.285   | 220558.2   | 6066888.6  | 50.2469  |
| 2     | 2      |          | 9.052   | 46869.1    | 6007278.3  | 49.7531  |
| Total |        |          |         | 267427.4   | 12074166.8 | 100.0000 |

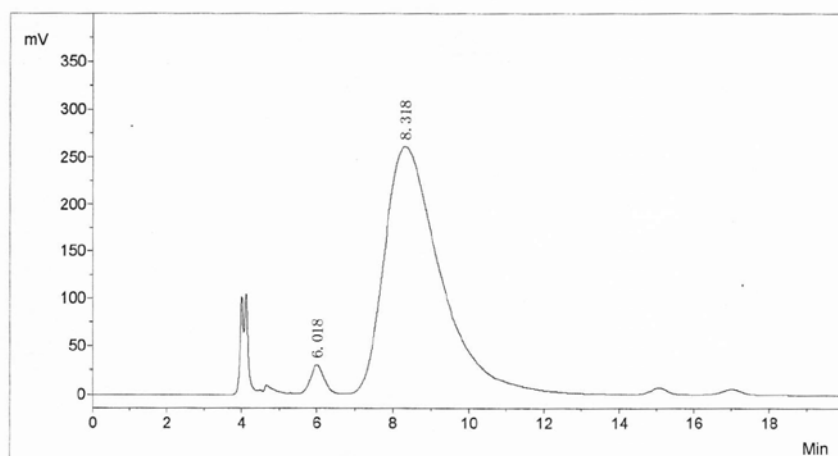

| No.   | PeakNo | ID. Name | R. Time | PeakHeight | PeakArea   | PerCent  |
|-------|--------|----------|---------|------------|------------|----------|
| 1     | 1      |          | 6.018   | 28887.4    | 719545.4   | 2.6446   |
| 2     | 2      |          | 8.318   | 260364.9   | 26488698.9 | 97.3554  |
| Total |        |          |         | 289252.3   | 27208244.3 | 100.0000 |

after column chromatography

## Gram-scale catalytic asymmetric synthesis of 3a

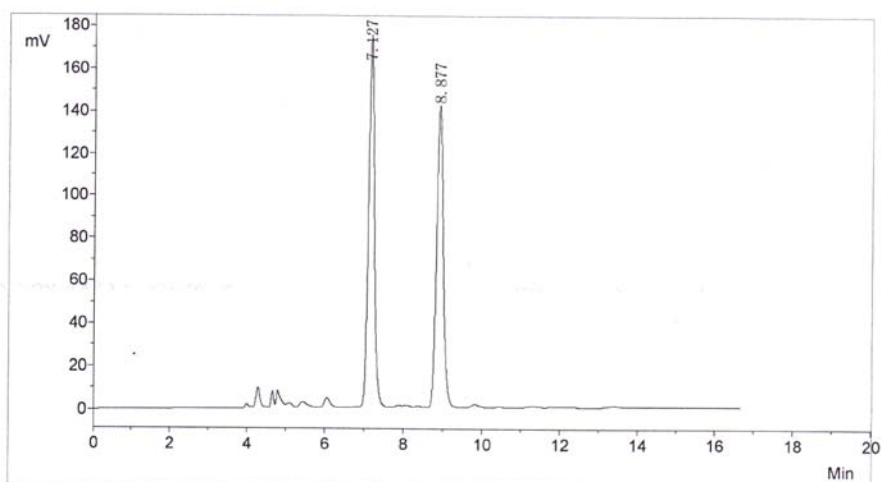

| No.   | PeakNo | ID. Name | R. Time | PeakHeight | PeakArea  | PerCent  |
|-------|--------|----------|---------|------------|-----------|----------|
| 1     | 1      |          | 7.127   | 163672.7   | 1836024.8 | 52.3244  |
| 2     | 2      |          | 8.877   | 139045.0   | 1672900.3 | 47.6756  |
| Total |        |          |         | 302717.8   | 3508925.1 | 100.0000 |

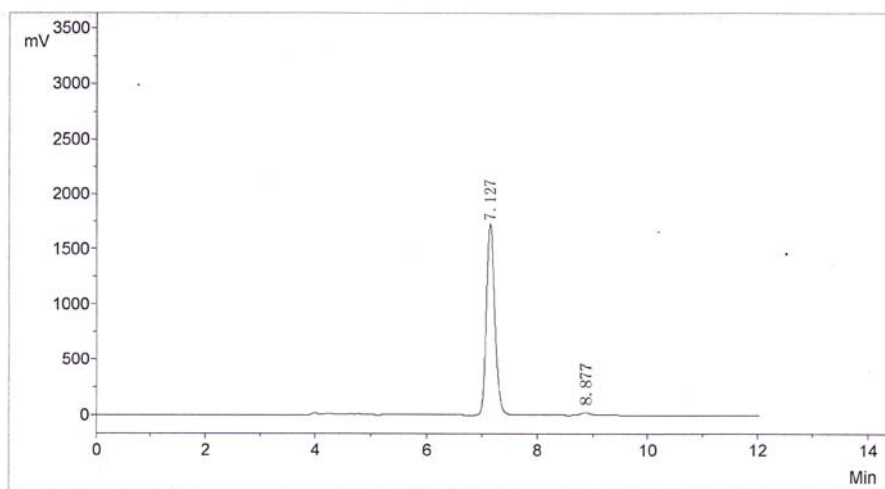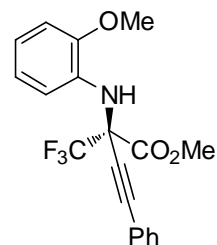

| No.   | PeakNo | ID. Name | R. Time | PeakHeight | PeakArea   | PerCent  |
|-------|--------|----------|---------|------------|------------|----------|
| 1     | 1      |          | 7.127   | 1691706.6  | 18376725.7 | 98.3921  |
| 2     | 2      |          | 8.877   | 22916.8    | 300313.9   | 1.6079   |
| Total |        |          |         | 1714623.4  | 18677039.6 | 100.0000 |

after column chromatography

## Gram-scale catalytic asymmetric synthesis of 3m

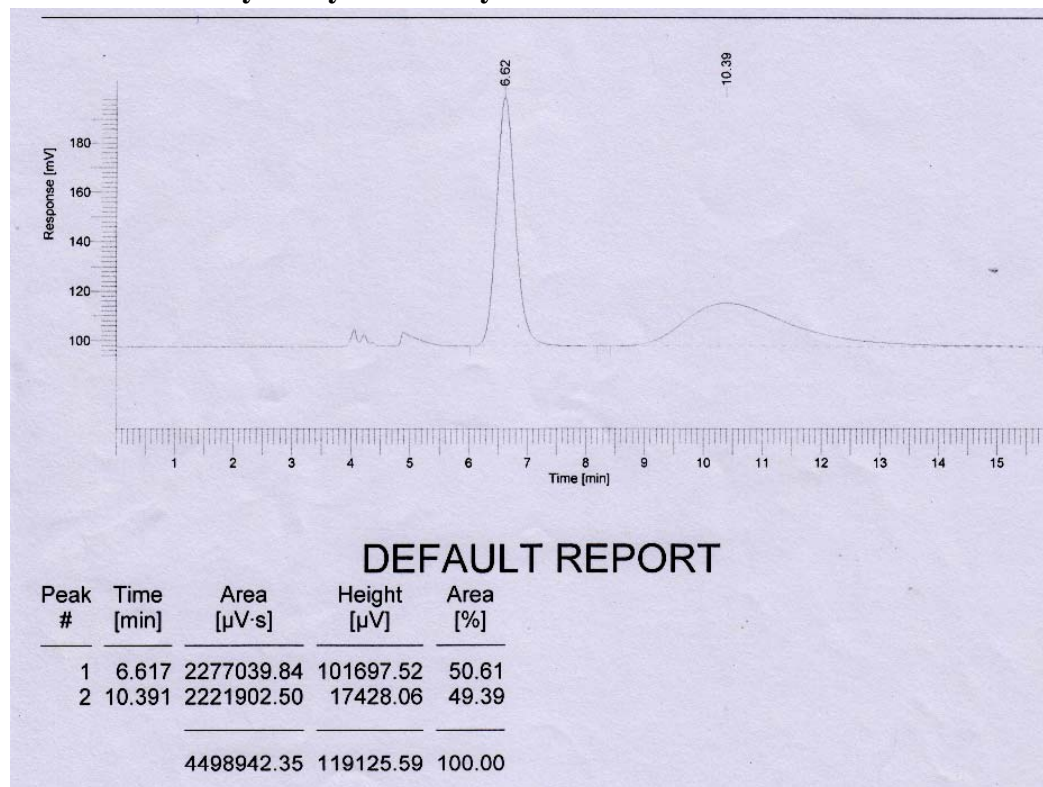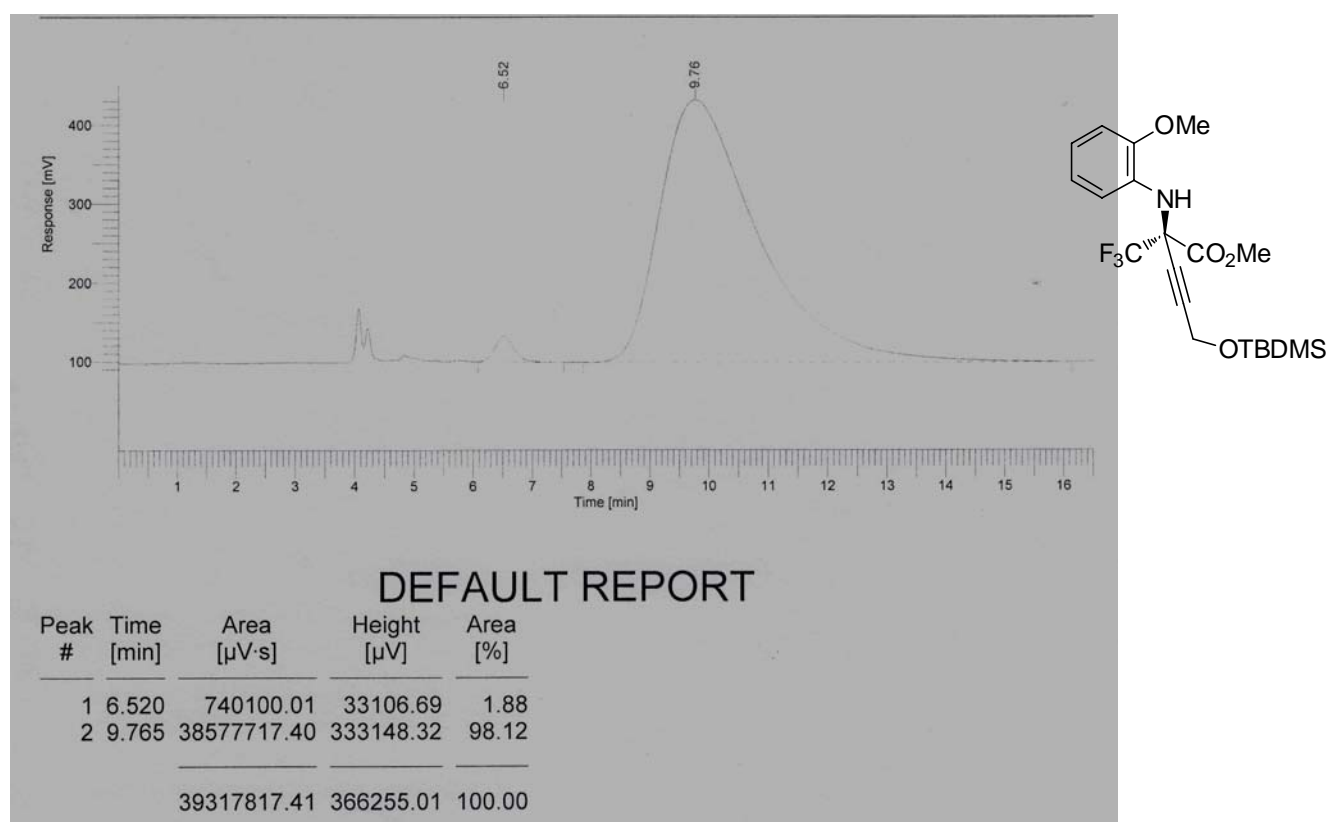

after column chromatography

**(R)-methyl 2-((2-methoxyphenyl)amino)-2-(trifluoromethyl)but-3-ynoate (5).**

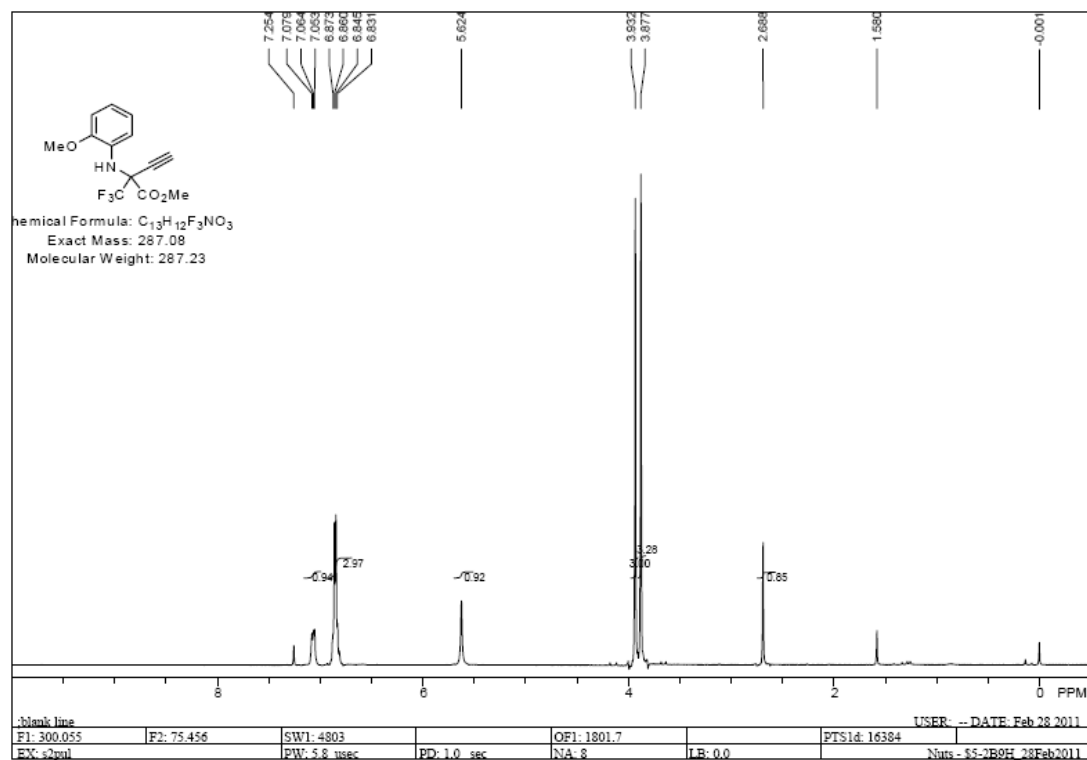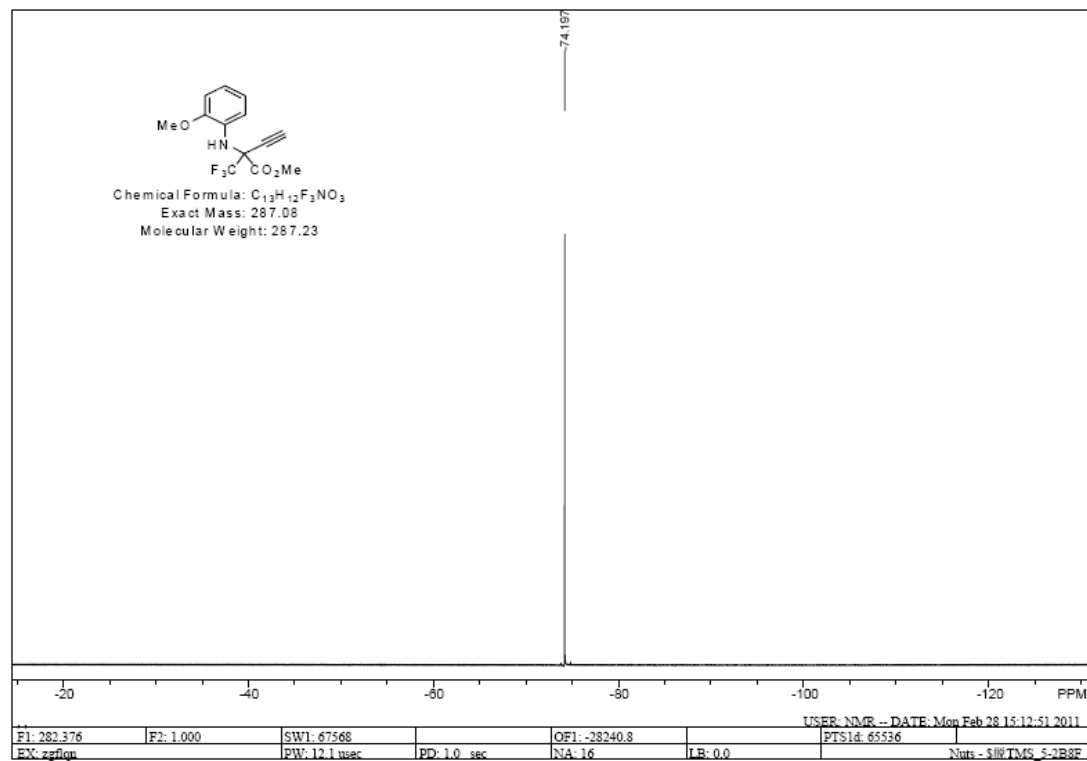

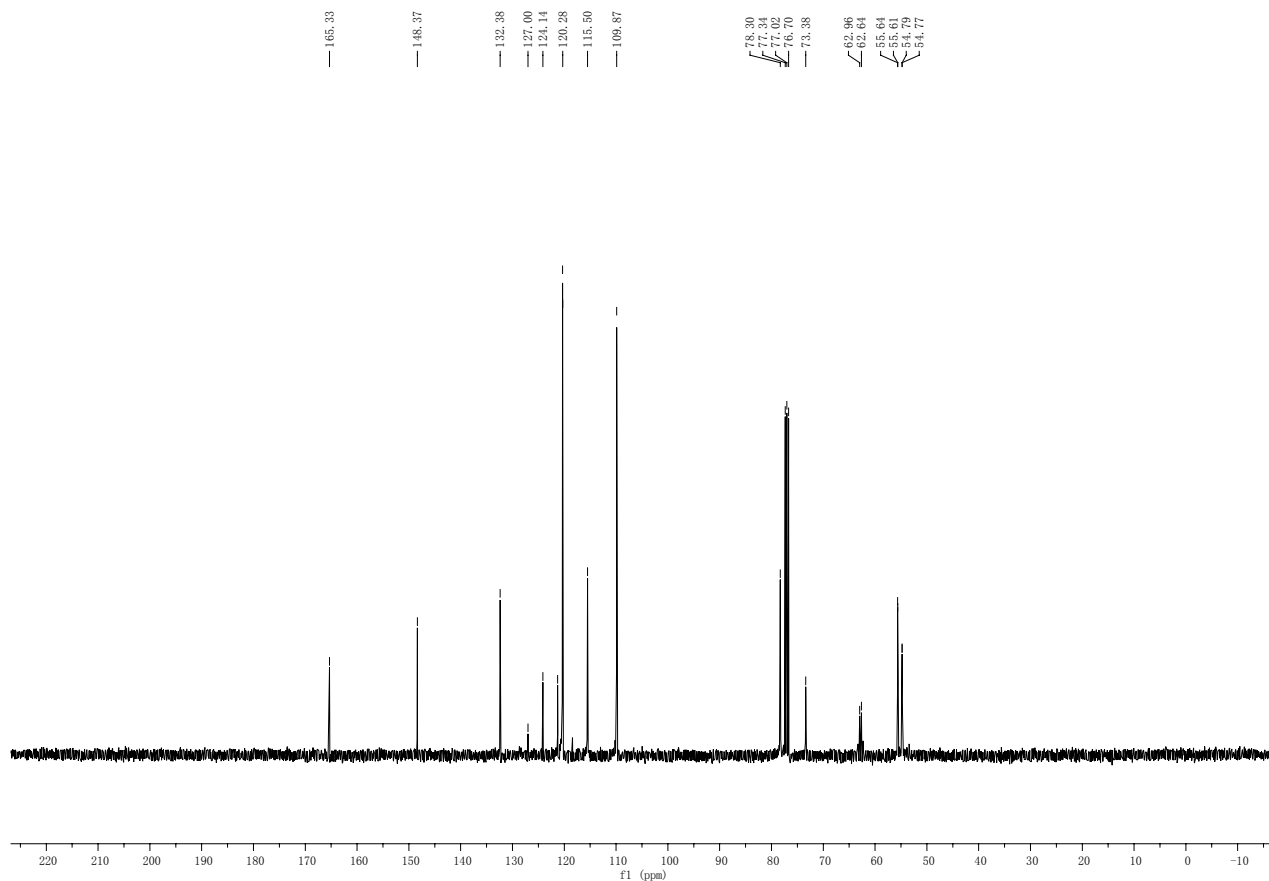

**(*R*)-methyl 4-(benzo[*d*]thiazol-2-yl)-2-((2-methoxyphenyl)amino)-2-(trifluoromethyl)but-3-ynoate (6).**

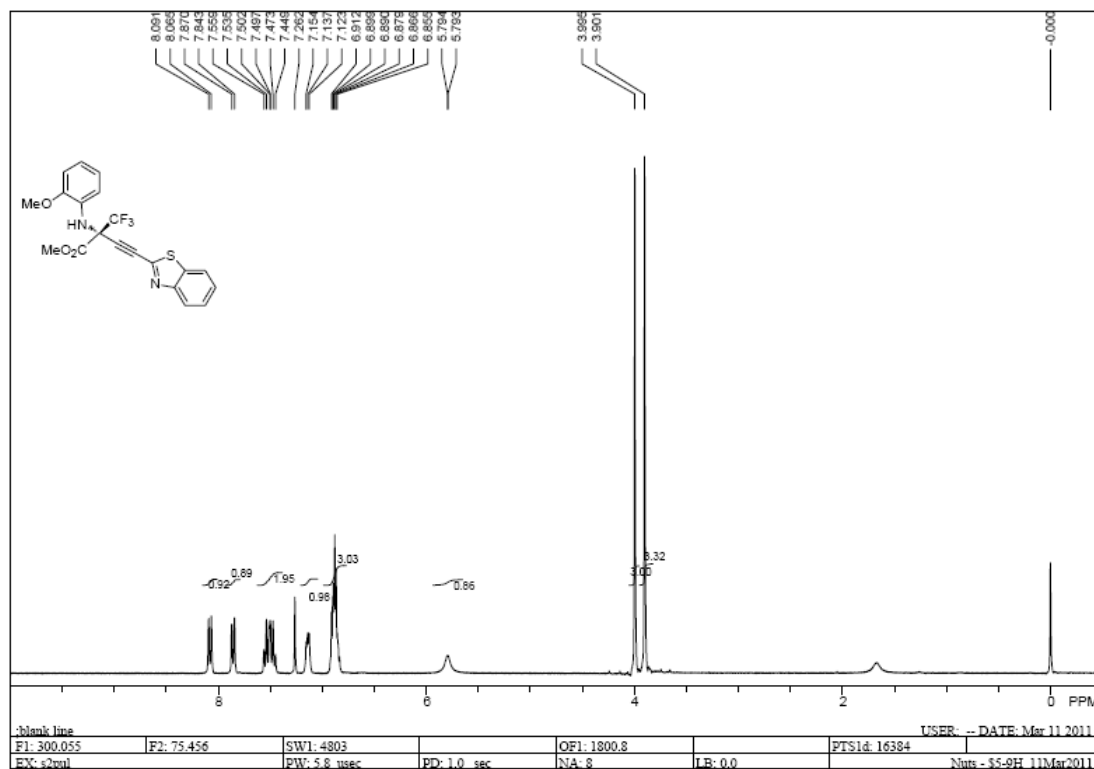

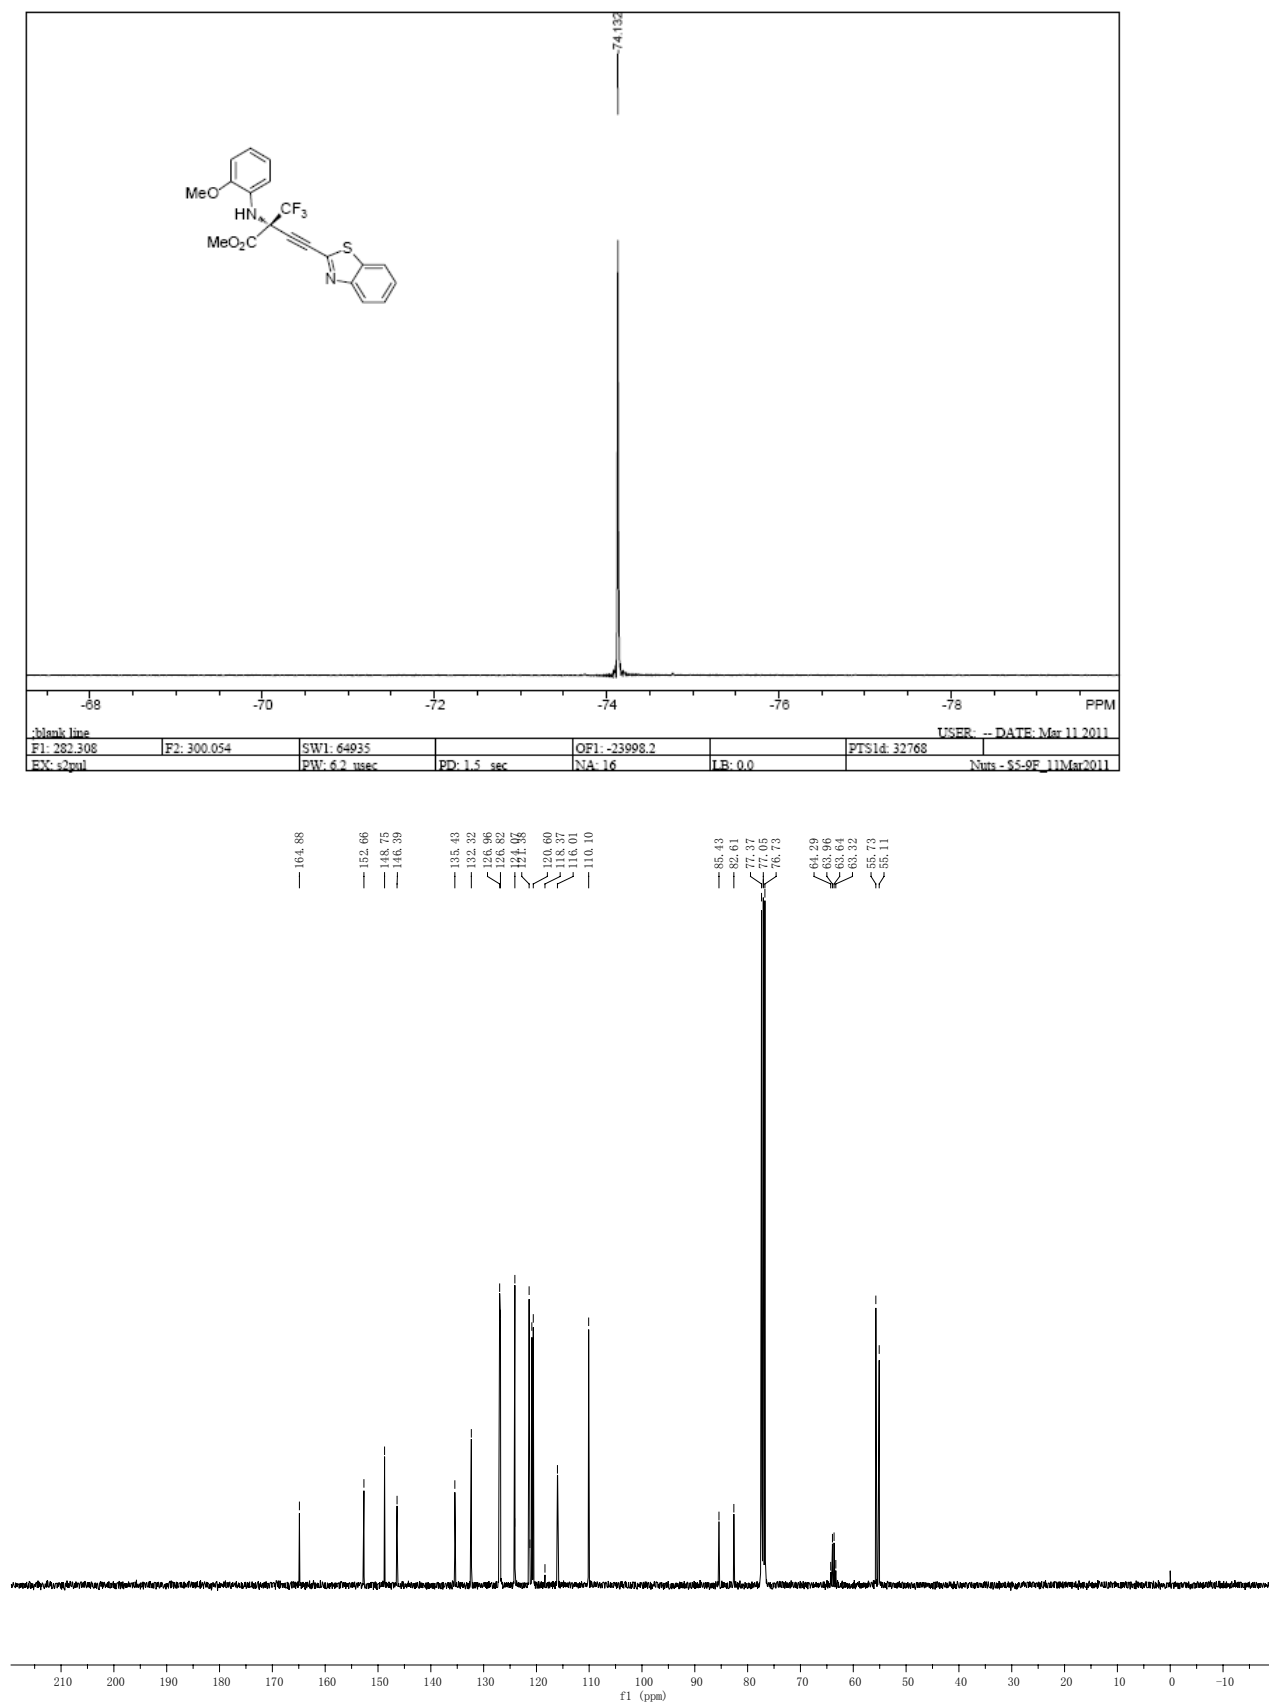

**(R)-Methyl 2-(2-methoxyphenylamino)-4-phenyl-2-(trifluoromethyl)butanoate (7').**

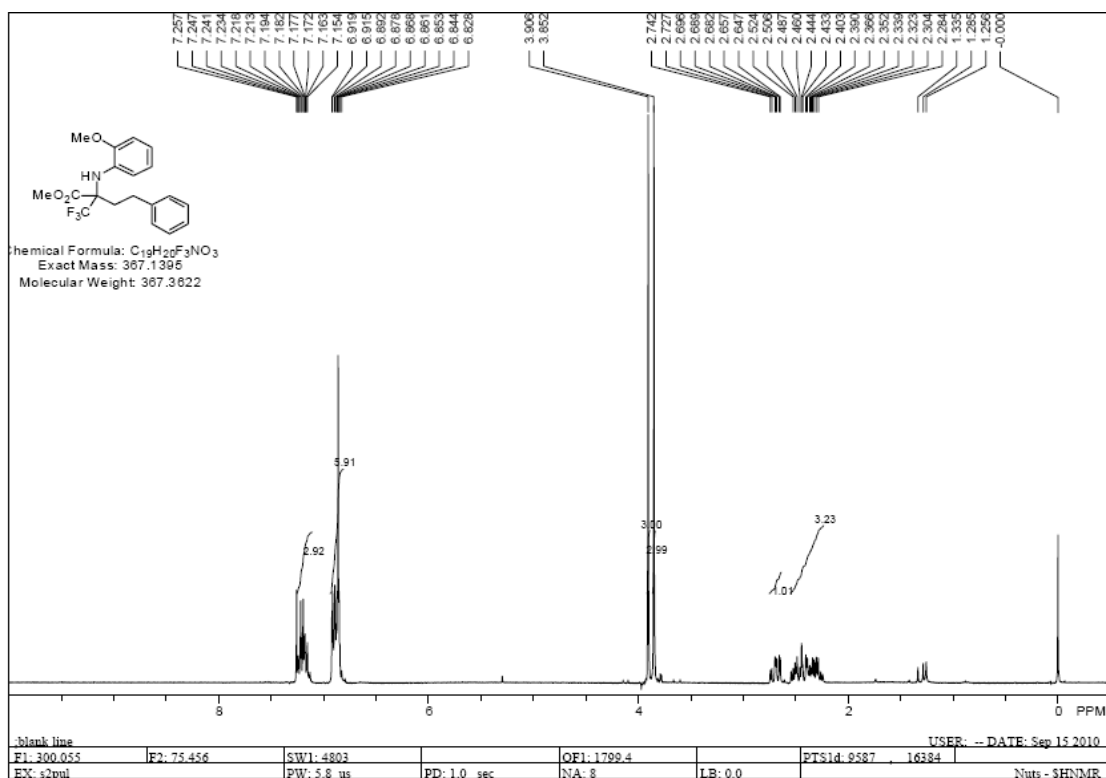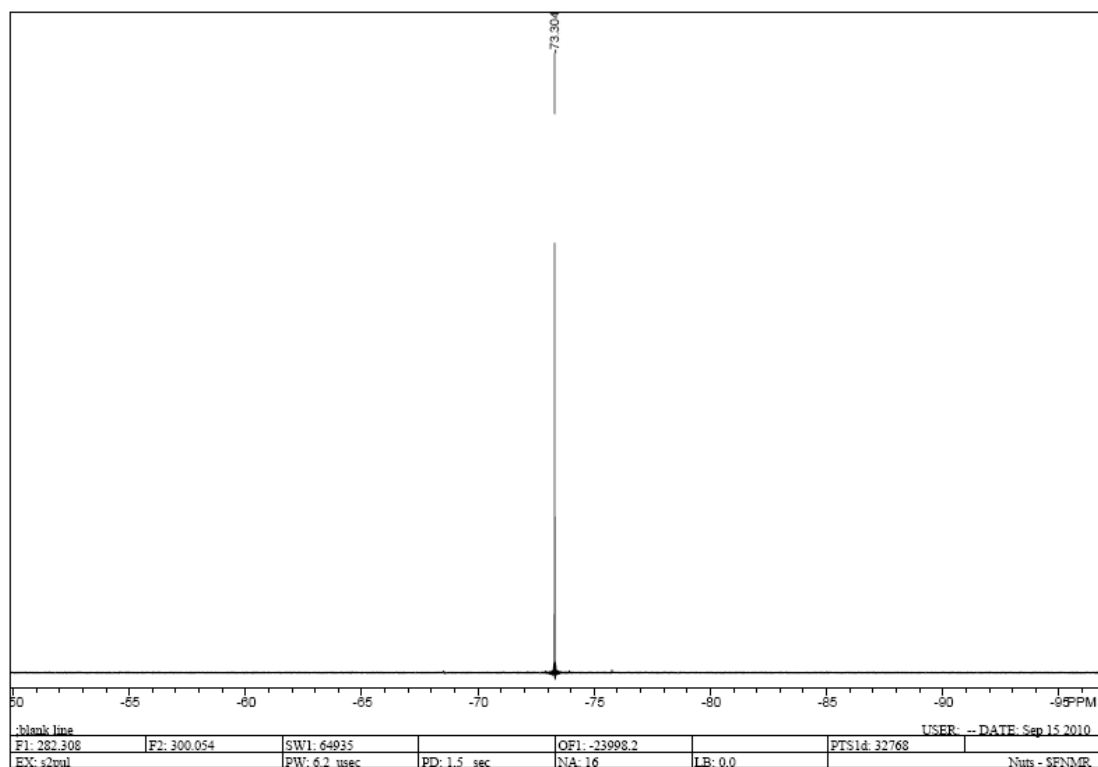

hgc-4-4-c  
hgc-4-4

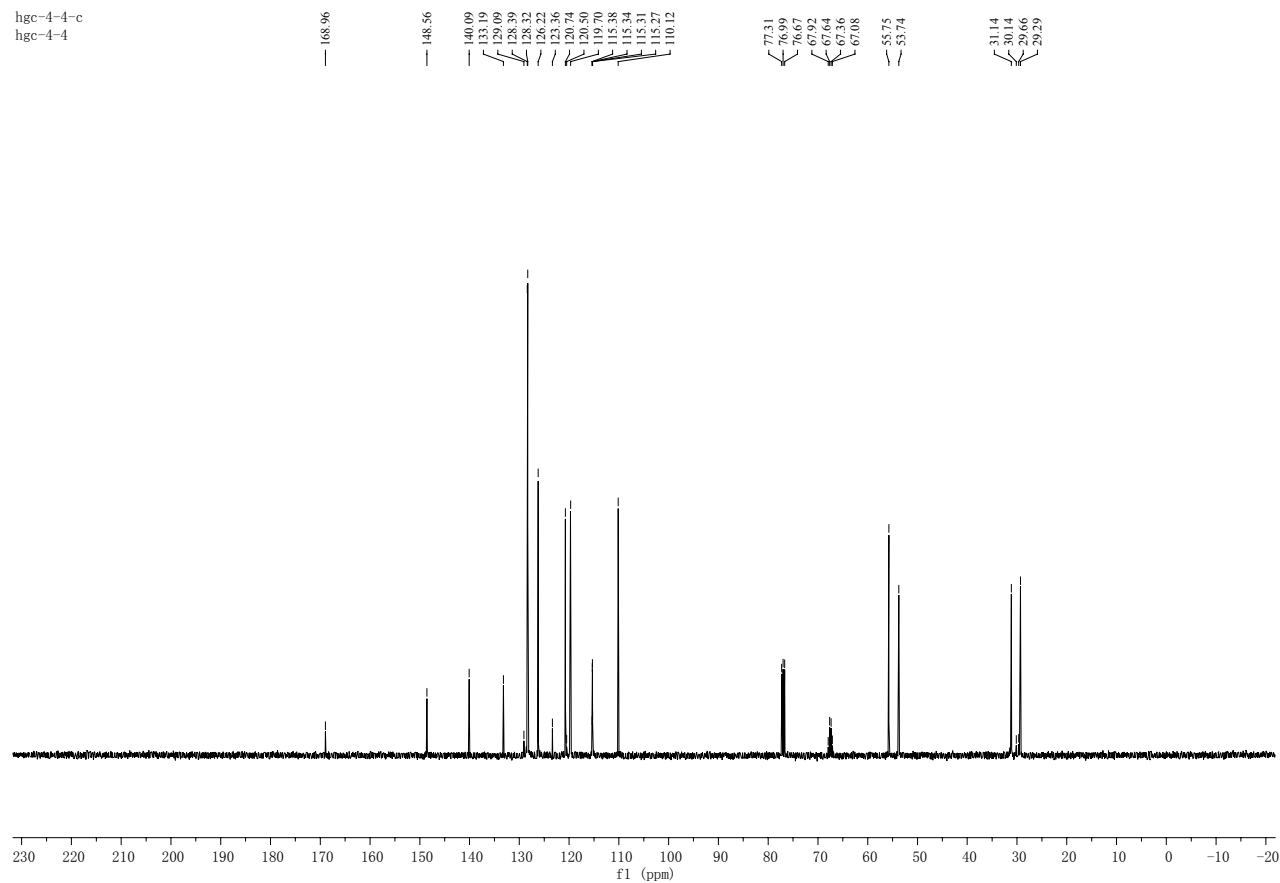



# Chiral HPLC Analysis of 7'

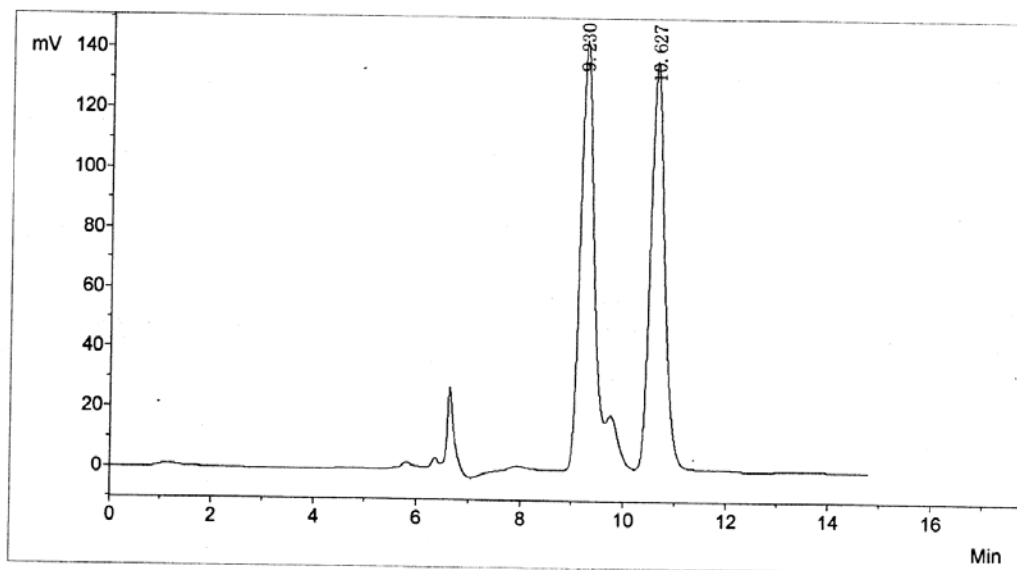

| No.   | PeakNo | ID. Name | R. Time | PeakHeight | PeakArea  | PerCent  |
|-------|--------|----------|---------|------------|-----------|----------|
| 1     | 1      |          | 9.230   | 135165.2   | 2255122.4 | 46.5269  |
| 2     | 2      |          | 10.627  | 133249.8   | 2591797.2 | 53.4731  |
| Total |        |          |         | 268415.0   | 4846919.6 | 100.0000 |

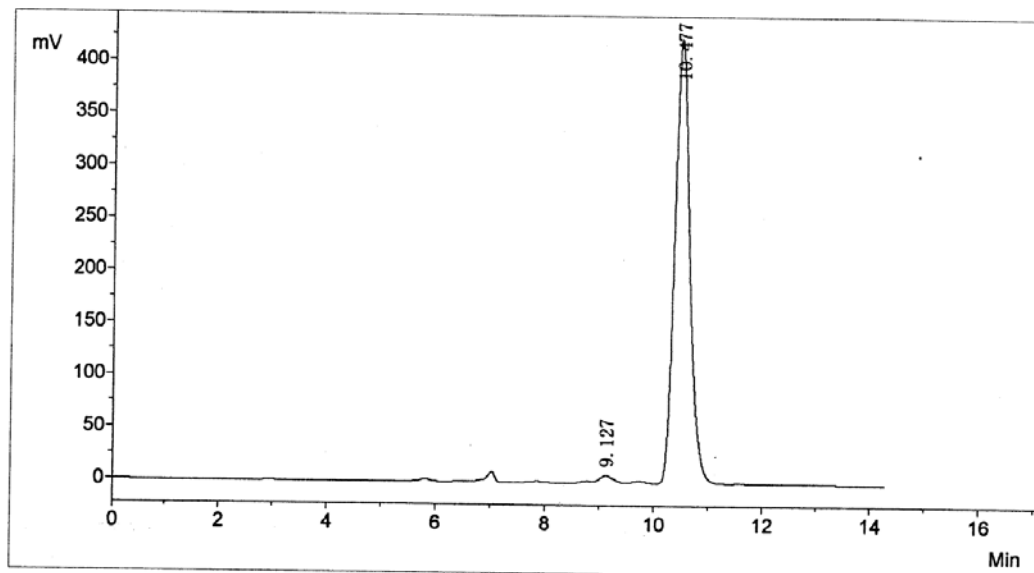

| No.   | PeakNo | ID. Name | R. Time | PeakHeight | PeakArea  | PerCent  |
|-------|--------|----------|---------|------------|-----------|----------|
| 1     | 1      |          | 9.127   | 6028.2     | 94128.8   | 1.1344   |
| 2     | 2      |          | 10.477  | 417956.6   | 8203551.9 | 98.8656  |
| Total |        |          |         | 423984.8   | 8297680.7 | 100.0000 |

**(R)-Methyl 2-amino-4-phenyl-2-(trifluoromethyl)butanoate (7).**

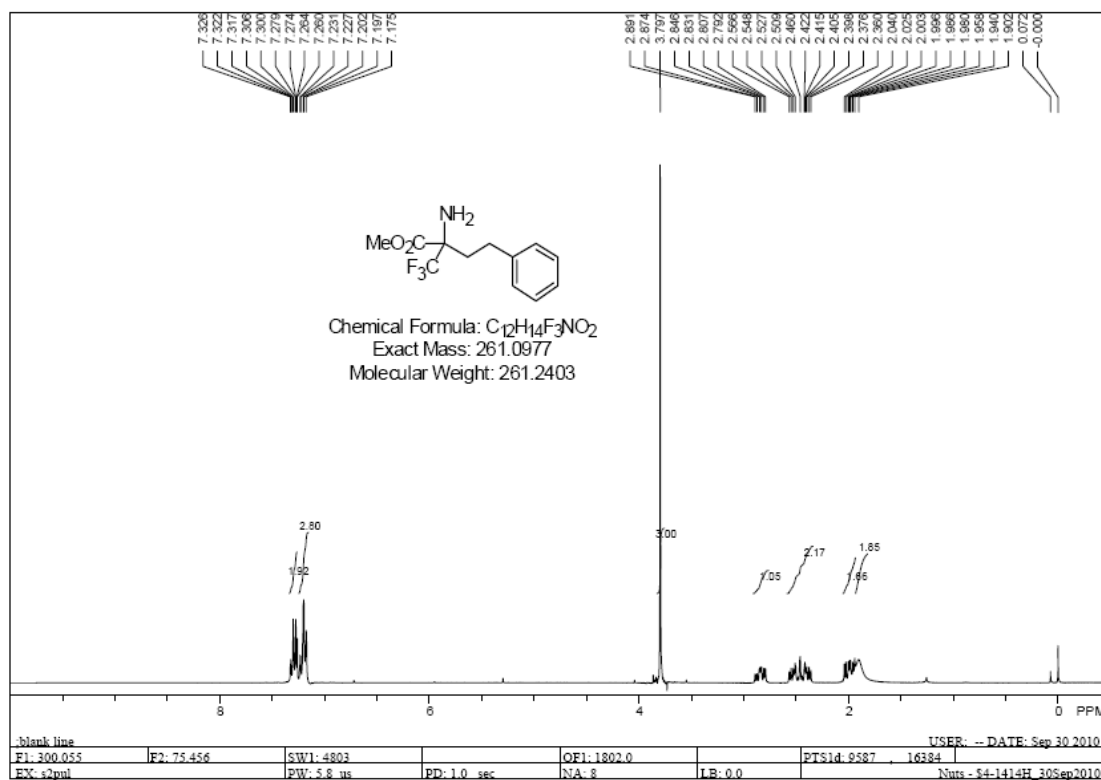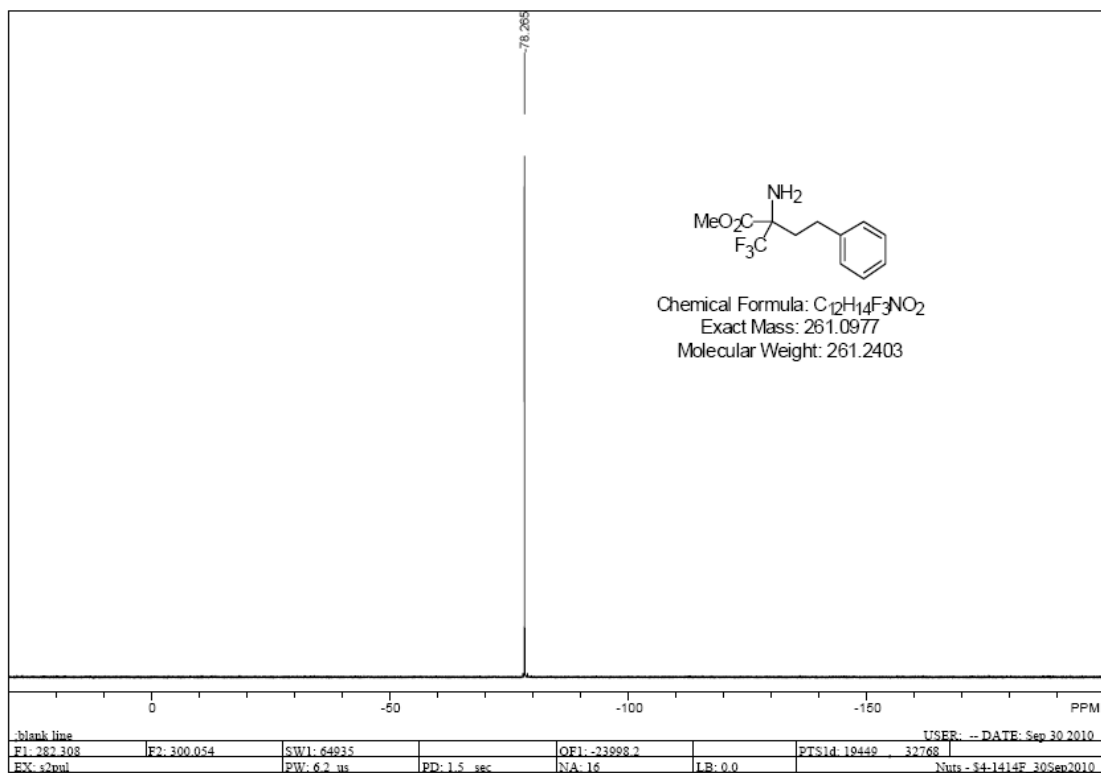

HGC-4-13-C  
HGC-4-13

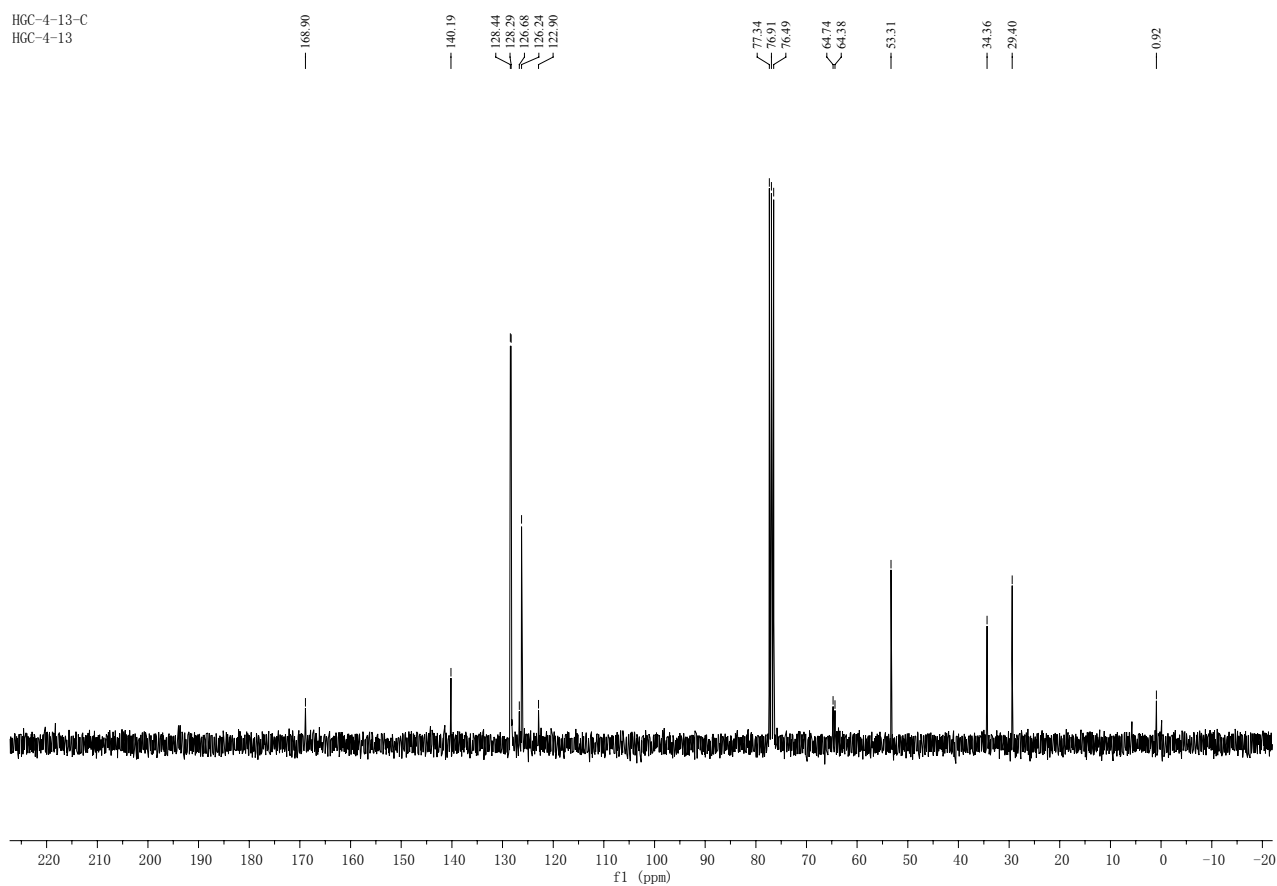

## Chiral HPLC Analysis of 7

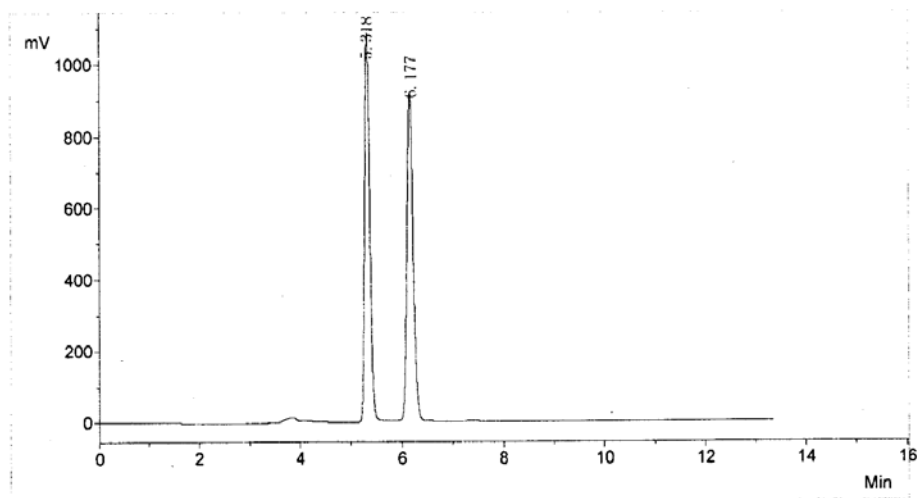

| No.   | PeakNo | R. Time | PeakHeight | PeakArea   | PerCent  |
|-------|--------|---------|------------|------------|----------|
| 1     | 1      | 5.318   | 1074946.8  | 7519959.4  | 49.2720  |
| 2     | 2      | 6.177   | 879287.2   | 7742186.9  | 50.7280  |
| Total |        |         | 1954234.0  | 15262146.3 | 100.0000 |

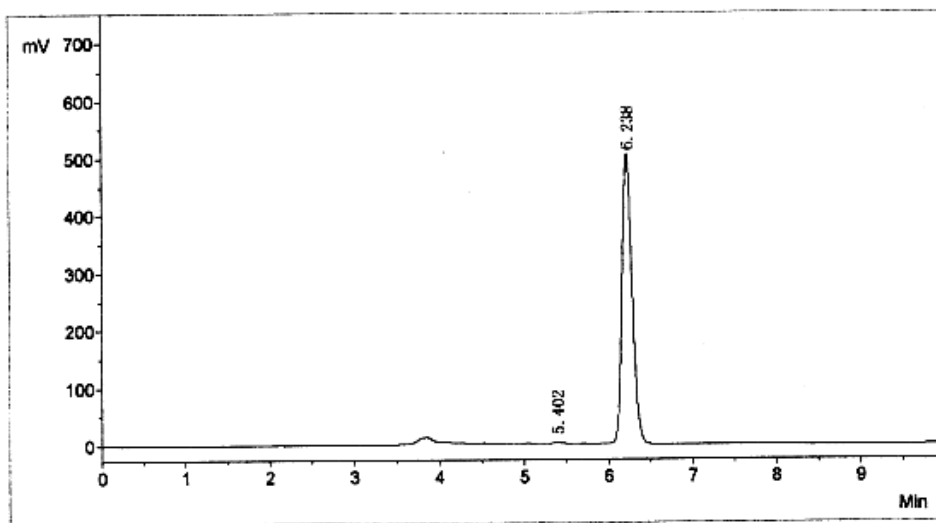

| No.   | PeakNo | R. Time | PeakHeight | PeakArea  | PerCent  |
|-------|--------|---------|------------|-----------|----------|
| 1     | 1      | 5.402   | 2971.9     | 18229.2   | 0.4348   |
| 2     | 2      | 6.238   | 495937.7   | 4174408.7 | 99.5652  |
| Total |        |         | 498909.5   | 4192637.9 | 100.0000 |
